# Supplementary material for: Cobalt-catalyzed C8–H sulfonylation of 1-naphthylamine derivatives with sodium sulfinates
Source: Royal Society of Chemistry journal article supplement (doi:10.1039/d1qo00975c), 2021-01-01

## Supporting Information

### Cobalt-Catalyzed C8-H Sulfonylation of 1-Naphthylamine Derivatives with Sodium Sulfinates

Yucong Sun,<sup>†</sup> Cancan Feng,<sup>†</sup> Peisong Wang,<sup>†</sup> Fan Yang,<sup>\*,†</sup> and Yangjie Wu<sup>\*,†</sup>

<sup>†</sup>College of Chemistry, Green Catalysis Center, Henan Key Laboratory of Chemical Biology and Organic Chemistry, Key Laboratory of Applied Chemistry of Henan Universities, Zhengzhou University, Zhengzhou 450052, PR China

E-mail: yangf@zzu.edu.cn; wyj@zzu.edu.cn

#### Table of Contents

|                                                                                   |            |
|-----------------------------------------------------------------------------------|------------|
| <b>1. General Information</b>                                                     | <b>S2</b>  |
| <b>2. Optimization of Reaction Conditions</b>                                     | <b>S2</b>  |
| <b>3. Experimental Section</b>                                                    | <b>S4</b>  |
| 3.1. Typical procedure for the synthesis of substrate 1a                          |            |
| 3.2. Typical procedure for the product 2a                                         |            |
| 3.3. Typical procedure for the product 3aa                                        |            |
| 3.4. Typical procedure for the product 4a                                         |            |
| 3.5. The experiment of trapping the radicals                                      |            |
| 3.6. Kinetic isotope effect measurements                                          |            |
| <b>4. Characterization Data of the Products</b>                                   | <b>S8</b>  |
| <b>5. References</b>                                                              | <b>S19</b> |
| <b>6. The Single Crystal X-ray Diffraction Study of 3aa</b>                       | <b>S19</b> |
| <b>7. Copies of <sup>1</sup>H and <sup>13</sup>C NMR Spectra for the Products</b> | <b>S21</b> |

## 1. General Information

$^1\text{H}$  NMR and  $^{13}\text{C}$  NMR spectra were recorded on a Bruker DPX-400 spectrometer with  $\text{CDCl}_3$  as the solvent and TMS as an internal standard. Melting points were measured using a WC-1 microscopic apparatus and are uncorrected. High resolution mass spectra were ensured on an Agilent Technologies 1290-6540 UHPLC/Accurate-Mass Quadrupole Time-of-Flight LC/MS. All solvents were used with further purification. Dichloromethane, ethyl acetate, and hexane were used for column chromatography. The commercials were obtained from commercial sources and used as-received without further purification unless otherwise noted.

## 2. Optimization of Reaction Conditions

Table S1. Optimization of Solvent and Catalyst<sup>a</sup>

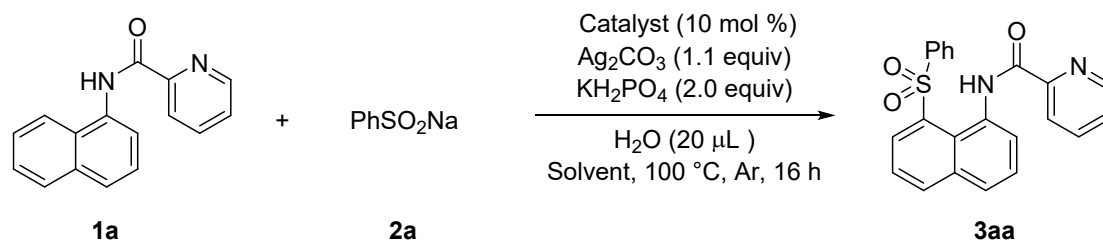

| Entry | Catalyst                                           | Solvent                     | Yield <sup>b</sup> |
|-------|----------------------------------------------------|-----------------------------|--------------------|
| 1     | $\text{CoCl}_2 \cdot 6\text{H}_2\text{O}$          | DCE                         | <5%                |
| 2     | $\text{CoCl}_2 \cdot 6\text{H}_2\text{O}$          | THF                         | 22%                |
| 3     | $\text{CoCl}_2 \cdot 6\text{H}_2\text{O}$          | DMA                         | <5%                |
| 4     | $\text{CoCl}_2 \cdot 6\text{H}_2\text{O}$          | DMSO                        | <5%                |
| 5     | $\text{CoCl}_2 \cdot 6\text{H}_2\text{O}$          | MeCN                        | 13%                |
| 6     | $\text{CoCl}_2 \cdot 6\text{H}_2\text{O}$          | $\text{CH}_3\text{OH}$      | <5%                |
| 7     | $\text{CoCl}_2 \cdot 6\text{H}_2\text{O}$          | acetone                     | 8%                 |
| 8     | $\text{CoCl}_2 \cdot 6\text{H}_2\text{O}$          | toluene                     | <5%                |
| 9     | $\text{CoCl}_2 \cdot 6\text{H}_2\text{O}$          | 1,4-dioxane                 | 26%                |
| 10    | $\text{CoCl}_2 \cdot 6\text{H}_2\text{O}$          | HFIP                        | <5%                |
| 11    | $\text{CoCl}_2 \cdot 6\text{H}_2\text{O}$          | 1,4-dioxane/MeCN(v/v = 2:1) | 35%                |
| 12    | $\text{NiCl}_2 \cdot 6\text{H}_2\text{O}$          | 1,4-dioxane/MeCN(v/v = 2:1) | <5%                |
| 13    | $\text{FeCl}_3$                                    | 1,4-dioxane/MeCN(v/v = 2:1) | <5%                |
| 14    | $\text{Cu}(\text{OAc})_2 \cdot \text{H}_2\text{O}$ | 1,4-dioxane/MeCN(v/v = 2:1) | <5%                |
| 15    | $\text{Pd}(\text{OAc})_2$                          | 1,4-dioxane/MeCN(v/v = 2:1) | <5%                |
| 16    | $\text{Co}(\text{NO}_3)_2$                         | 1,4-dioxane/MeCN(v/v = 2:1) | 38%                |
| 17    | $\text{Co}(\text{OAc})_2$                          | 1,4-dioxane/MeCN(v/v = 2:1) | <5%                |

18

Co(acac)<sub>2</sub>

1,4-dioxane/MeCN(v/v = 2:1)

10%

<sup>a</sup> Reaction conditions: **1a** (0.1 mmol), **2a** (2.0 equiv.), catalysts (10 mol %), KH<sub>2</sub>PO<sub>4</sub> (2.0 equiv.), Ag<sub>2</sub>CO<sub>3</sub> (1.1 equiv.), H<sub>2</sub>O (20 μL) in solvent (1.0 mL) at 100 °C under argon for 16 h. <sup>b</sup> Isolated yield.

Table S2. Optimization of Base, Oxidant and Additive<sup>a</sup>
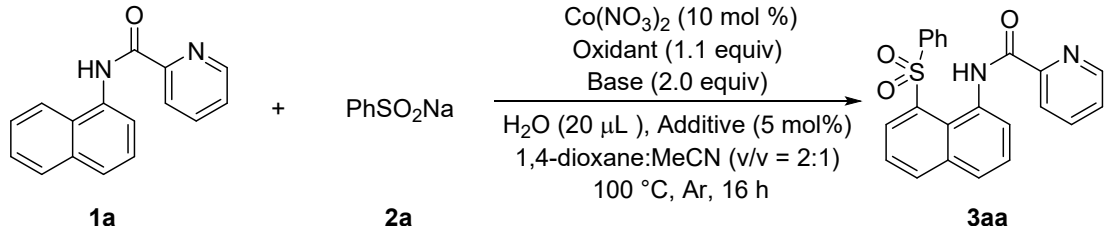

| Entry | Base                                             | Oxidant                                      | Additive | yield <sup>b</sup> |
|-------|--------------------------------------------------|----------------------------------------------|----------|--------------------|
| 1     | (NH <sub>4</sub> ) <sub>2</sub> HPO <sub>4</sub> | Ag <sub>2</sub> CO <sub>3</sub>              | -        | 36%                |
| 2     | <sup>t</sup> BuOK                                | Ag <sub>2</sub> CO <sub>3</sub>              | -        | <5%                |
| 3     | Na <sub>2</sub> CO <sub>3</sub>                  | Ag <sub>2</sub> CO <sub>3</sub>              | -        | 38%                |
| 4     | Na <sub>3</sub> PO <sub>4</sub>                  | Ag <sub>2</sub> CO <sub>3</sub>              | -        | 28%                |
| 5     | K <sub>2</sub> CO <sub>3</sub>                   | Ag <sub>2</sub> CO <sub>3</sub>              | -        | 23%                |
| 6     | KOAc                                             | Ag <sub>2</sub> CO <sub>3</sub>              | -        | 21%                |
| 7     | LiF                                              | Ag <sub>2</sub> CO <sub>3</sub>              | -        | 23%                |
| 8     | NaF                                              | Ag <sub>2</sub> CO <sub>3</sub>              | -        | 41%                |
| 9     | NaI                                              | Ag <sub>2</sub> CO <sub>3</sub>              | -        | 13%                |
| 10    | Cs <sub>2</sub> CO <sub>3</sub>                  | Ag <sub>2</sub> CO <sub>3</sub>              | -        | <5%                |
| 11    | PivONa                                           | Ag <sub>2</sub> CO <sub>3</sub>              | -        | <5%                |
| 12    | DBU                                              | Ag <sub>2</sub> CO <sub>3</sub>              | -        | <5%                |
| 13    | NEt <sub>3</sub>                                 | Ag <sub>2</sub> CO <sub>3</sub>              | -        | 24%                |
| 14    | Pyridine                                         | Ag <sub>2</sub> CO <sub>3</sub>              | -        | 32%                |
| 15    | NaF                                              | TBHP                                         | -        | <5%                |
| 16    | NaF                                              | I <sub>2</sub>                               | -        | <5%                |
| 17    | NaF                                              | K <sub>2</sub> S <sub>2</sub> O <sub>8</sub> | -        | <5%                |
| 18    | NaF                                              | BPO                                          | -        | <5%                |
| 19    | NaF                                              | MnO <sub>2</sub>                             | -        | 7%                 |
| 20    | NaF                                              | Ag <sub>2</sub> O                            | -        | <5%                |
| 21    | NaF                                              | AgOAc                                        | -        | 8%                 |
| 22    | NaF                                              | AgNO <sub>2</sub>                            | -        | 15%                |
| 23    | NaF                                              | AgI                                          | -        | <5%                |
| 24    | NaF                                              | Ag <sub>2</sub> CO <sub>3</sub>              | dppe     | 57%                |

|                 |     |                                 |                  |     |
|-----------------|-----|---------------------------------|------------------|-----|
| 25              | NaF | Ag <sub>2</sub> CO <sub>3</sub> | PPh <sub>3</sub> | 51% |
| 26              | NaF | Ag <sub>2</sub> CO <sub>3</sub> | Selectfluor      | 62% |
| 27              | NaF | Ag <sub>2</sub> CO <sub>3</sub> | NFSI             | 72% |
| 28 <sup>c</sup> | NaF | Ag <sub>2</sub> CO <sub>3</sub> | NFSI             | <5% |
| 29              | NaF | -                               | NFSI             | <5% |
| 30 <sup>d</sup> | NaF | Ag <sub>2</sub> CO <sub>3</sub> | NFSI             | 64% |
| 31 <sup>e</sup> | NaF | Ag <sub>2</sub> CO <sub>3</sub> | NFSI             | 65% |
| 32 <sup>f</sup> | NaF | Ag <sub>2</sub> CO <sub>3</sub> | NFSI             | 52% |
| 33 <sup>g</sup> | NaF | Ag <sub>2</sub> CO <sub>3</sub> | NFSI             | 54% |

<sup>a</sup> Reaction conditions: **1a** (0.1 mmol), **2a** (2 equiv.), Co(NO<sub>3</sub>)<sub>2</sub> (10 mol%), base (2.0 equiv.) and oxidant (1.1 equiv.), additive (5 mol%), H<sub>2</sub>O (20 μL) in 1,4-dioxane/MeCN(v/v = 2:1) (1.0 mL) at 100 °C under argon for 16 h. <sup>b</sup> Isolated yield. <sup>c</sup> In the absence of Co(NO<sub>3</sub>)<sub>2</sub>. <sup>d</sup> At an additive loading of 20 mol%. <sup>e</sup> At a catalysis loading of 5 mol%. <sup>f</sup> In the absence of water. <sup>g</sup> Under air.

### 3. Experimental Section

#### 3.1. Typical Procedure for the Synthesis of Substrate **1a**

A 100 mL two-necked round-bottom flask was equipped with a magnetic stir bar and charged with 1-naphthylamine (20 mmol, 2.86 g), picolinic acid (1.1 equiv., 2.70 g), N,N-dimethyl-4-aminopyridine (DMAP, 0.1 equiv., 0.244 g) in 30 mL anhydrous CH<sub>2</sub>Cl<sub>2</sub> at 0 °C. After EDCI (4.20 g, 1.1 equiv.) in CH<sub>2</sub>Cl<sub>2</sub> (20 mL) was added dropwise to the solution under a nitrogen atmosphere, the reaction was then warmed to room temperature, stirred for 12 h and quenched with water (30 mL). The reaction mixture was extracted with CH<sub>2</sub>Cl<sub>2</sub> (3 × 20 mL), and the combined organic solvent was dried over Na<sub>2</sub>SO<sub>4</sub>, filtered and concentrated under reduced pressure. The resulting residue was purified by column chromatography (hexane/ethyl acetate = 3:1) (V/V) to afford the pure product **1a** as a white solid (4.42 g, 89%).

All amides were prepared from the corresponding 1-naphthylamine derivatives and 2-picolinic acid according to the reported procedure.<sup>[1]</sup>

#### 3.2. Typical Procedure for the Product **2a**

Sodium sulfite (2.50 g, 20 mmol), sodium hydrogen carbonate (1.68 g, 20 mmol), and sulfonyl chlorides (10 mmol) were added to water (10 mL). After stirring at 80 °C for 4 h, water was removed by rotary evaporator. Then, the remaining solid was extracted and recrystallized by ethanol to obtain a white solid as the desired product. Other sodium sulfinates were prepared through a similar route from their corresponding sulfonyl chlorides.<sup>[2]</sup>

#### 3.3. Typical Procedure for the Product **3aa**

A Schlenk tube was equipped with a magnetic stir bar and charged with N-(naphthalen-1-yl)picolinamide **1a** (0.1 mmol, 24.8 mg), **2a** (0.2 mmol, 32 mg), Co(NO<sub>3</sub>)<sub>2</sub> (0.01 mmol, 1.8 mg),



NaF (0.2 mmol, 8 mg), Ag<sub>2</sub>CO<sub>3</sub> (0.11 mmol, 30 mg), NFSI (0.005 mmol, 1.3 mg), H<sub>2</sub>O (20 μL) in 1,4-dioxane/MeCN (v/v = 2:1) (1.0 mL). The resulting mixture was sealed under argon, heated at 100 °C for 16 h, and cooled to room temperature. Upon completion, CH<sub>2</sub>Cl<sub>2</sub> (20 mL) was added to the reaction system, and the resulting mixture was filtered through a pad of Celite. After the organic material was concentrated in vacuum, the product was purified by column chromatography on silica gel (100–200 mesh) using hexane/EtOAc as an eluent (2:1, V/V) to afford the pure product **3aa**.

### 3.4. Typical Procedure for the Product 4a

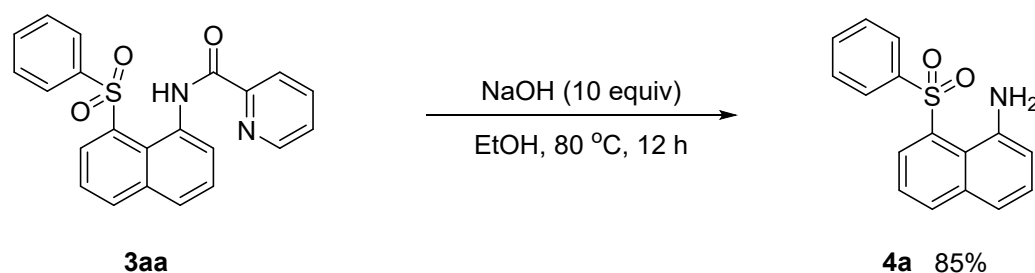

A mixture of **3aa** (77.6 mg, 0.2 mmol, 1.0 equiv) and NaOH (80 mg, 2 mmol, 10 equiv.) was heated in ethanol (2 mL) for 12 h at 80 °C. After the mixture was cooled to room temperature and diluted with water (3.0 mL), the solution of diluted hydrochloric acid was added until it was acidic. The saturated NaHCO<sub>3</sub> solution was then added until the pH value was about 7. The mixture was then extracted with CH<sub>2</sub>Cl<sub>2</sub> and dried over anhydrous Na<sub>2</sub>SO<sub>4</sub>. After the organic material was concentrated in vacuum, the product was purified by column chromatography on silica gel (100–200 mesh) using hexane/EtOAc as an eluent (2:1, V/V) to afford the pure product **4a**.

### 3.5. The Experiment of Trapping the Radicals

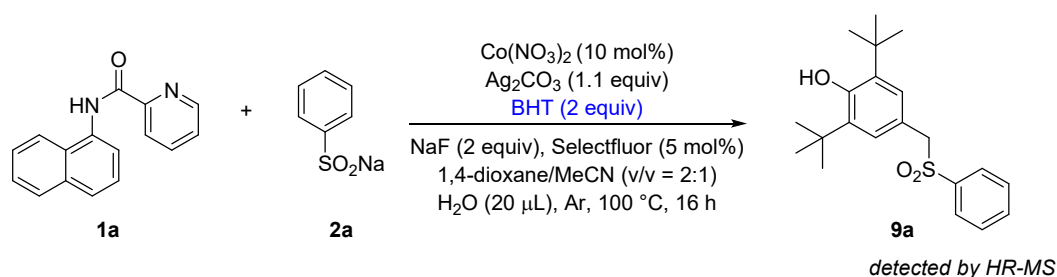

HRMS (ESI<sup>+</sup>): calcd for C<sub>21</sub>H<sub>28</sub>O<sub>3</sub>S [M+Na]<sup>+</sup>: 383.1651, Found: 383.1652.

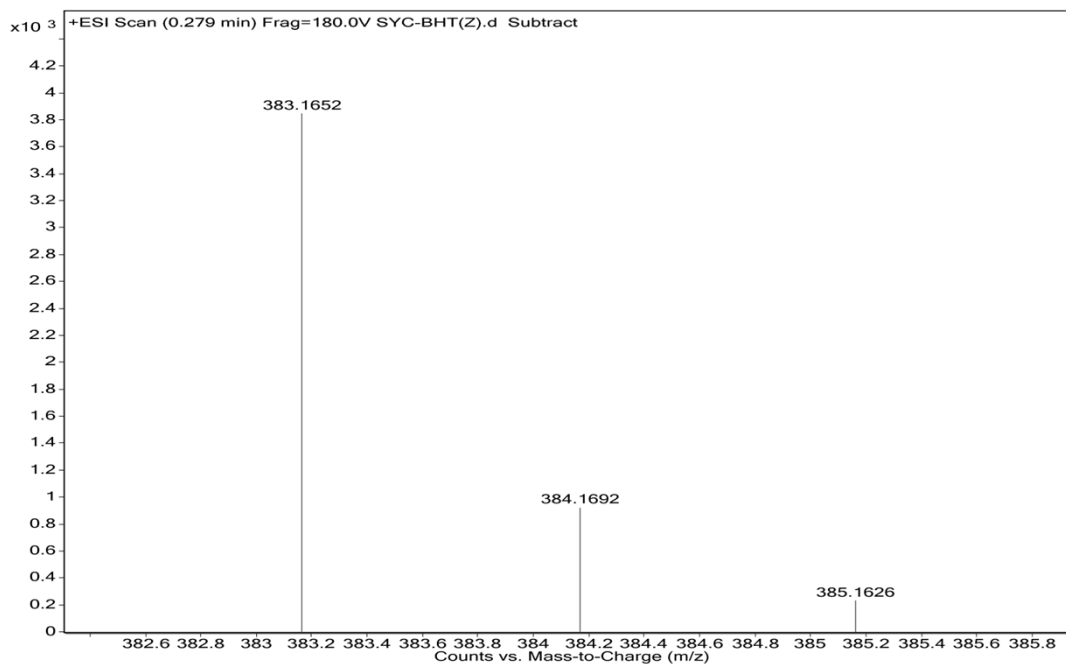

### 3.6. Kinetic Isotope Effect Experiments

(1) H/D exchange reaction

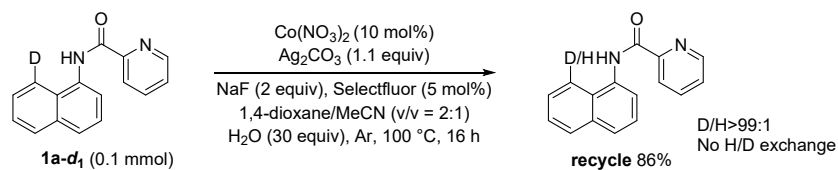

(2) Parallel reaction

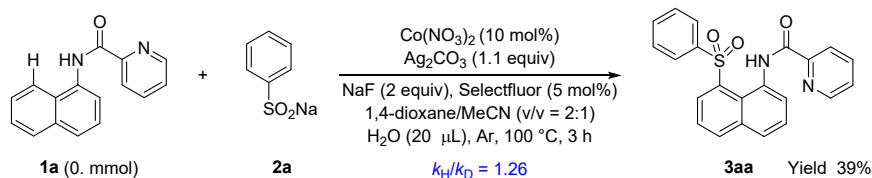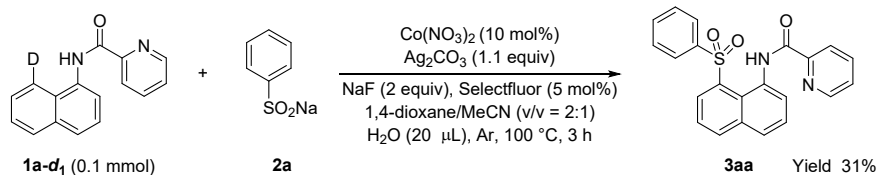

(3) Competitive reaction

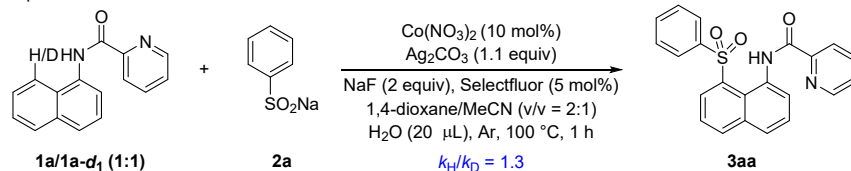

**Deuterium Exchange Experiment:** A Schlenk tube was equipped with a magnetic stir bar and charged with N-(naphthalen-1-yl)picolinamide **1a-d<sub>1</sub>** (0.1 mmol), Co(NO<sub>3</sub>)<sub>2</sub> (0.01 mmol, 1.8 mg),

NaF (0.2 mmol, 8 mg), Ag<sub>2</sub>CO<sub>3</sub> (0.11 mmol, 30 mg), NFSI (0.005 mmol, 1.3 mg), H<sub>2</sub>O (54 μL, 30 equiv.) in 1,4-dioxane/MeCN (v/v = 2:1) (1.0 mL). The resulting mixture was sealed and heated at 100 °C for 16 h, and cooled to room temperature. Upon completion, the mixture was added into H<sub>2</sub>O (20 mL) and extracted with ethyl acetate (10 mL × 3). The organic layer was collected, dried over anhydrous sodium sulfate, and then filtered. After evaporation of the solvent under vacuum, the residue was purified by column chromatography on silica gel (100-200 mesh) using hexane-EtOAc as an eluent (3:1, V/V). The substrate **1a-d<sub>1</sub>** was successfully recycled (21.3 mg, 86% isolated yield), and its structure was confirmed by <sup>1</sup>H NMR spectrum, which suggested that the H/D exchange did not occur.

**Parallel Reaction:** A Schlenk tube was equipped with a magnetic stir bar and charged with N-(naphthalen-1-yl)picolinamide **1a** (0.1 mmol) or **1a-d<sub>1</sub>** (0.1 mmol), **2a** (0.2 mmol, 32 mg), Co(NO<sub>3</sub>)<sub>2</sub> (0.01 mmol, 1.8 mg), NaF (0.2 mmol, 8 mg), Ag<sub>2</sub>CO<sub>3</sub> (0.11 mmol, 30 mg), NFSI (0.005 mmol, 1.3 mg), H<sub>2</sub>O (20 μL) in 1,4-dioxane/MeCN (v/v = 2:1) (1.0 mL). The resulting mixture was sealed under Ar, heated at 100 °C for 3 h and cooled to room temperature. Upon completion, CH<sub>2</sub>Cl<sub>2</sub> (20 mL) was added to the reaction system, and the resulting mixture was filtered through a pad of Celite. After the organic material was concentrated in vacuum, the product was purified by column chromatography on silica gel (100–200 mesh) using hexane/EtOAc as an eluent (2:1, V/V) to afford the pure product **3aa**, which was analyzed by <sup>1</sup>H NMR spectrum., respectively. The KIE value was calculated as  $k_H/k_D = 1.26$

**Competitive Reaction:** A Schlenk tube was equipped with a magnetic stir bar and charged with N-(naphthalen-1-yl)picolinamide **1a** (0.05 mmol, 12.4 mg), **1a-d<sub>1</sub>** (0.05 mmol, 12.4 mg), **2a** (0.2 mmol, 32 mg), Co(NO<sub>3</sub>)<sub>2</sub> (0.01 mmol, 1.8 mg), NaF (0.2 mmol, 8 mg), Ag<sub>2</sub>CO<sub>3</sub> (0.11 mmol, 30 mg), NFSI (0.005 mmol, 1.3 mg), H<sub>2</sub>O (20 μL) in 1,4-dioxane/MeCN (v/v = 2:1) (1.0 mL). The resulting mixture was sealed under Ar, heated at 100 °C for 1 h and cooled to room temperature. Upon completion, CH<sub>2</sub>Cl<sub>2</sub> (20 mL) was added to the reaction system, and the resulting mixture was filtered through a pad of Celite. After the organic material was concentrated in vacuum, the product was purified by column chromatography on silica gel (100–200 mesh) using hexane/EtOAc as an eluent (2:1, V/V) to afford the pure product **1a/1a-d<sub>1</sub>**, and then analyzed by <sup>1</sup>H NMR spectrum. The KIE value was calculated as  $k_H/k_D = 1.3$ .

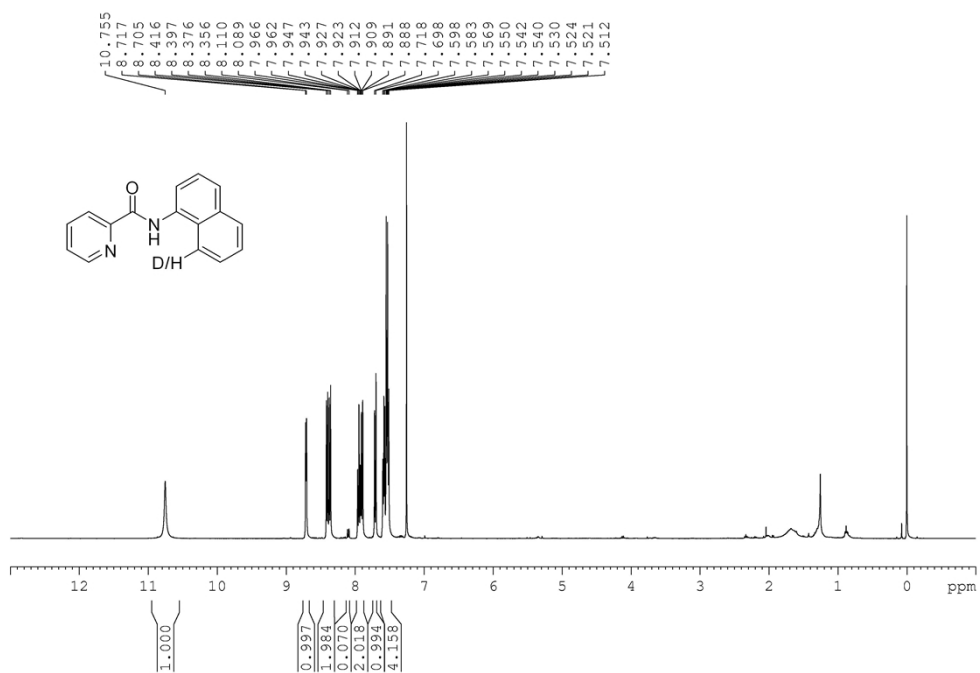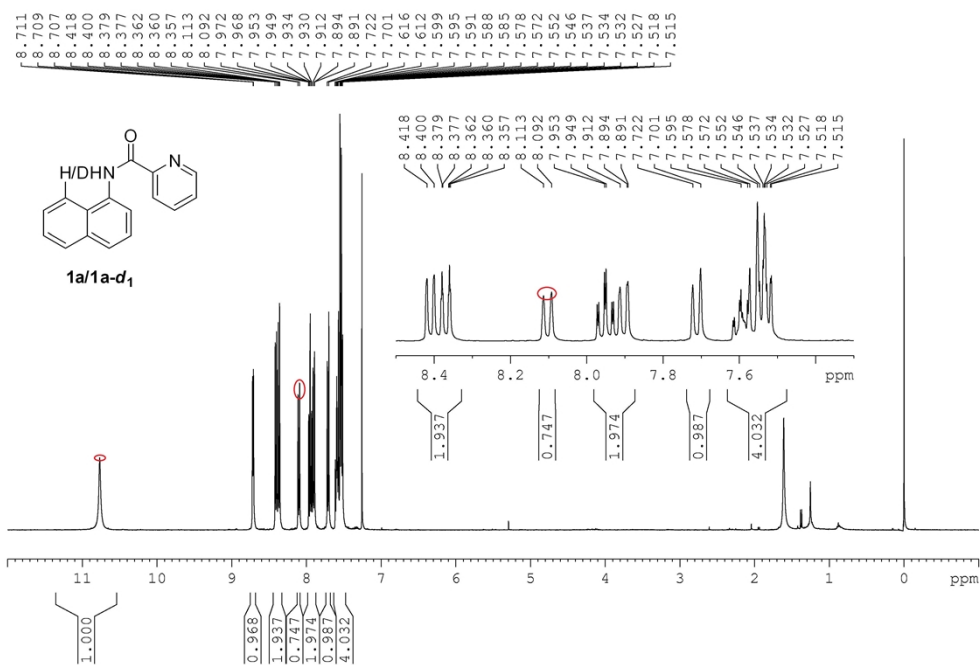

#### 4. Characterization Data of the Products

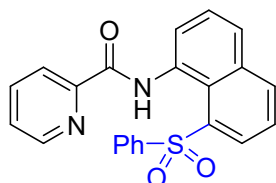

N-(8-(phenylsulfonyl)naphthalen-1-yl)picolinamide (**3aa**): white solid (72%), mp 230-232 °C; <sup>1</sup>H NMR (400 MHz, CDCl<sub>3</sub>) δ 11.10 (s, 1H), 8.77-8.70 (m, 1H), 8.56 (dd, *J*<sub>1</sub> = 7.49 Hz, *J*<sub>2</sub> = 1.27 Hz, 1H), 8.28-8.21 (m, 1H), 8.00-7.93 (m, 1H), 7.81 (d, *J* = 7.61 Hz, 2H), 7.78-7.73 (m, 1H), 7.70-7.65 (m, 1H), 7.65-7.60 (m, 1H), 7.49-7.44 (m, 1H), 7.36-7.32 (m, 2H), 7.24-7.18 (m, 1H), 7.04-6.97 (m, 2H); <sup>13</sup>C NMR (100 MHz, CDCl<sub>3</sub>) δ 164.1, 150.0, 148.0, 142.8, 136.9, 136.7, 136.3, 133.7, 132.6, 132.1, 131.4, 130.5, 128.7, 128.4, 127.3, 126.2, 126.2, 124.5, 123.9, 122.8; HRMS (ESI<sup>+</sup>): calcd for C<sub>22</sub>H<sub>16</sub>N<sub>2</sub>O<sub>3</sub>S [M+H]<sup>+</sup>: 389.0954, Found: 389.0952.

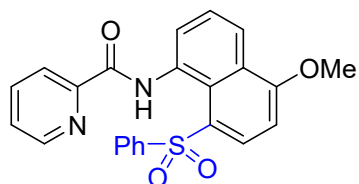

N-(5-methoxy-8-(phenylsulfonyl)naphthalen-1-yl)picolinamide (**3ba**): white solid (67%), mp 213-215 °C; <sup>1</sup>H NMR (400 MHz, CDCl<sub>3</sub>) δ 11.08 (s, 1H), 8.75-8.69 (m, 1H), 8.62 (d, *J* = 8.59 Hz, 1H), 8.50-8.42 (m, 1H), 7.80-7.70 (m, 3H), 7.68-7.60 (m, 1H), 7.48-7.42 (m, 1H), 7.33-7.27 (m, 2H), 7.18-7.11 (m, 1H), 6.98-6.91 (m, 3H), 4.14 (s, 3H); <sup>13</sup>C NMR (100 MHz, CDCl<sub>3</sub>) δ 164.0, 161.2, 149.9, 148.0, 143.6, 136.6, 136.1, 131.7, 131.2, 131.0, 128.2, 128.2, 127.6, 126.6, 126.2, 124.1, 123.3, 122.7, 122.2, 102.0, 56.3; HRMS (ESI<sup>+</sup>): calcd for C<sub>23</sub>H<sub>18</sub>N<sub>2</sub>O<sub>4</sub>S [M+H]<sup>+</sup>: 419.1060, Found: 419.1062.

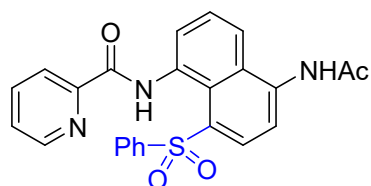

N-(5-acetamino-8-(phenylsulfonyl)naphthalen-1-yl)picolinamide (**3ca**): white solid (62%), mp 259-261 °C; <sup>1</sup>H NMR (400 MHz, CDCl<sub>3</sub>) δ 11.05 (s, 1H), 8.73 (d, *J* = 4.38 Hz, 1H), 8.47 (s, 1H), 8.29-8.171 (m, 1H), 8.06 (s, 1H), 7.94-7.84 (m, 2H), 7.84-7.77 (m, 1H), 7.68-7.62 (m, 1H), 7.53-7.42 (m, 4H), 7.34-7.28 (m, 1H), 7.17-7.02 (m, 2H), 2.41 (s, 3H); <sup>13</sup>C NMR (100 MHz, CDCl<sub>3</sub>) δ 164.6, 149.8, 148.2, 142.0, 139.3, 136.9, 133.2, 132.5, 131.8, 130.3, 128.6, 127.1, 126.8, 126.5, 125.5, 122.7, 120.9, 117.8, 43.4, 29.7; HRMS (ESI<sup>+</sup>): calcd for C<sub>24</sub>H<sub>19</sub>N<sub>3</sub>O<sub>4</sub>S [M+H]<sup>+</sup>: 446.1169, Found: 446.1167

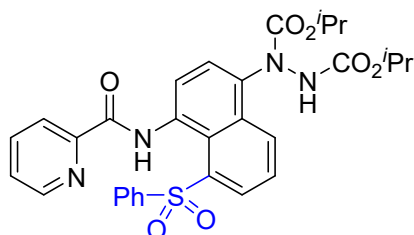

N-(4-(hydrazone-1,2-dicarboxylate)-8-(phenylsulfonyl)naphthalen-1-yl)picolinamide (**3da**): white solid (53%), mp 138-140 °C; <sup>1</sup>H NMR (400 MHz, CDCl<sub>3</sub>) δ 11.18 (s, 1H), 8.95-8.59 (m, 2H), 8.56-8.48 (m, 1H), 7.90-7.72 (m, 4H), 7.71-7.53 (m, 2H), 7.51-7.44 (m, 1H), 7.41-7.31 (m, 2H), 7.26-7.19 (m, 1H), 7.11-6.96 (m, 2H), 5.15-4.85 (m, 2H), 1.22 (s, 12H); <sup>13</sup>C NMR (100 MHz, CDCl<sub>3</sub>) δ 164.3, 156.0, 155.3, 149.7, 148.1, 142.6, 138.1, 136.8, 133.8, 133.2, 132.3, 131.9, 131.7, 130.0, 128.4, 126.8, 126.4, 124.7, 124.5, 122.9, 71.4, 70.1, 21.9, 21.8; HRMS (ESI<sup>+</sup>): calcd for C<sub>30</sub>H<sub>30</sub>N<sub>4</sub>O<sub>7</sub>S [M+H]<sup>+</sup>: 591.1908, Found: 591.1904

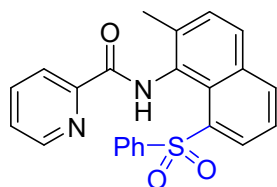

N-(2-methyl-8-(phenylsulfonyl)naphthalen-1-yl)picolinamide (**3ea**): white solid (25%), mp 240-242 °C; <sup>1</sup>H NMR (400 MHz, CDCl<sub>3</sub>) δ 10.06 (s, 1H), 8.75-8.68 (m, 1H), 8.66-8.57 (m, 1H), 8.51 (s, 1H), 8.32 (d, *J* = 7.81 Hz, 1H), 8.07-7.89 (m, 4H), 7.62-7.40 (m, 6H), 2.58 (s, 3H); <sup>13</sup>C NMR (100 MHz, CDCl<sub>3</sub>) δ 162.6, 149.1, 148.3, 141.7, 137.8, 136.2, 134.4, 133.1, 133.0, 132.0, 131.3, 129.1, 127.8, 127.5, 127.4, 127.4, 126.9, 124.6, 123.5, 122.8, 19.1; HRMS (ESI<sup>+</sup>): calcd for C<sub>23</sub>H<sub>18</sub>N<sub>2</sub>O<sub>3</sub>S [M+H]<sup>+</sup>: 403.1111, Found: 403.1110.

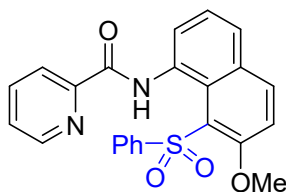

N-(7-methoxy-8-(phenylsulfonyl)naphthalen-1-yl)picolinamide (**3fa**): white solid (41%), mp 208-210 °C; <sup>1</sup>H NMR (400 MHz, CDCl<sub>3</sub>) δ 11.39 (s, 1H), 8.68 (d, *J* = 4.08 Hz, 1H), 8.17 (d, *J* = 7.78 Hz, 1H), 8.01 (d, *J* = 8.17 Hz, 1H), 7.87 (d, *J* = 7.30 Hz, 1H), 7.84-7.76 (m, 2H), 7.70 (d, *J* = 7.55 Hz, 2H), 7.57 (t, *J* = 7.64 Hz, 1H), 7.44-7.30 (m, 4H), 7.07 (d, *J* = 8.03 Hz, 1H), 3.35 (s, 3H); <sup>13</sup>C NMR (100 MHz, CDCl<sub>3</sub>) δ 164.2, 158.8, 150.3, 148.3, 145.6, 137.3, 136.9, 132.2, 132.0, 130.9, 130.4, 128.7, 128.0, 127.6, 126.7, 126.0, 125.3, 122.5, 121.0, 113.1, 56.2; HRMS (ESI<sup>+</sup>): calcd for C<sub>23</sub>H<sub>18</sub>N<sub>2</sub>O<sub>4</sub>S [M+H]<sup>+</sup>: 441.0879, Found: 441.0884.

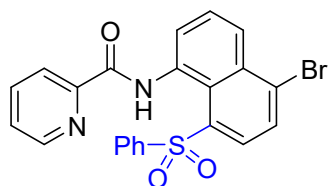

N-(5-Bromo-8-(phenylsulfonyl)naphthalen-1-yl) picolinamide (**3ga**): white solid (55%), mp 170-172 °C; <sup>1</sup>H NMR (400 MHz, DMSO-*d*<sub>6</sub>) δ 11.25 (s, 1H), 8.83 (d, *J* = 4.37 Hz, 1H), 8.63-8.53 (m, 2H), 8.38-8.29 (m, 1H), 8.27-8.21 (m, 1H), 8.21-8.09 (m, 2H), 8.01 (d, *J* = 7.42 Hz, 2H), 7.82-7.70 (m, 3H), 7.67-7.60 (m, 2H); <sup>13</sup>C NMR (100 MHz, DMSO) δ 163.4, 149.5, 149.2, 141.7, 139.8, 138.9, 134.0, 131.9, 130.9, 130.1, 129.1, 128.8, 128.0, 127.8, 127.6, 127.5, 124.6, 123.5, 123.0, 118.9; HRMS (ESI<sup>+</sup>): calcd for C<sub>22</sub>H<sub>15</sub>BrN<sub>2</sub>O<sub>3</sub>S [M+H]<sup>+</sup>: 467.0060, Found: 467.0058.

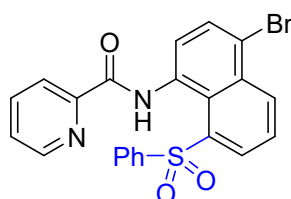

N-(4-bromo-8-(phenylsulfonyl)naphthalen-1-yl)picolinamide (**3ha**): white solid (53%), mp 175-177 °C; <sup>1</sup>H NMR (400 MHz, CDCl<sub>3</sub>) δ 11.05 (s, 1H), 8.75-8.71 (m, 1H), 8.54-8.48 (m, 1H), 8.33 (d, *J* = 8.13 Hz, 1H), 7.98 (d, *J* = 8.16 Hz, 1H), 7.87-7.74 (m, 4H), 7.49-7.44 (m, 1H), 7.38-7.32 (m, 2H), 7.25-7.20 (m, 1H), 7.08-7.00 (m, 2H); <sup>13</sup>C NMR (100 MHz, CDCl<sub>3</sub>) δ 164.2, 149.7, 148.1, 142.4, 136.8, 134.3, 133.1, 132.9, 132.5, 132.3, 132.0, 131.5, 128.7, 128.5, 128.5, 128.0, 127.5, 126.4, 124.5, 122.8; HRMS (ESI<sup>+</sup>): calcd for C<sub>22</sub>H<sub>15</sub>BrN<sub>2</sub>O<sub>3</sub>S [M+H]<sup>+</sup>: 467.0060, Found: 467.0059.

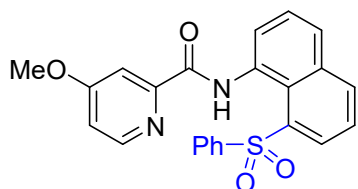

N-(8-(phenylsulfonyl)naphthalen-1-yl)-4-methoxypicolinamide (**3ia**): white solid (50%), mp 204-206 °C; <sup>1</sup>H NMR (400 MHz, CDCl<sub>3</sub>) δ 11.08 (s, 1H), 8.57-8.50 (m, 2H), 8.24 (d, *J* = 7.60 Hz, 1H), 7.95 (d, *J* = 7.89 Hz, 1H), 7.80 (d, *J* = 7.38 Hz, 1H), 7.70-7.59 (m, 2H), 7.39-7.32 (m, 3H), 7.28-7.23 (m, 1H), 7.09-7.02 (m, 2H), 6.99-6.95 (m, 1H); <sup>13</sup>C NMR (100 MHz, CDCl<sub>3</sub>) δ 166.5, 164.0, 151.9, 149.2, 142.7, 136.8, 136.3, 133.6, 132.7, 132.0, 131.4, 130.5, 128.7, 128.4, 127.3, 126.2, 124.6, 123.9, 113.0, 108.0, 55.5; HRMS (ESI<sup>+</sup>): calcd for C<sub>23</sub>H<sub>18</sub>N<sub>2</sub>O<sub>4</sub>S [M+H]<sup>+</sup>: 419.1060, Found: 419.1060.

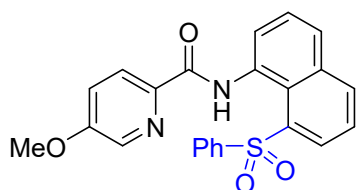

N-(8-(phenylsulfonyl)naphthalen-1-yl)-5-methoxypicolinamide (**3ja**): white solid (52%), mp 210-212 °C; <sup>1</sup>H NMR (400 MHz, CDCl<sub>3</sub>) δ 11.08 (s, 1H), 8.72 (d, *J* = 4.62 Hz, 1H), 8.62 (d, *J* = 8.52 Hz, 1H), 8.53-8.36 (m, 1H), 7.82-7.69 (m, 1H), 7.49-7.40 (m, 1H), 7.29 (d, *J* = 7.53 Hz, 2H), 7.19-7.10 (m, 1H), 6.98-6.89 (m, 3H), 4.14 (s, 3H); <sup>13</sup>C NMR (100 MHz, CDCl<sub>3</sub>) δ 164.0, 161.2, 150.0, 148.0, 143.6, 136.6, 136.1, 131.7, 131.2, 131.0, 128.2, 128.2, 127.6, 126.6, 126.2, 124.1, 123.3, 122.7, 122.2, 122.0, 102.0, 56.3; HRMS (ESI<sup>+</sup>): calcd for C<sub>23</sub>H<sub>18</sub>N<sub>2</sub>O<sub>4</sub>S [M+H]<sup>+</sup>: 419.1060, Found: 419.1058.

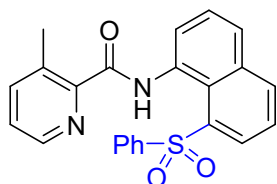

N-(8-(phenylsulfonyl)naphthalen-1-yl)-3-methylpicolinamide (**3ka**): white solid (42%), mp 240-242 °C; <sup>1</sup>H NMR (400 MHz, CDCl<sub>3</sub>) δ 11.13 (s, 1H), 8.61-8.56 (m, 2H), 8.27-8.21 (m, 1H), 7.97-7.91 (m, 1H), 7.84 (d, *J* = 7.48 Hz, 1H), 7.70-7.60 (m, 2H), 7.53-7.48 (m, 1H), 7.40-7.34 (m, 1H), 7.29-7.24 (m, 3H), 7.05-6.91 (m, 2H), 2.36 (s, 3H); <sup>13</sup>C NMR (100 MHz, CDCl<sub>3</sub>) δ 165.4, 147.2, 145.5, 143.0, 140.3, 137.0, 136.4, 135.8, 133.9, 132.4, 131.7, 131.6, 130.3, 128.4, 128.3, 127.2, 126.4, 125.8, 124.1, 123.9, 20.4; HRMS (ESI<sup>+</sup>): calcd for C<sub>23</sub>H<sub>18</sub>N<sub>2</sub>O<sub>3</sub>S [M+H]<sup>+</sup>: 403.1111, Found: 403.1112.

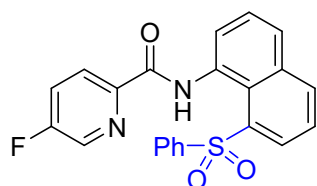

N-(8-(phenylsulfonyl)naphthalen-1-yl)-5-fluoropicolinamide (**3la**): yellow solid (32%), mp 160-162 °C; <sup>1</sup>H NMR (400 MHz, CDCl<sub>3</sub>) δ 10.98 (s, 1H), 8.55 (d, *J* = 2.68 Hz, 1H), 8.52-8.45 (m, 1H), 8.26-8.21 (m, 1H), 7.98-7.94 (m, 1H), 7.90-7.85 (m, 1H), 7.80 (d, *J* = 7.21 Hz, 1H), 7.71-7.59 (m, 2H), 7.52-7.42 (m, 2H), 7.41-7.35 (m, 2H), 7.11-7.05 (m, 2H); <sup>13</sup>C NMR (100 MHz, CDCl<sub>3</sub>) δ 163.0, 161.1 (d, *J* = 261.8 Hz), 146.4 (d, *J* = 3.91 Hz), 142.7, 136.9, 136.5 (d, *J* = 24.99 Hz), 136.3, 133.5, 132.7, 132.3, 131.2, 130.5, 128.8, 128.4, 127.3, 126.1, 124.7, 124.5 (d, *J* = 5.51 Hz), 124.0, 123.3 (d, *J* = 19.08 Hz); <sup>19</sup>F NMR (376 MHz, CDCl<sub>3</sub>): δ -121.86 (s, 1F); HRMS (ESI<sup>+</sup>): calcd for C<sub>22</sub>H<sub>15</sub>FN<sub>2</sub>O<sub>3</sub>S [M+H]<sup>+</sup>: 407.0860, Found: 407.0861.

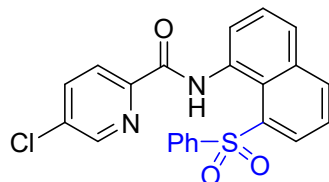

N-(8-(phenylsulfonyl)naphthalen-1-yl)-5-chloropicolinamide (**3ma**): white solid (38%), mp 170-172 °C; <sup>1</sup>H NMR (400 MHz, CDCl<sub>3</sub>) δ 10.86 (s, 1H), 8.76-8.65 (m, 3H), 8.60 (d, *J* = 8.32 Hz, 1H), 8.36-8.30 (m, 1H), 8.15-8.07 (m, 1H), 7.99-7.93 (m, 3H), 7.69-7.60 (m, 2H), 7.52-7.44 (m, 3H);



$^{13}\text{C}$  NMR (100 MHz,  $\text{CDCl}_3$ )  $\delta$  161.4, 147.4, 147.3, 142.0, 138.1, 137.7, 136.0, 132.9, 131.4, 131.1, 129.4, 129.1, 128.3, 127.3, 126.0, 125.4, 123.7, 120.7, 115.4; HRMS (ESI<sup>+</sup>): calcd for  $\text{C}_{22}\text{H}_{15}\text{ClN}_2\text{O}_3\text{S}$  [M+H]<sup>+</sup>: 423.0565, Found: 423.0569.

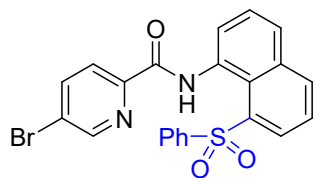

N-(8-(phenylsulfonyl)naphthalen-1-yl)-5-bromopicolinamide (**3na**): white solid (38%), mp 125-127 °C;  $^1\text{H}$  NMR (400 MHz,  $\text{CDCl}_3$ )  $\delta$  10.87 (s, 1H), 8.80-8.77 (m, 1H), 8.75-8.71 (m, 1H), 8.62-8.58 (m, 1H), 8.28-8.23 (m, 1H), 8.13-8.08 (m, 2H), 7.99-7.94 (m, 2H), 7.67-7.62 (m, 2H), 7.53-7.44 (m, 3H);  $^{13}\text{C}$  NMR (100 MHz,  $\text{CDCl}_3$ )  $\delta$  161.6, 149.5, 147.8, 142.0, 140.7, 138.1, 132.9, 131.4, 131.1, 129.4, 129.1, 128.3, 127.3, 127.2, 126.0, 125.4, 125.0, 124.1, 120.7, 115.5; HRMS (ESI<sup>+</sup>): calcd for  $\text{C}_{22}\text{H}_{15}\text{BrN}_2\text{O}_3\text{S}$  [M+H]<sup>+</sup>: 467.0060, Found: 467.0064.

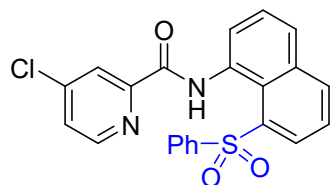

N-(8-(phenylsulfonyl)naphthalen-1-yl)-4-chloropicolinamide (**3oa**): white solid (52%), mp 194-196 °C;  $^1\text{H}$  NMR (400 MHz,  $\text{CDCl}_3$ )  $\delta$  11.03 (s, 1H), 8.62 (d,  $J = 5.16$  Hz, 1H), 8.56-8.44 (m, 1H), 8.25 (dd,  $J_1 = 8.18$  Hz,  $J_2 = 1.06$  Hz, 1H), 8.01-7.96 (m, 1H), 7.82-7.76 (m, 2H), 7.72-7.66 (m, 1H), 7.65-7.60 (m, 1H), 7.49-7.45 (m, 1H), 7.37-7.33 (m, 2H), 7.33-7.28 (m, 1H), 7.12-7.04 (m, 2H);  $^{13}\text{C}$  NMR (100 MHz,  $\text{CDCl}_3$ )  $\delta$  163.0, 151.4, 149.0, 145.3, 142.8, 136.9, 136.3, 133.7, 132.6, 132.2, 131.0, 130.6, 129.0, 128.5, 127.3, 126.3, 126.2, 124.6, 124.1, 123.3; HRMS (ESI<sup>+</sup>): calcd for  $\text{C}_{22}\text{H}_{15}\text{ClN}_2\text{O}_3\text{S}$  [M+H]<sup>+</sup>: 423.0565, Found: 423.0565.

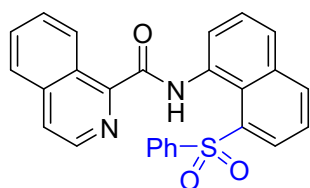

N-(8-(phenylsulfonyl)naphthalen-1-yl)isoquinoline-1-carboxamide (**3pa**): white solid (48%), mp 228-230 °C;  $^1\text{H}$  NMR (400 MHz,  $\text{CDCl}_3$ )  $\delta$  11.30 (s, 1H), 9.00-8.92 (m, 1H), 8.67 (d,  $J = 5.54$  Hz, 1H), 8.64-8.61 (m, 1H), 8.27 (dd,  $J_1 = 8.20$  Hz,  $J_2 = 1.20$  Hz, 1H), 8.00-7.95 (m, 2H), 7.90-7.85 (m, 2H), 7.74-7.69 (m, 2H), 7.68-7.62 (m, 1H), 7.58-7.53 (m, 1H), 7.15-7.09 (m, 2H), 7.76-6.75 (m, 1H), 6.65-6.59 (m, 2H);  $^{13}\text{C}$  NMR (100 MHz,  $\text{CDCl}_3$ )  $\delta$  165.4, 148.3, 142.8, 140.4, 137.2, 137.0, 136.4, 134.1, 132.4, 131.7, 131.5, 130.3, 130.0, 128.5, 128.2, 128.2, 127.5, 127.2, 127.1, 126.7, 126.2, 124.4, 124.0, 123.8; HRMS (ESI<sup>+</sup>): calcd for  $\text{C}_{26}\text{H}_{18}\text{N}_2\text{O}_3\text{S}$  [M+H]<sup>+</sup>: 439.1111, Found: 439.1114.

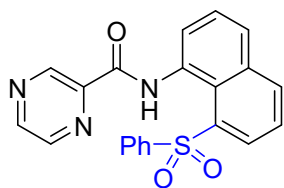

N-(8-(phenylsulfonyl)naphthalen-1-yl)pyrimidine-3-carboxamide (**3qa**): white solid (50%), mp 235-237 °C; <sup>1</sup>H NMR (400 MHz, CDCl<sub>3</sub>) δ 10.66 (s, 1H), 9.59 (d, *J* = 1.24 Hz, 1H), 8.90 (d, *J* = 2.41 Hz, 1H), 8.77-8.72 (m, 1H), 8.72-8.67 (m, 2H), 8.61 (d, *J* = 8.25 Hz, 1H), 8.14-8.07 (m, 1H), 8.00-7.95 (m, 2H), 7.69-7.61 (m, 2H), 7.55-7.44 (m, 3H); <sup>13</sup>C NMR (100 MHz, CDCl<sub>3</sub>) δ 161.0, 148.2, 144.9, 143.9, 142.5, 141.9, 137.7, 133.0, 131.9, 131.0, 129.4, 129.1, 128.4, 127.3, 127.3, 126.0, 125.5, 120.5, 115.9; HRMS (ESI<sup>+</sup>): calcd for C<sub>21</sub>H<sub>15</sub>N<sub>3</sub>O<sub>3</sub>S [M+H]<sup>+</sup>: 390.0907, Found: 390.0911.

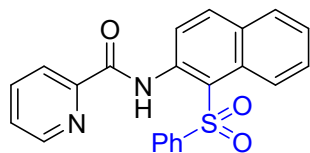

N-(1-(phenylsulfonyl)naphthalen-2-yl)picolinamide (**3ra**): light yellow solid (57%), mp 162-165 °C; <sup>1</sup>H NMR (400 MHz, CDCl<sub>3</sub>) δ 12.98 (s, 1H), 9.01-8.85 (m, 2H), 8.80 (d, *J* = 4.24 Hz, 1H), 8.37-8.23 (m, 1H), 8.08 (d, *J* = 9.18 Hz, 1H), 7.98-7.88 (m, 3H), 7.86-7.77 (m, 1H), 7.59-7.50 (m, 2H), 7.50-7.42 (m, 2H), 7.40-7.32 (m, 2H); <sup>13</sup>C NMR (100 MHz, CDCl<sub>3</sub>) δ 163.4, 149.8, 148.7, 142.5, 139.7, 137.5, 135.8, 133.2, 130.9, 130.0, 129.0, 128.9, 128.6, 126.8, 126.3, 125.5, 124.5, 122.9, 121.2, 120.0; HRMS (ESI<sup>+</sup>): calcd for C<sub>22</sub>H<sub>16</sub>N<sub>2</sub>O<sub>3</sub>S [M+Na]<sup>+</sup>: 411.0774, Found: 411.0771.

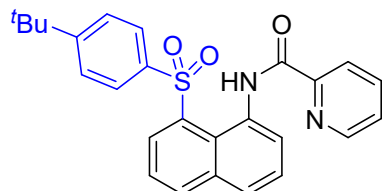

N-(8-(4-(tert-butyl)phenylsulfonyl)naphthalen-1-yl)picolinamide (**3ab**): light yellow solid (42%), mp 198-200 °C; <sup>1</sup>H NMR (400 MHz, CDCl<sub>3</sub>) δ 11.18 (s, 1H), 8.82-8.68 (m, 1H), 8.57 (dd, *J*<sub>1</sub> = 7.48 Hz, *J*<sub>2</sub> = 1.31 Hz, 1H), 8.28-8.19 (m, 1H), 8.00-7.89 (m, 1H), 7.87-7.71 (m, 3H), 7.71-7.56 (m, 2H), 7.51-7.43 (m, 1H), 7.28-7.21 (m, 2H), 7.02-6.98 (m, 2H), 1.15 (s, 9H); <sup>13</sup>C NMR (100 MHz, CDCl<sub>3</sub>) δ 163.9, 155.5, 150.0, 148.1, 139.8, 136.8, 136.7, 136.3, 133.6, 132.7, 131.3, 130.5, 128.7, 127.2, 126.2, 125.4, 124.2, 123.9, 122.6, 34.8, 30.8; HRMS (ESI<sup>+</sup>): calcd for C<sub>26</sub>H<sub>24</sub>N<sub>2</sub>O<sub>3</sub>S [M+H]<sup>+</sup>: 445.1580, Found: 445.1583.

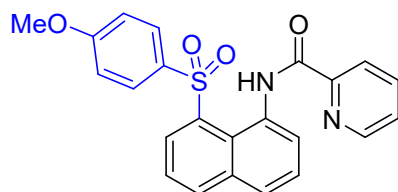

N-(8-(4-methoxyphenylsulfonyl)naphthalen-1-yl)picolinamide (**3ac**): white solid (37%), mp 157-

159 °C; <sup>1</sup>H NMR (400 MHz, CDCl<sub>3</sub>) δ 11.10 (s, 1H), 8.78-8.67 (m, 3H), 8.55 (d, *J* = 8.31 Hz, 1H), 8.37 (d, *J* = 7.79 Hz, 1H), 8.19-8.13 (m, 1H), 8.02-7.95 (m, 1H), 7.93-7.88 (m, 2H), 7.68-7.60 (m, 2H), 7.60-7.54 (m, 1H), 6.96-6.88 (m, 2H), 3.81 (s, 3H); <sup>13</sup>C NMR (100 MHz, CDCl<sub>3</sub>) δ 163.1, 162.3, 149.4, 148.2, 138.1, 138.0, 133.6, 131.9, 130.7, 129.6, 129.3, 128.1, 127.0, 127.0, 126.0, 125.4, 122.7, 120.8, 115.3, 114.3, 55.6; HRMS (ESI<sup>+</sup>): calcd for C<sub>23</sub>H<sub>18</sub>N<sub>2</sub>O<sub>4</sub>S [M+H]<sup>+</sup>: 419.1060, Found: 419.1060.

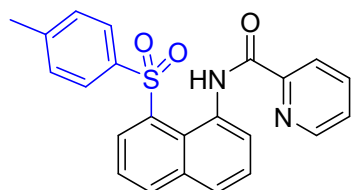

N-(8-(4-methylphenylsulfonyl)naphthalen-1-yl)picolinamide (**3ad**): white solid (47%), mp 200-202 °C; <sup>1</sup>H NMR (400 MHz, CDCl<sub>3</sub>) δ 11.09 (s, 1H), 8.77-8.70 (m, 1H), 8.50 (dd, *J*<sub>1</sub> = 7.49 Hz, *J*<sub>2</sub> = 1.28 Hz, 1H), 8.26-8.18 (m, 1H), 7.98-7.93 (m, 1H), 7.85-7.80 (m, 2H), 7.80-7.74 (m, 1H), 7.70-7.64 (m, 1H), 7.64-7.57 (m, 1H), 7.50-7.43 (m, 1H), 7.24-7.22 (m, 2H), 6.79 (d, *J* = 8.07 Hz, 2H), 7.18 (s, 3H); <sup>13</sup>C NMR (100 MHz, CDCl<sub>3</sub>) δ 164.1, 150.2, 148.1, 142.8, 139.9, 136.7, 136.4, 136.3, 133.4, 133.1, 131.4, 130.6, 128.9, 128.7, 127.2, 126.2, 126.2, 124.7, 123.9, 122.6; HRMS (ESI<sup>+</sup>): calcd for C<sub>23</sub>H<sub>18</sub>N<sub>2</sub>O<sub>3</sub>S [M+H]<sup>+</sup>: 403.1111, Found: 403.1108.

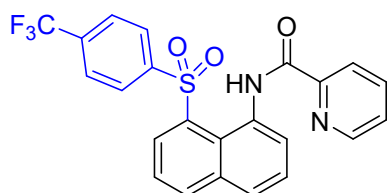

N-(8-(4-(trifluoromethyl)phenylsulfonyl)naphthalen-1-yl)picolinamide (**3ae**): white solid (37%), mp 215-217 °C; <sup>1</sup>H NMR (400 MHz, CDCl<sub>3</sub>) δ 10.89 (s, 1H), 8.75-8.66 (m, 2H), 8.32 (dd, *J*<sub>1</sub> = 8.17 Hz, *J*<sub>2</sub> = 1.16 Hz, 1H), 8.05-7.96 (m, 1H), 7.79-7.66 (m, 5H), 7.53-7.45 (m, 1H), 7.42 (d, *J* = 8.25 Hz, 2H), 7.18 (d, *J* = 8.40 Hz, 2H); <sup>13</sup>C NMR (100 MHz, CDCl<sub>3</sub>) δ 164.0, 149.4, 148.0, 146.7, 137.6, 137.0, 136.4, 134.7, 133.4 (d, *J* = 33.1 Hz), 131.4, 131.0, 129.2, 127.5, 126.7, 126.5, 125.4, 125.3, 124.4, 124.2, 122.7; <sup>19</sup>F NMR (376 MHz, CDCl<sub>3</sub>): δ -63.36 (s, 3F); HRMS (ESI<sup>+</sup>): calcd for C<sub>23</sub>H<sub>15</sub>F<sub>3</sub>N<sub>2</sub>O<sub>3</sub>S [M+H]<sup>+</sup>: 457.0828, Found: 457.0829.

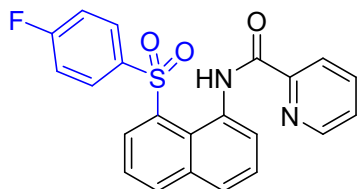

N-(8-(4-fluorophenylsulfonyl)naphthalen-1-yl)picolinamide (**3af**): light yellow solid (32%), mp 220-222 °C; <sup>1</sup>H NMR (400 MHz, CDCl<sub>3</sub>) δ 11.02 (s, 1H), 8.77-8.70 (m, 1H), 8.58-8.49 (m, 1H), 8.31-8.21 (m, 1H), 7.98 (dd, *J*<sub>1</sub> = 8.08 Hz, *J*<sub>2</sub> = 1.08 Hz, 1H), 7.91-7.86 (m, 1H), 7.84-7.78 (m, 2H), 7.73-7.60 (m, 2H), 7.51-7.46 (m, 1H), 7.39-7.34 (m, 2H), 6.72-6.59 (m, 2H); <sup>13</sup>C NMR (100 MHz, CDCl<sub>3</sub>) δ 164.1, 163.1, 149.9, 148.1, 139.0, 137.1, 136.9, 136.4, 133.8, 132.4, 131.3, 130.9,

128.9, 127.3 (d,  $J = 10.93$  Hz), 127.2, 126.4, 126.3, 124.0, 122.7, 115.5 (d,  $J = 22.82$  Hz);  $^{19}\text{F}$  NMR (376 MHz,  $\text{CDCl}_3$ ):  $\delta$  -105.54 (s, 1F); HRMS (ESI $^+$ ): calcd for  $\text{C}_{22}\text{H}_{15}\text{FN}_2\text{O}_3\text{S}$  [ $\text{M}+\text{H}$ ] $^+$ : 407.0860, Found: 407.0861.

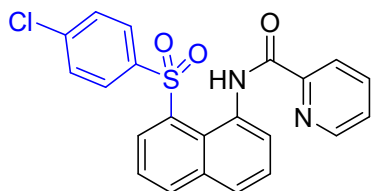

N-(8-(4-chlorophenylsulfonyl)naphthalen-1-yl)picolinamide (**3ag**): light yellow solid (62%), mp 208-210 °C;  $^1\text{H}$  NMR (400 MHz,  $\text{CDCl}_3$ )  $\delta$  10.94 (s, 1H), 8.73-8.69 (m, 1H), 8.63-8.56 (m, 1H), 8.34-8.23 (m, 1H), 7.99 (dd,  $J_1 = 8.08$  Hz,  $J_2 = 1.11$  Hz, 1H), 7.85-7.76 (m, 3H), 7.73-7.62 (m, 2H), 7.52-7.47 (m, 1H), 7.26-7.23 (m, 2H), 6.96-6.85 (m, 2H);  $^{13}\text{C}$  NMR (100 MHz,  $\text{CDCl}_3$ )  $\delta$  164.1, 149.8, 148.0, 141.6, 138.3, 137.3, 136.8, 136.3, 134.1, 131.9, 131.2, 131.1, 129.0, 128.5, 127.4, 126.5, 126.5, 125.7, 124.0, 122.8; HRMS (ESI $^+$ ): calcd for  $\text{C}_{22}\text{H}_{15}\text{ClN}_2\text{O}_3\text{S}$  [ $\text{M}+\text{H}$ ] $^+$ : 423.0565, Found: 423.0562.

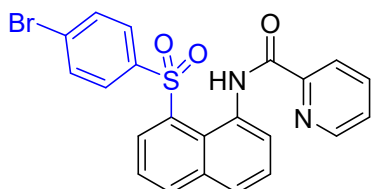

N-(8-(4-bromophenylsulfonyl)naphthalen-1-yl)picolinamide (**3ah**): light yellow solid (48%), mp 192-197 °C;  $^1\text{H}$  NMR (400 MHz,  $\text{CDCl}_3$ )  $\delta$  10.92 (s, 1H), 8.70 (d,  $J = 4.60$  Hz, 1H), 8.60 (d,  $J = 6.89$  Hz, 1H), 8.28 (d,  $J = 7.82$  Hz, 1H), 7.99 (d,  $J = 7.70$  Hz, 1H), 7.85-7.77 (m, 3H), 7.74-7.63 (m, 2H), 7.52-7.46 (m, 1H), 7.22-7.16 (m, 2H), 7.09-7.04 (m, 2H);  $^{13}\text{C}$  NMR (100 MHz,  $\text{CDCl}_3$ )  $\delta$  164.1, 149.8, 148.0, 142.2, 137.3, 136.8, 136.4, 134.2, 131.8, 131.4, 131.2, 129.0, 127.4, 126.8, 126.6, 126.5, 125.7, 124.1, 122.8; HRMS (ESI $^+$ ): calcd for  $\text{C}_{22}\text{H}_{15}\text{BrN}_2\text{O}_3\text{S}$  [ $\text{M}+\text{H}$ ] $^+$ : 467.0060, Found: 467.0059.

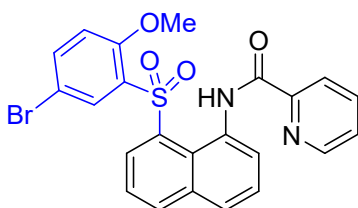

N-(8-(2-methoxy-5-bromophenylsulfonyl)naphthalen-1-yl)picolinamide (**3ai**): yellow solid (20%), mp 206-208 °C;  $^1\text{H}$  NMR (400 MHz,  $\text{CDCl}_3$ )  $\delta$  11.10 (s, 1H), 8.76 (d,  $J = 4.15$  Hz, 1H), 8.63 (d,  $J = 7.30$  Hz, 1H), 8.20 (d,  $J = 7.72$  Hz, 1H), 8.04 (d,  $J = 7.75$  Hz, 1H), 7.92 (d,  $J = 7.99$  Hz, 1H), 7.84 (d,  $J = 7.49$  Hz, 2H), 7.67-7.65 (m, 4H), 7.50-7.45 (m, 1H), 6.48 (d,  $J = 8.83$  Hz, 1H), 3.34 (s, 3H);  $^{13}\text{C}$  NMR (100 MHz,  $\text{CDCl}_3$ )  $\delta$  164.2, 154.7, 149.8, 148.3, 137.1, 136.8, 136.4, 136.1, 135.4, 133.4, 132.5, 131.6, 130.0, 129.7, 128.5, 127.0, 126.4, 125.9, 124.0, 123.0, 113.8, 112.2, 56.0; HRMS (ESI $^+$ ): calcd for  $\text{C}_{23}\text{H}_{17}\text{BrN}_2\text{O}_4\text{S}$  [ $\text{M}+\text{H}$ ] $^+$ : 497.0165, Found: 497.0163.

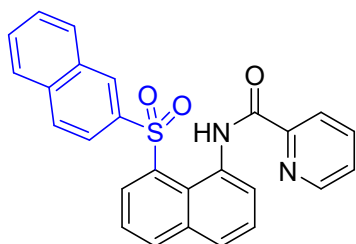

N-(8-(naphthalen-2-ylsulfonyl)naphthalen-1-yl)picolinamide (**3aj**): yellow solid (50%), mp 222-224 °C;  $^1\text{H}$  NMR (400 MHz,  $\text{CDCl}_3$ )  $\delta$  11.04 (s, 1H), 8.68 (d,  $J = 4.28$  Hz, 1H), 8.59 (d,  $J = 7.25$  Hz, 1H), 8.28 (d,  $J = 8.02$  Hz, 1H), 7.99 (d,  $J = 7.68$  Hz, 1H), 7.95 (s, 1H), 7.78 (d,  $J = 7.49$  Hz, 1H), 7.73-7.59 (m, 3H), 7.53-7.48 (m, 2H), 7.46-7.27 (m, 6H);  $^{13}\text{C}$  NMR (100 MHz,  $\text{CDCl}_3$ )  $\delta$  164.2, 149.6, 147.9, 140.0, 136.9, 136.4, 134.3, 133.9, 132.8, 131.5, 131.4, 130.8, 129.1, 128.9, 128.7, 128.4, 127.6, 127.3, 127.1, 126.6, 126.1, 125.5, 124.0, 122.2, 120.4; HRMS (ESI $^+$ ): calcd for  $\text{C}_{26}\text{H}_{18}\text{N}_2\text{O}_3\text{S}$  [ $\text{M}+\text{H}$ ] $^+$ : 439.1111, Found: 439.1112.

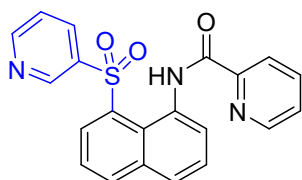

N-(8-(3-pyridylsulfonyl)naphthalen-1-yl)picolinamide (**3ak**): yellow solid (23%), mp 172-174 °C;  $^1\text{H}$  NMR (400 MHz,  $\text{CDCl}_3$ )  $\delta$  11.19 (s, 1H), 9.20 (d,  $J = 2.02$  Hz, 1H), 8.82-8.76 (m, 1H), 8.76 - 8.70 (m, 3H), 8.67-8.61 (m, 1H), 8.40-8.35 (m, 1H), 8.24-8.17 (m, 2H), 8.02-7.96 (m, 1H), 7.72-7.65 (m, 2H), 7.61-7.56 (m, 1H), 7.43-7.38 (m, 1H);  $^{13}\text{C}$  NMR (100 MHz,  $\text{CDCl}_3$ )  $\delta$  162.3, 153.4, 149.2, 148.3, 139.0, 138.6, 138.0, 134.9, 131.8, 130.0, 129.3, 128.7, 127.3, 127.1, 125.9, 124.8, 123.6, 122.8, 121.0, 115.1; HRMS (ESI $^+$ ): calcd for  $\text{C}_{21}\text{H}_{15}\text{N}_3\text{O}_3\text{S}$  [ $\text{M}+\text{Na}$ ] $^+$ : 412.0726, Found: 412.0727.

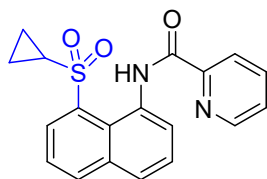

N-(8-(cyclopropylsulfonyl)naphthalen-1-yl)picolinamide (**3al**): white solid (53%), mp 184-186 °C;  $^1\text{H}$  NMR (400 MHz,  $\text{CDCl}_3$ )  $\delta$  11.83 (s, 1H), 8.85-8.77 (m, 1H), 8.43-8.34 (m, 1H), 8.28 (d,  $J = 7.88$  Hz, 1H), 8.20-8.13 (m, 1H), 8.06 (d,  $J = 7.54$  Hz, 1H), 7.96-7.86 (m, 2H), 7.74-7.66 (m, 1H), 7.59-7.49 (m, 2H), 2.94-2.80 (m, 1H), 1.30-1.25 (m, 2H), 0.82-0.69 (m, 2H);  $^{13}\text{C}$  NMR (100 MHz,  $\text{CDCl}_3$ )  $\delta$  164.6, 150.1, 148.6, 137.3, 136.3, 136.2, 135.3, 131.7, 131.0, 129.5, 128.6, 126.9, 126.5, 125.3, 123.9, 123.0, 33.3, 6.6; HRMS (ESI $^+$ ): calcd for  $\text{C}_{19}\text{H}_{16}\text{N}_2\text{O}_3\text{S}$  [ $\text{M}+\text{H}$ ] $^+$ : 353.0954, Found: 353.0952.

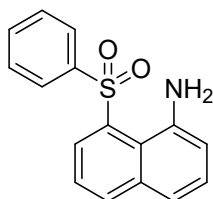

8-phenylsulfonyl-1-naphthylamine (**4a**): yellow paste (85%), mp 50 °C; <sup>1</sup>H NMR (400 MHz, CDCl<sub>3</sub>) δ 8.51 (d, *J* = 7.51 Hz, *J* = 1.13 Hz, 1H), 8.09-7.96 (m, 1H), 7.76-7.65 (m, 2H), 7.56-7.41 (m, 4H), 7.36-7.27 (m, 2H), 6.79-6.70 (m, 1H), 5.29 (s, 2H); <sup>13</sup>C NMR (100 MHz, CDCl<sub>3</sub>) δ 142.8, 142.7, 136.9, 136.6, 134.8, 132.5, 131.4, 128.8, 127.7, 126.4, 123.4, 119.7, 119.6, 115.5; HRMS (ESI<sup>+</sup>): calcd for C<sub>16</sub>H<sub>13</sub>NO<sub>2</sub>S [M+H]<sup>+</sup>: 284.0740, Found: 284.0740.

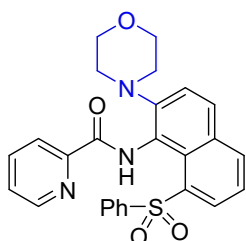

N-(2-morpholine-8-(phenylsulfonyl)naphthalen-1-yl)picolinamide (**5a**): yellow solid (76%), mp 228-230 °C; <sup>1</sup>H NMR (400 MHz, CDCl<sub>3</sub>) δ 10.25 (s, 1H), 8.68-8.60 (m, 1H), 8.59-8.48 (m, 1H), 8.18-8.11 (m, 1H), 7.97 (d, *J* = 8.48 Hz, 1H), 7.75-7.62 (m, 2H), 7.56-7.48 (m, 2H), 7.46-7.40 (m, 3H), 7.16-7.07 (m, 1H), 7.00-6.88 (m, 2H), 3.51-3.42 (m, 2H), 3.42-3.33 (m, 2H), 3.31-3.22 (m, 2H), 2.95-2.85 (m, 2H); <sup>13</sup>C NMR (100 MHz, CDCl<sub>3</sub>) δ 163.7, 151.3, 150.0, 147.8, 143.9, 136.7, 136.4, 135.0, 132.5, 131.8, 131.6, 130.5, 130.2, 128.1, 126.1, 124.2, 124.0, 122.5, 121.5, 67.1, 51.5; HRMS (ESI<sup>+</sup>): calcd for C<sub>26</sub>H<sub>23</sub>N<sub>3</sub>O<sub>4</sub>S [M+H]<sup>+</sup>: 474.1482, Found: 474.1483.

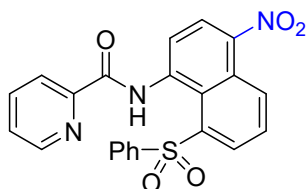

N-(4-nitro-8-(phenylsulfonyl)naphthalen-1-yl)picolinamide (**6a**): yellow solid (40%), mp 225-227 °C; <sup>1</sup>H NMR (400 MHz, CDCl<sub>3</sub>) δ 11.41 (s, 1H), 8.86-8.70 (m, 2H), 8.62-8.52 (m, 1H), 8.29-8.20 (m, 1H), 8.03-7.95 (m, 1H), 7.95-7.88 (m, 2H), 7.86-7.77 (m, 2H), 7.56-7.48 (m, 1H), 7.42-7.29 (m, 3H), 7.18-7.05 (m, 2H); <sup>13</sup>C NMR (100 MHz, CDCl<sub>3</sub>) δ 164.1, 149.3, 148.3, 145.9, 141.7, 137.1, 137.0, 134.8, 133.9, 132.8, 130.3, 128.7, 128.0, 127.6, 126.9, 126.8, 126.2, 125.1, 124.5, 123.0; HRMS (ESI<sup>+</sup>): calcd for C<sub>22</sub>H<sub>15</sub>N<sub>3</sub>O<sub>5</sub>S [M+H]<sup>+</sup>: 434.0805, Found: 434.0802.

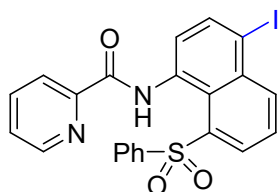

N-(4-iodo-8-(phenylsulfonyl)naphthalen-1-yl)picolinamide (**7a**): red solid (43%), mp 220-222 °C;

$^1\text{H}$  NMR (400 MHz,  $\text{CDCl}_3$ )  $\delta$  10.55 (s, 1H), 8.80 (s, 1H), 8.72-8.64 (m, 1H), 8.55-8.47 (m, 1H), 8.30-8.22 (m, 1H), 7.83-7.76 (m, 1H), 7.76-7.68 (m, 1H), 7.66-7.59 (m, 1H), 7.59-7.51 (m, 2H), 7.49-7.41 (m, 1H), 7.27-7.22 (m, 2H), 7.17-7.06 (m, 2H);  $^{13}\text{C}$  NMR (100 MHz,  $\text{CDCl}_3$ )  $\delta$  164.0, 149.2, 148.0, 148.0, 142.2, 140.3, 136.8, 136.1, 135.8, 134.7, 134.7, 132.5, 129.9, 128.4, 126.5, 126.2, 125.6, 122.7, 105.9, 100.8; HRMS ( $\text{ESI}^+$ ): calcd for  $\text{C}_{22}\text{H}_{15}\text{N}_2\text{O}_3\text{S}$   $[\text{M}+\text{H}]^+$ : 514.9921, Found: 514.9920.

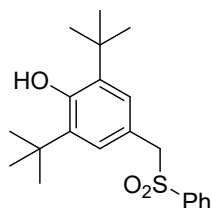

2, 6-ditert-butyl-4-phenylsulfonylmethylphenol (**8a**): yellow solid (51%), mp 114-115 °C;  $^1\text{H}$  NMR (400 MHz,  $\text{CDCl}_3$ )  $\delta$  7.66-7.51 (m, 3H), 7.48-7.34 (m, 2H), 6.74 (s, 2H), 5.24 (s, 1H), 4.22 (s, 2H), 1.31 (s, 18H);  $^{13}\text{C}$  NMR (100 MHz,  $\text{CDCl}_3$ )  $\delta$  154.2, 137.8, 136.0, 133.3, 128.8, 128.6, 127.6, 118.7, 63.1, 34.1, 30.0; HRMS ( $\text{ESI}^+$ ): calcd for  $\text{C}_{21}\text{H}_{28}\text{O}_3\text{S}$   $[\text{M}+\text{Na}]^+$ : 383.1651, Found: 383.1652.

## 5. References

- [1]. R. Shang, L. Ilies and E. Nakamura, *J. Am. Chem. Soc.* 2015, **137**, 7660.
- [2]. (a) B. Du, P. Qian, Y. Wang, H. Mei, J. Han, Y. Pan, *Org. Lett.* 2016, **18**, 4144; (b) P. R. Bai, S. Y. Sun, Z. X. Li, H. J. Qiao, X. X. Su, F. Yang, Y. S. Wu and Y. J. Wu, *J. Org. Chem.* 2017, **82**, 12119.

## 6. The Single Crystal X-ray Diffraction Study

The Single Crystal X-ray Diffraction Study of **3aa**

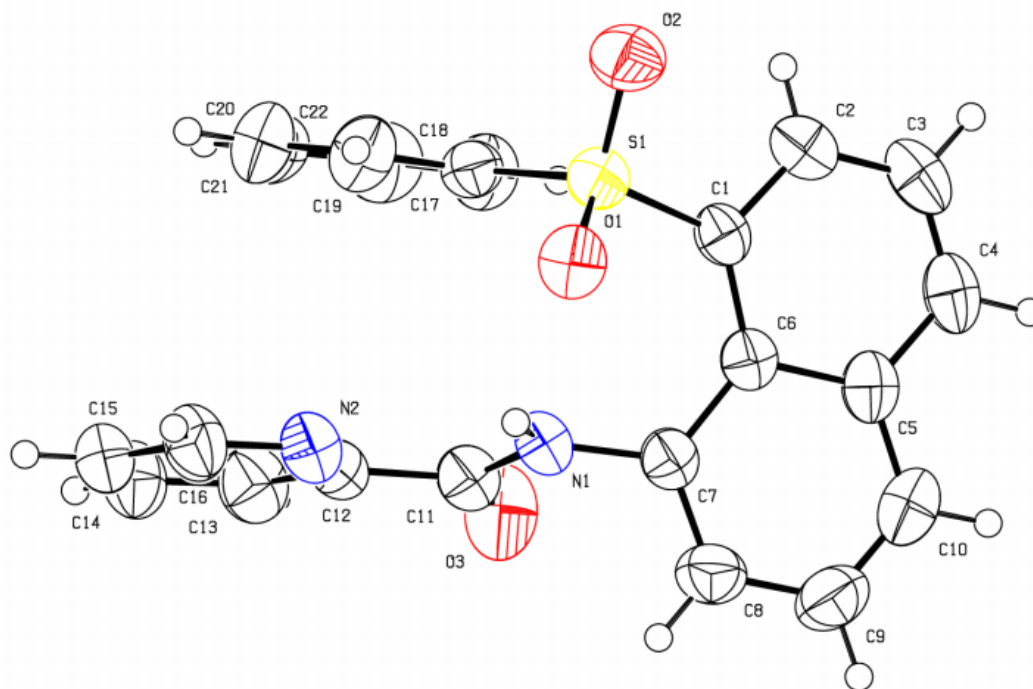

CCDC 2078508 (**3aa**) contains the supplementary crystallographic data for this paper. These data can be obtained free of charge from The Cambridge Crystallographic Data Centre *via* [www.ccdc.cam.ac.uk/data\\_request/cif](http://www.ccdc.cam.ac.uk/data_request/cif).

**Table S3 Crystal Data and Structure Refinement for CCDC 2078508.**

|                                    |                                                                 |
|------------------------------------|-----------------------------------------------------------------|
| Empirical formula                  | C <sub>22</sub> H <sub>16</sub> N <sub>2</sub> O <sub>3</sub> S |
| Formula weight                     | 388.43                                                          |
| Temperature/K                      | 293(2)                                                          |
| Crystal system                     | monoclinic                                                      |
| Space group                        | P2 <sub>1</sub> /c                                              |
| a/Å                                | 8.8921(4)                                                       |
| b/Å                                | 14.4512(7)                                                      |
| c/Å                                | 14.9303(6)                                                      |
| α/°                                | 90                                                              |
| β/°                                | 105.182(4)                                                      |
| γ/°                                | 90                                                              |
| Volume/Å <sup>3</sup>              | 1851.62 (14)                                                    |
| Z                                  | 4                                                               |
| ρ <sub>calc</sub> /cm <sup>3</sup> | 1.393                                                           |



|                                                |                                                               |
|------------------------------------------------|---------------------------------------------------------------|
| $\mu/\text{mm}^{-1}$                           | 1.775                                                         |
| F(000)                                         | 808.0                                                         |
| Crystal size/ $\text{mm}^3$                    | $0.15 \times 0.12 \times 0.1$                                 |
| Radiation                                      | $\text{CuK}\alpha$ ( $\lambda = 1.54184$ )                    |
| $2\Theta$ range for data collection/ $^\circ$  | 8.666 to 134.02                                               |
| Index ranges                                   | $-10 \leq h \leq 8, -16 \leq k \leq 17, -17 \leq l \leq 17$   |
| Reflections collected                          | 7015                                                          |
| Independent reflections                        | 3301 [ $R_{\text{int}} = 0.0249, R_{\text{sigma}} = 0.0339$ ] |
| Data/restraints/parameters                     | 3301/1/257                                                    |
| Goodness-of-fit on $F^2$                       | 1.035                                                         |
| Final R indexes [ $I \geq 2\sigma(I)$ ]        | $R_1 = 0.0486, wR_2 = 0.1342$                                 |
| Final R indexes [all data]                     | $R_1 = 0.0580, wR_2 = 0.1457$                                 |
| Largest diff. peak/hole / $e \text{ \AA}^{-3}$ | 0.35/-0.29                                                    |

## 7. Copies of $^1\text{H}, ^{13}\text{C}$ NMR Spectra for the Products

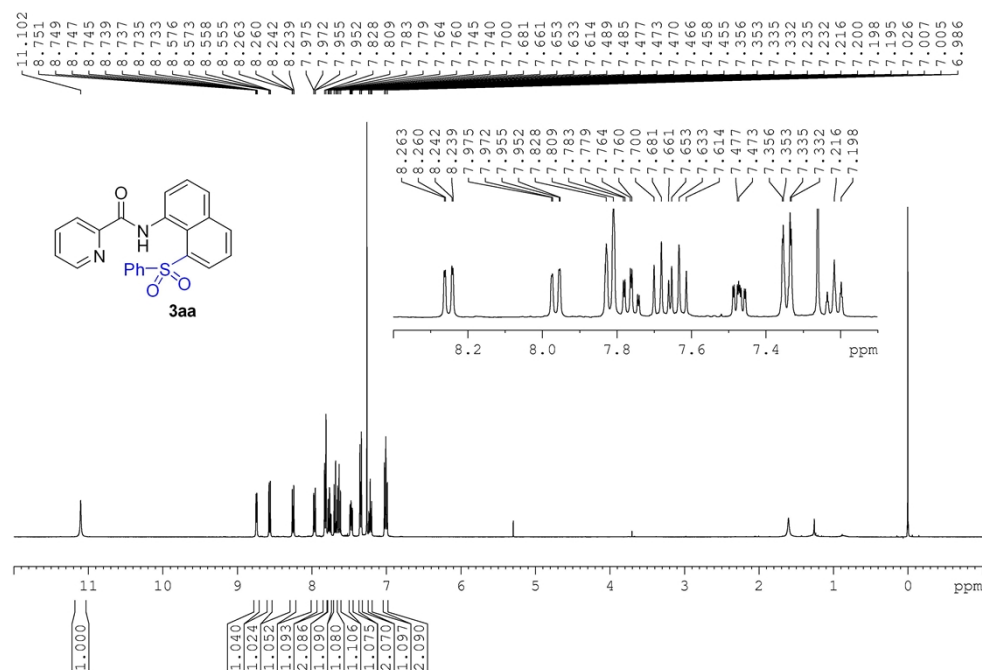

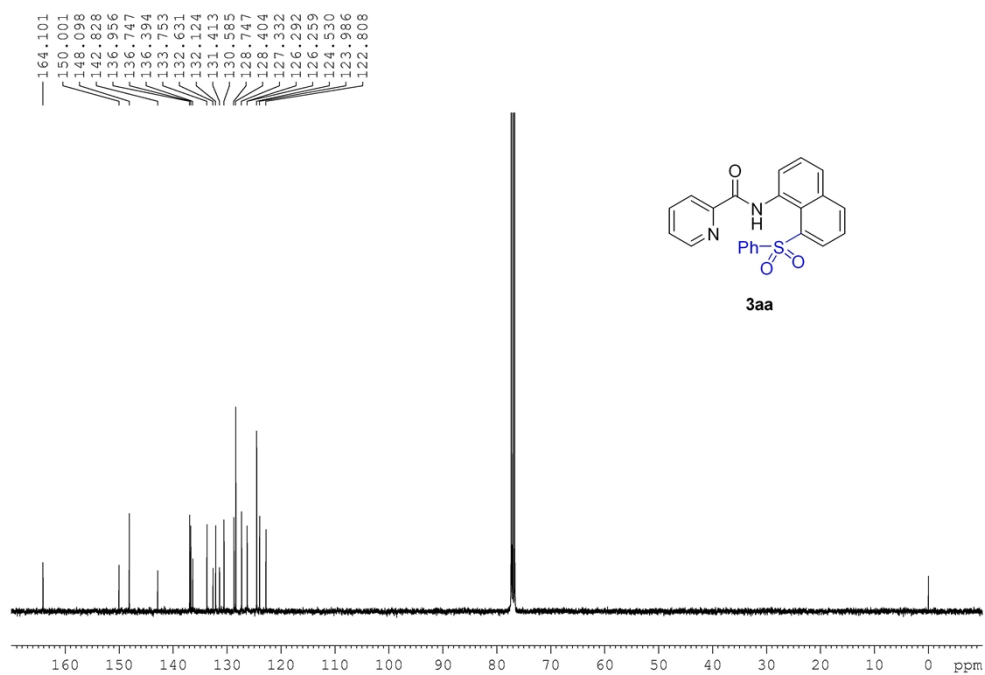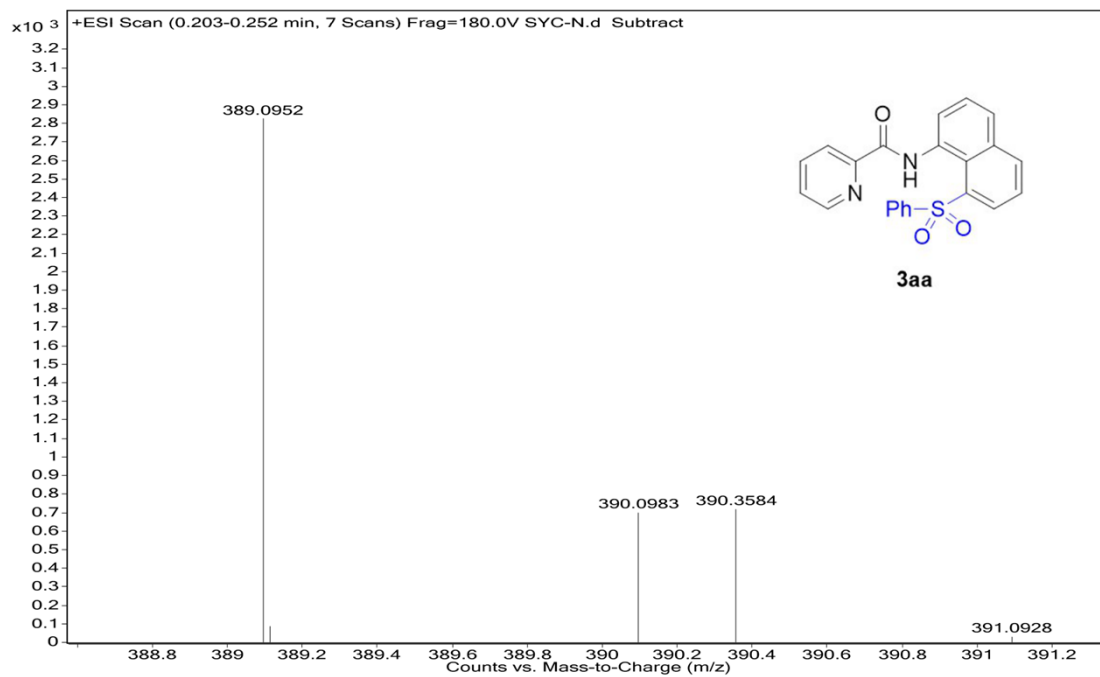

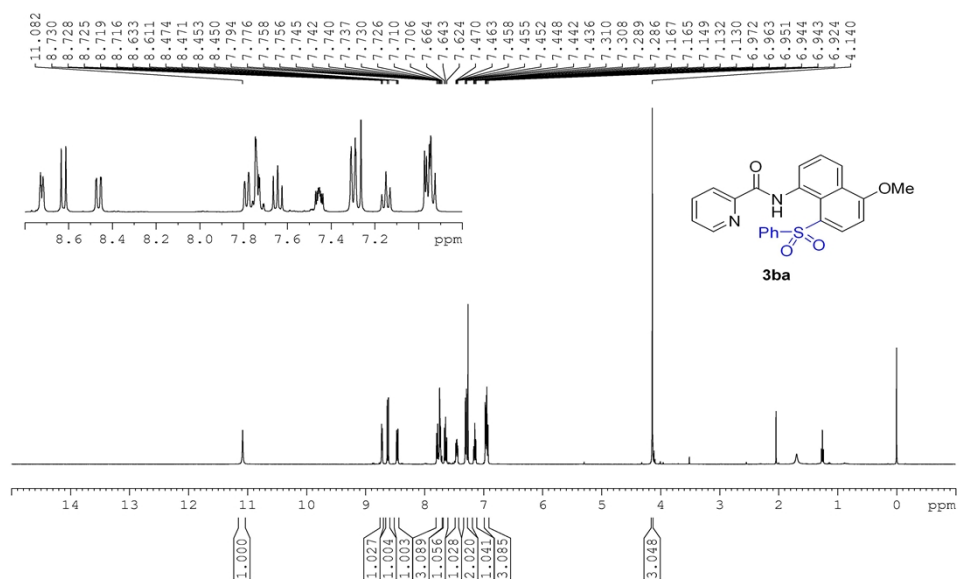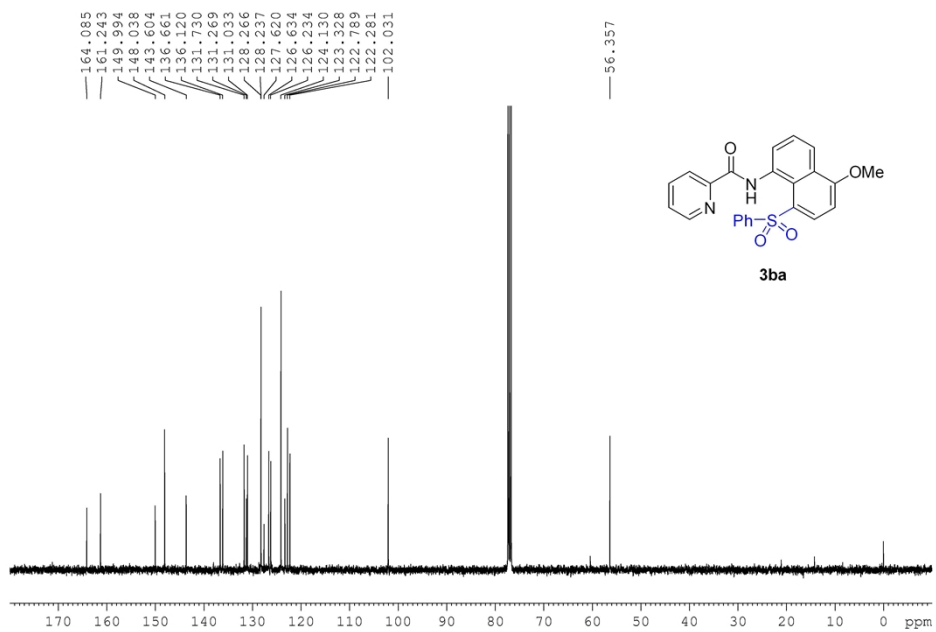

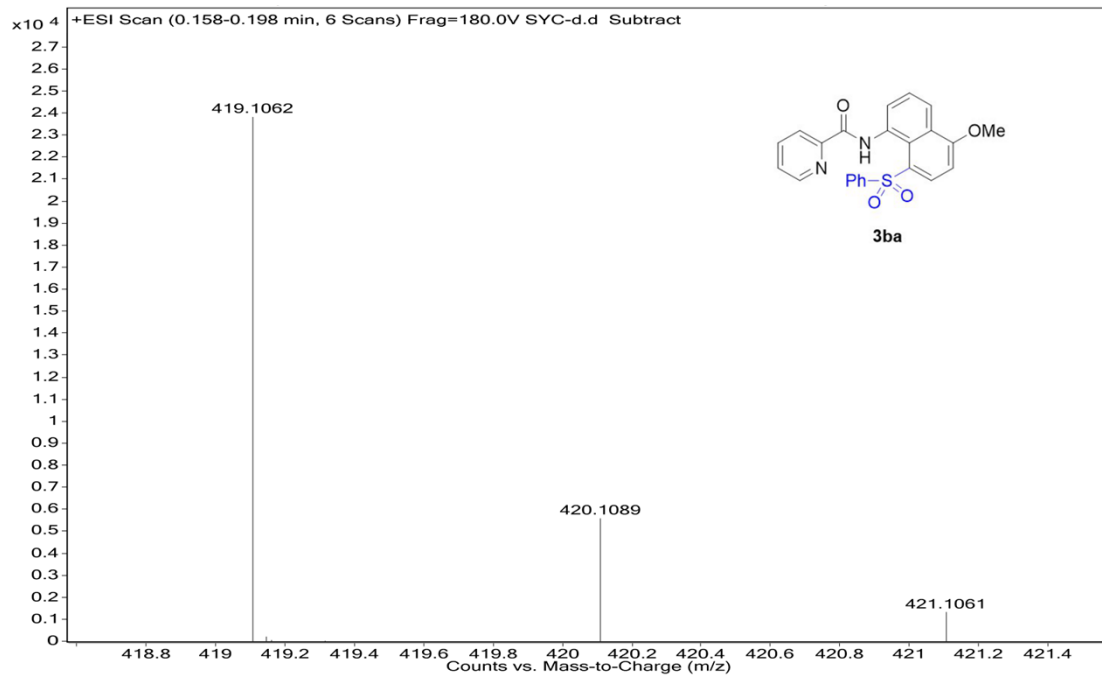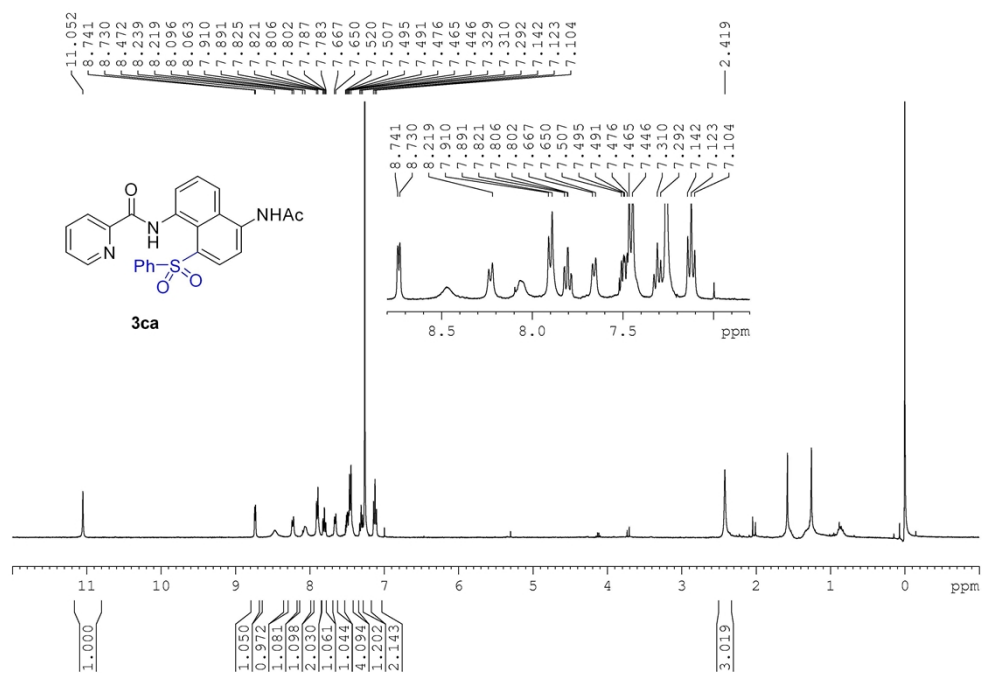

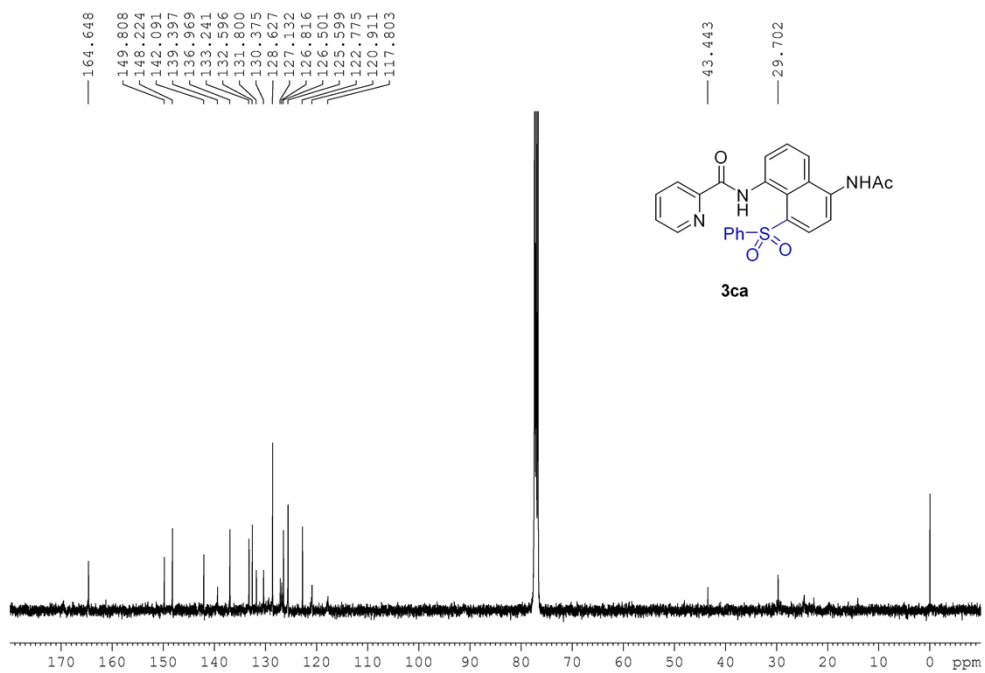

2021-WYJ-7 3 (0.056) AM (Cen,2, 80.00, Ht,5000.0,0.00,1.00); Sm (Mn, 2x3.00); Cm (2:29)

TOF MS ES+  
1.23e3

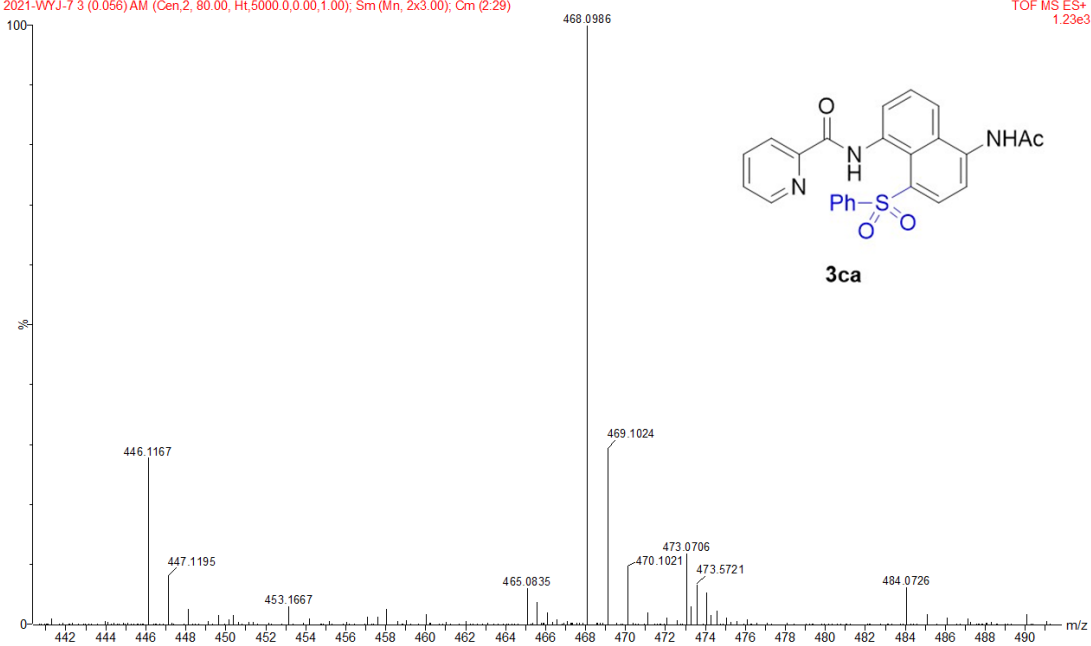

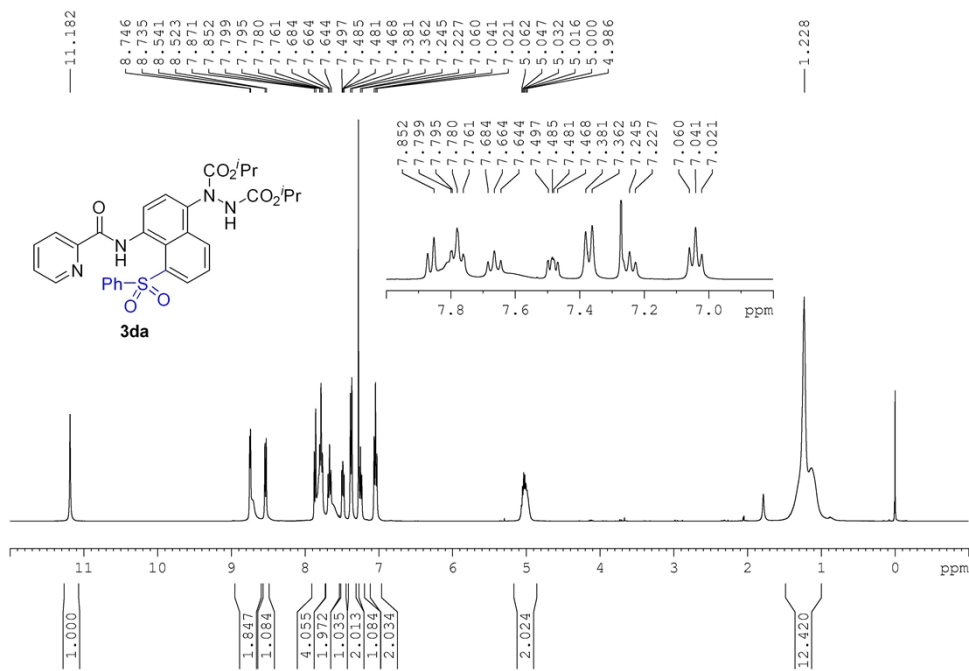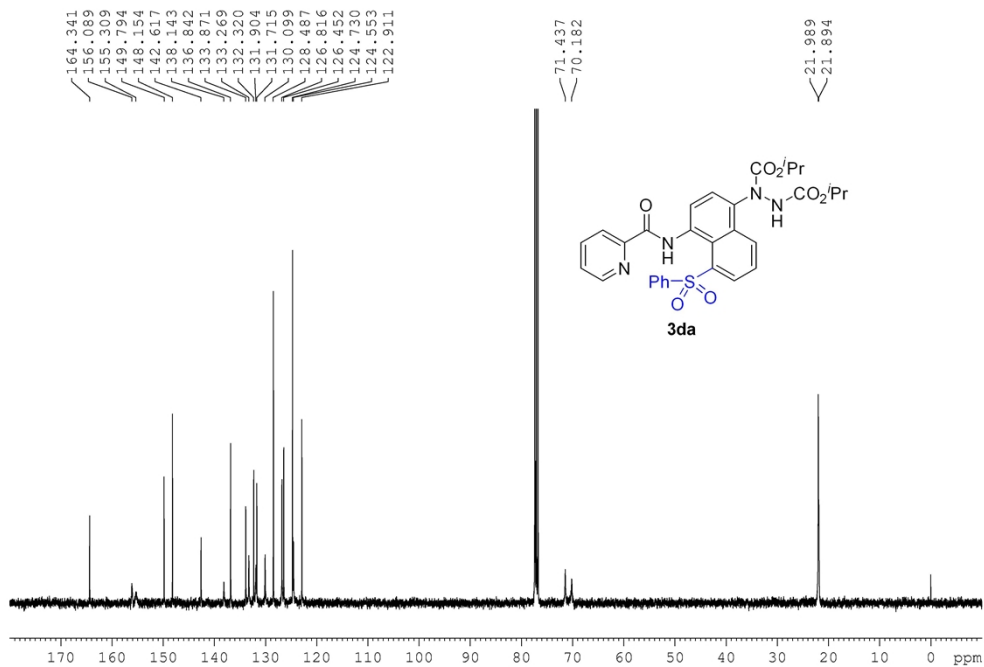

2021-WYJ-5 24 (0.445) AM (Cen, 2, 80.00, Ht, 5000.0, 0.00, 1.00); Sm (Mn, 2x3.00); Cm (2.31)

TOF MS ES+  
1.79e3

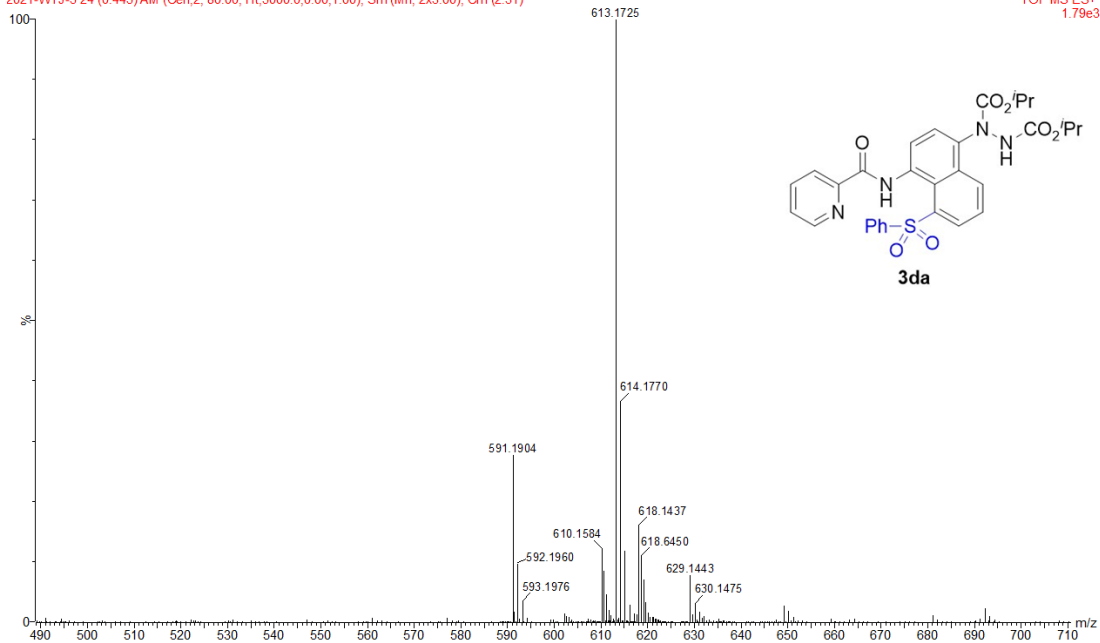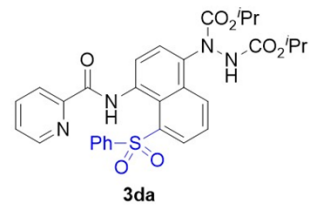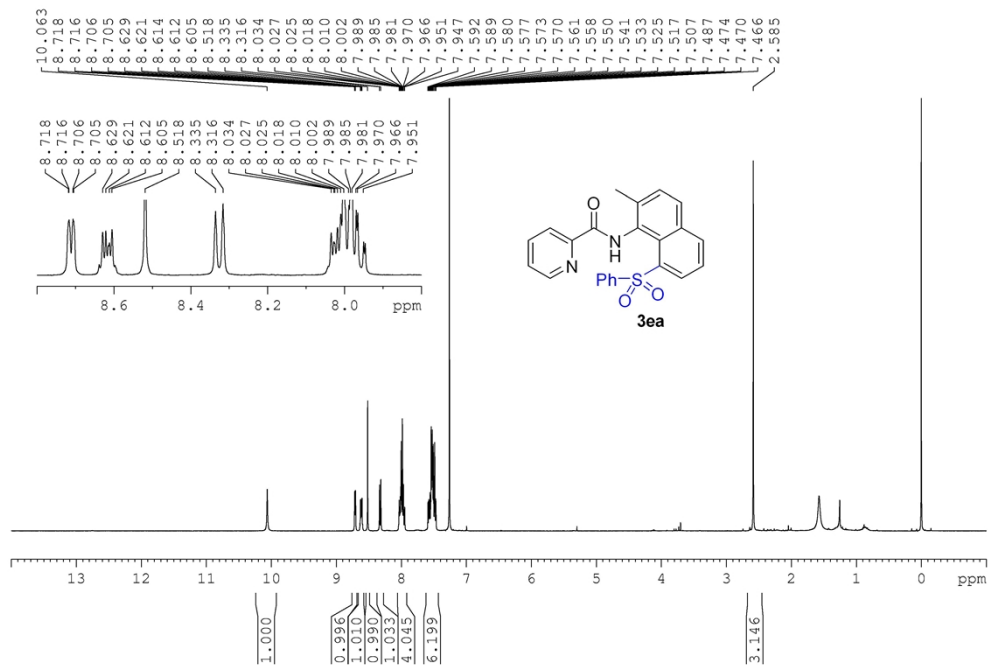

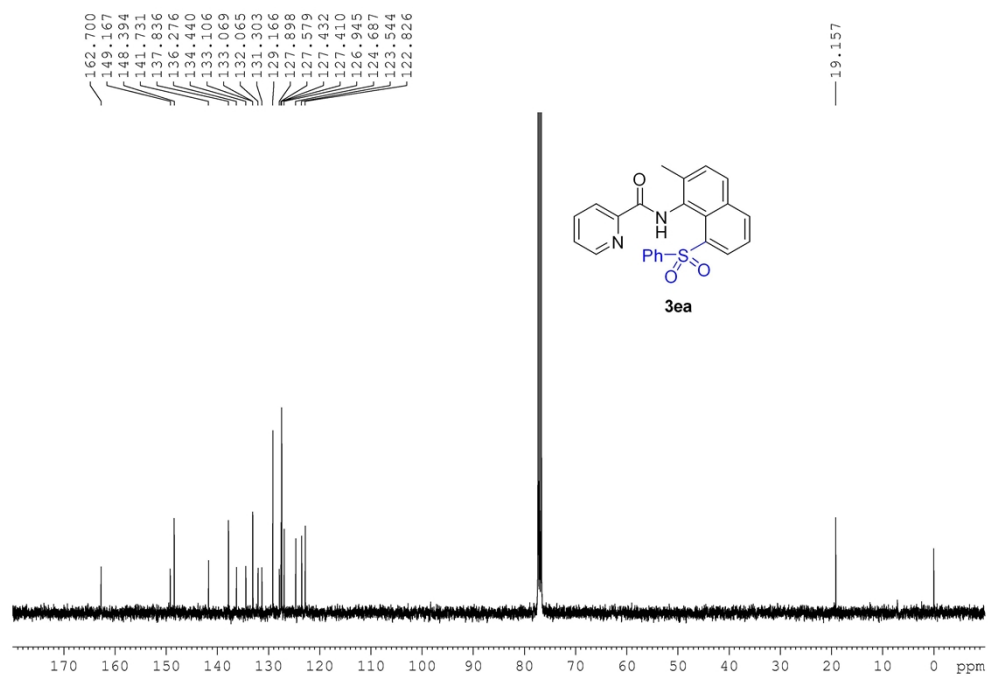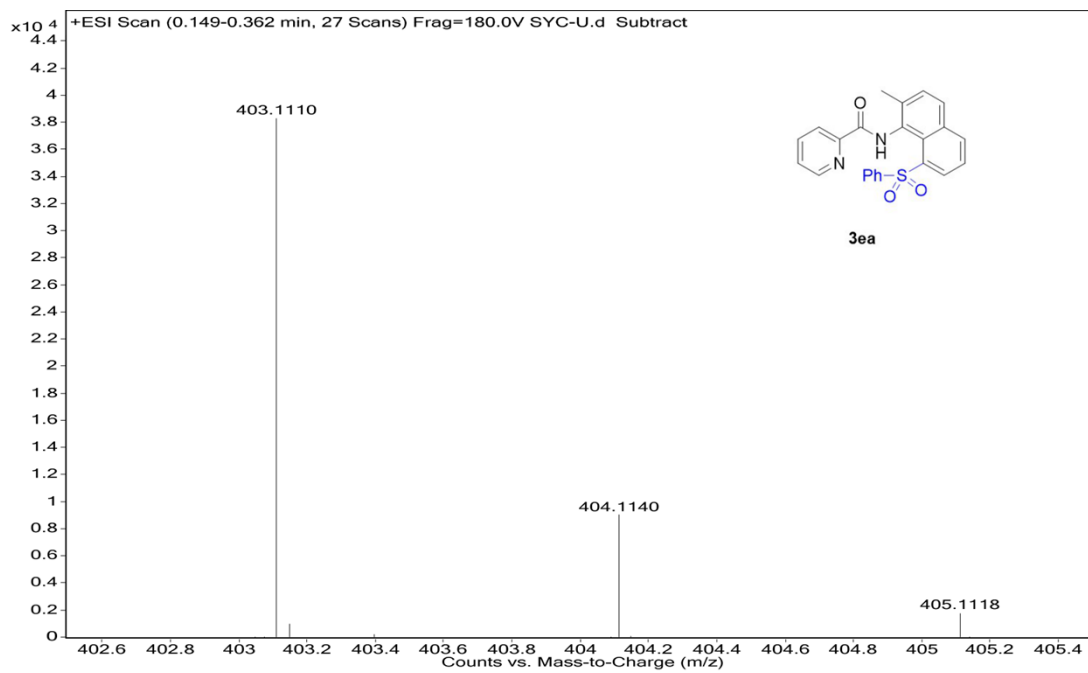



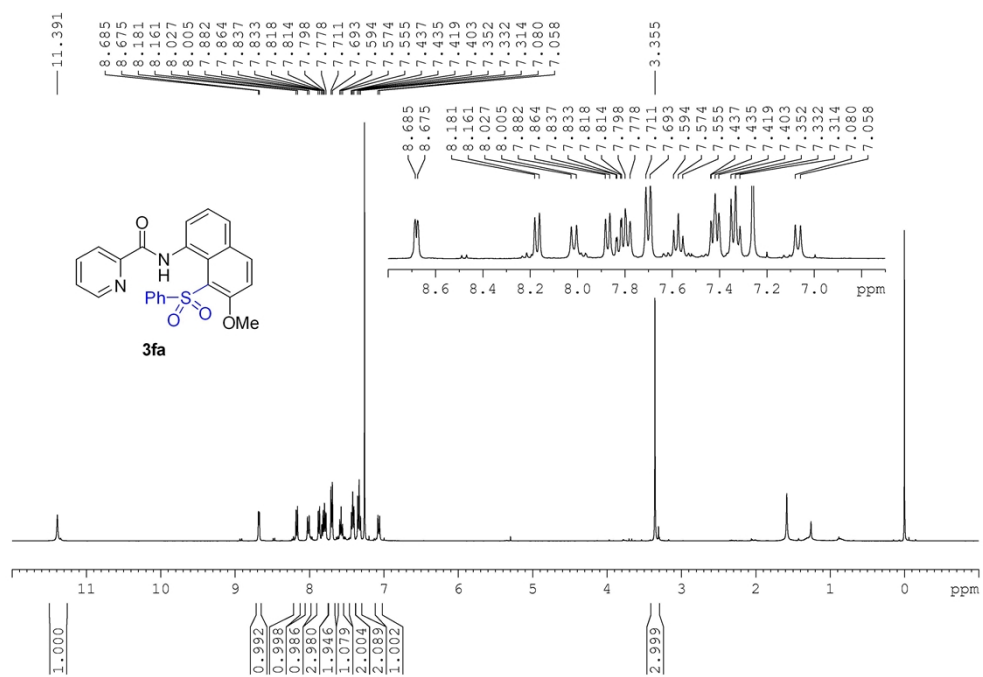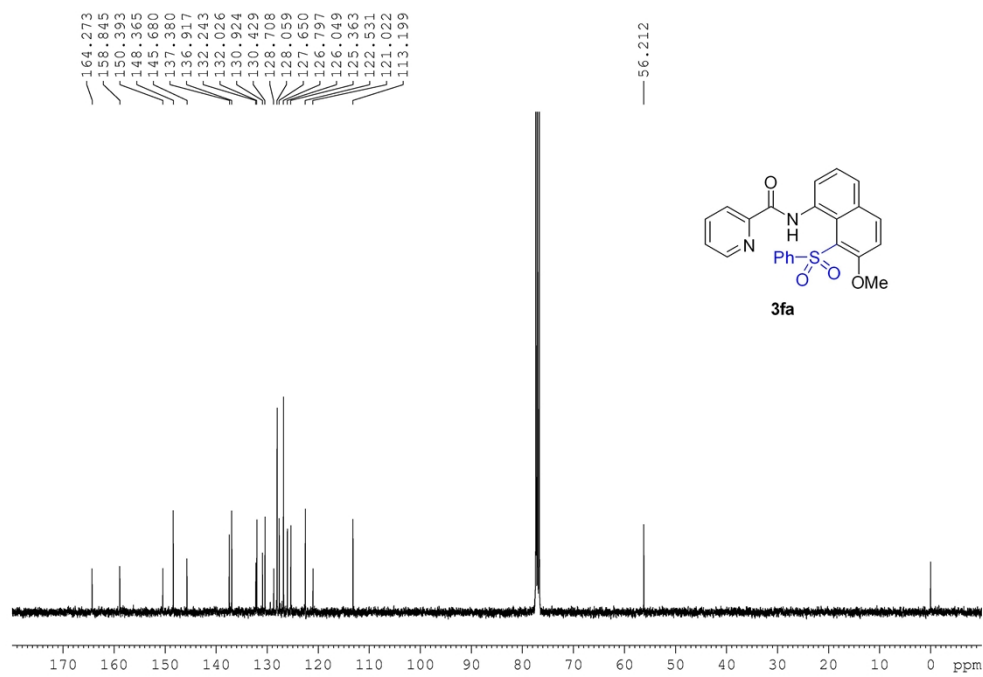

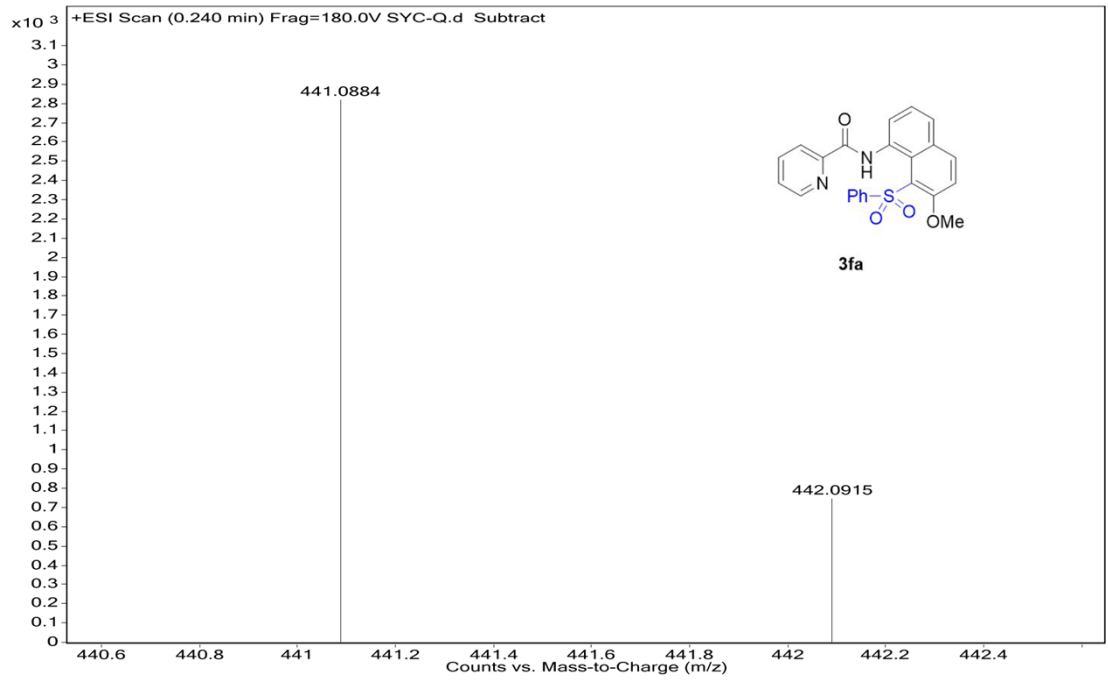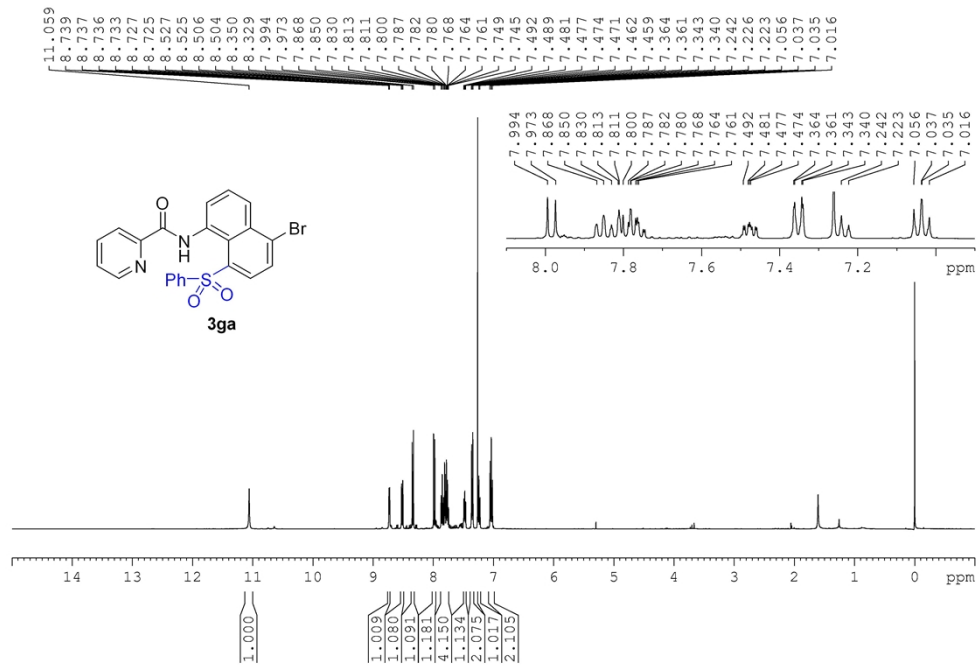

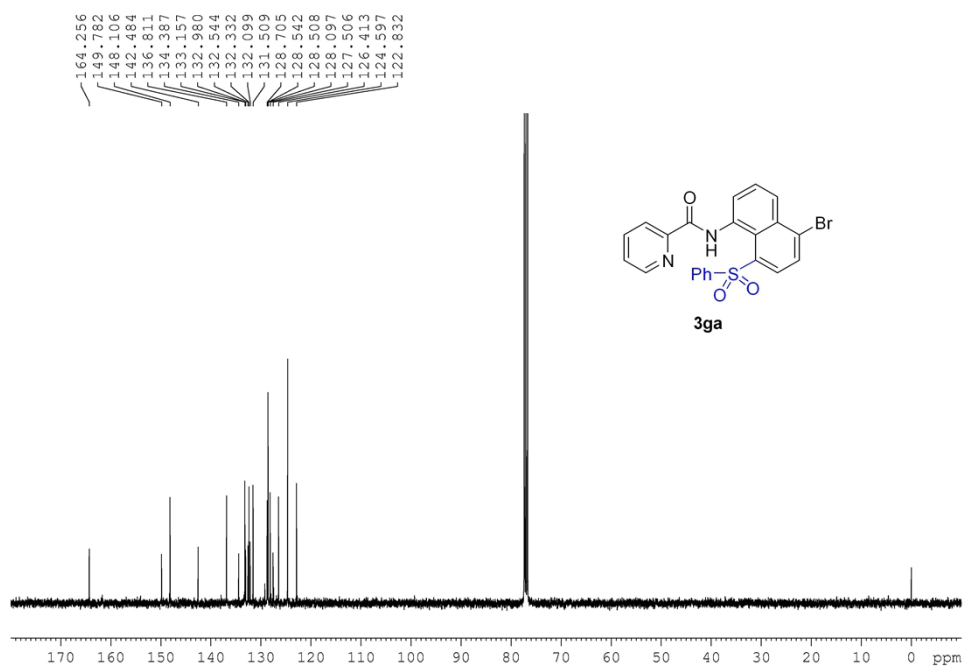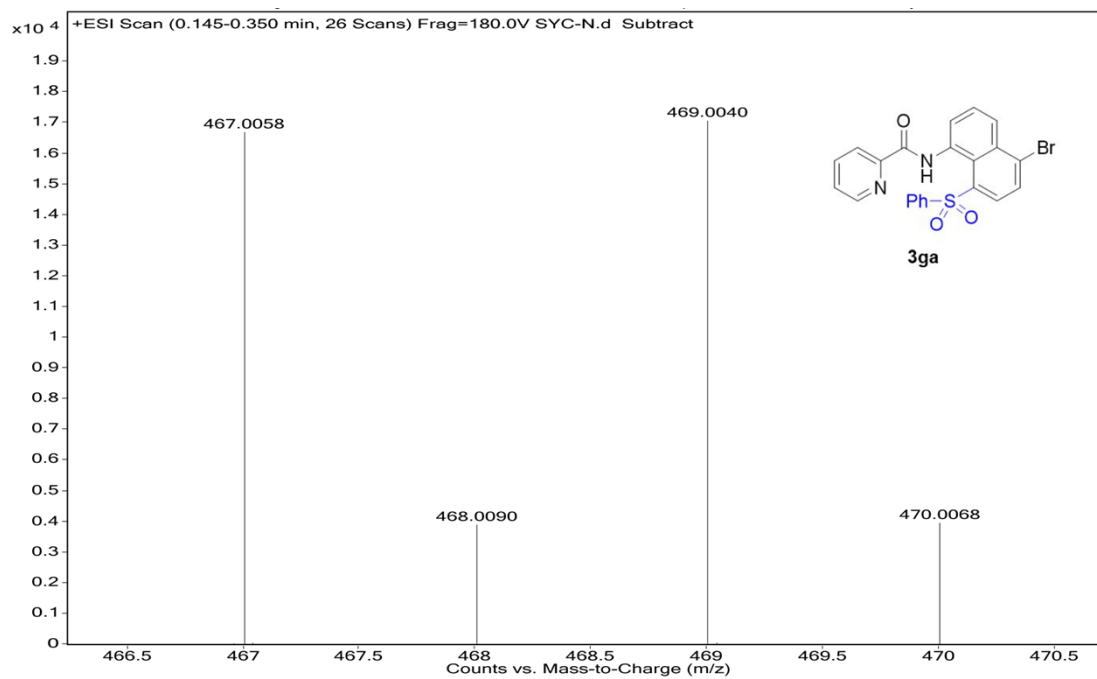

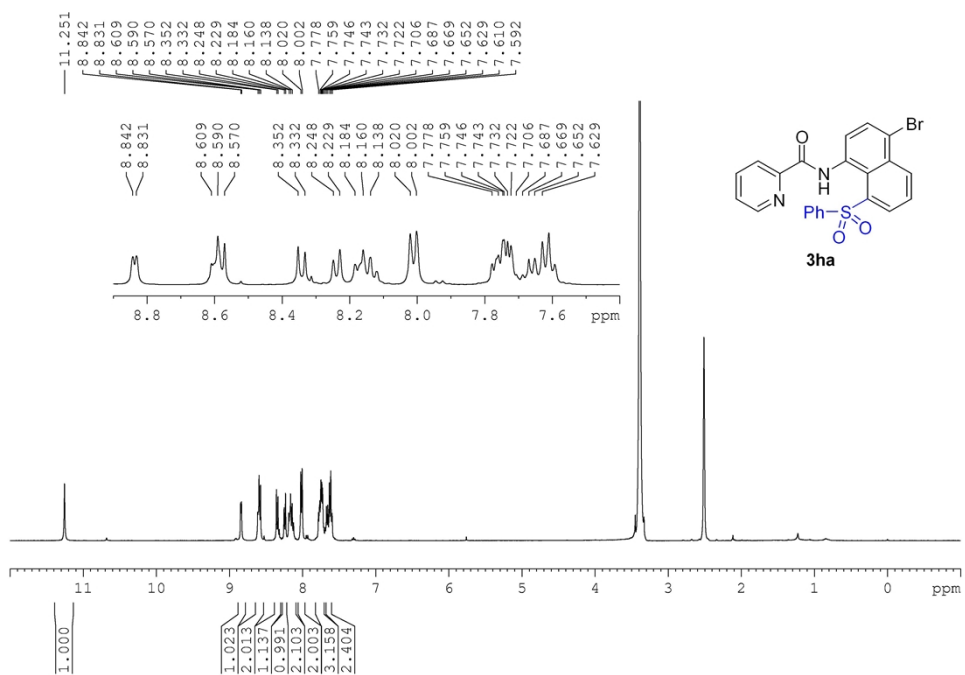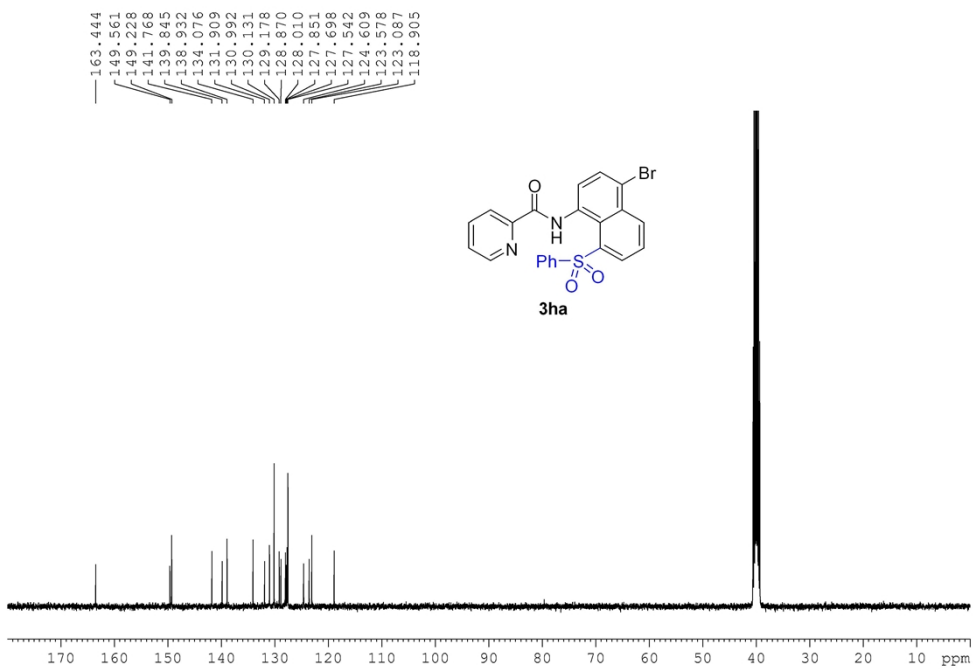

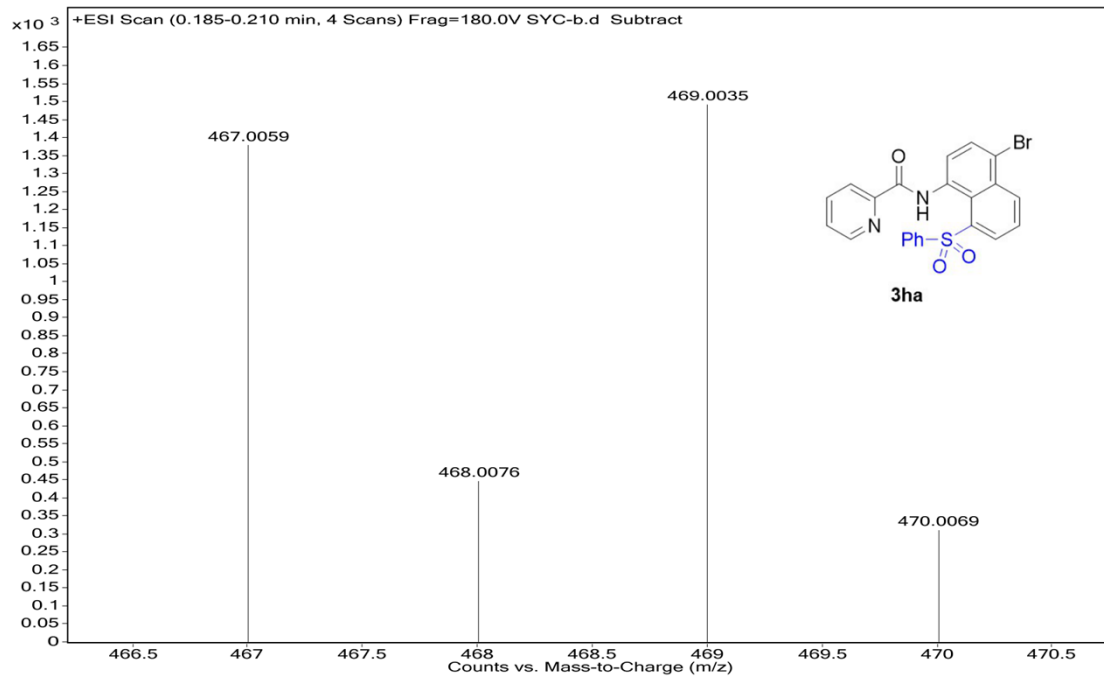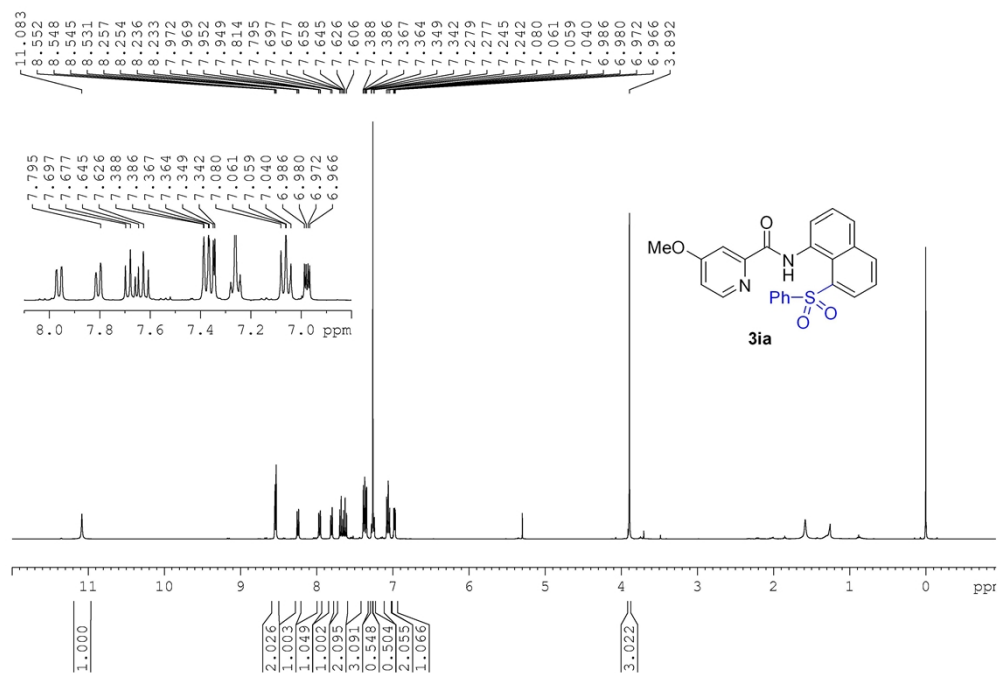

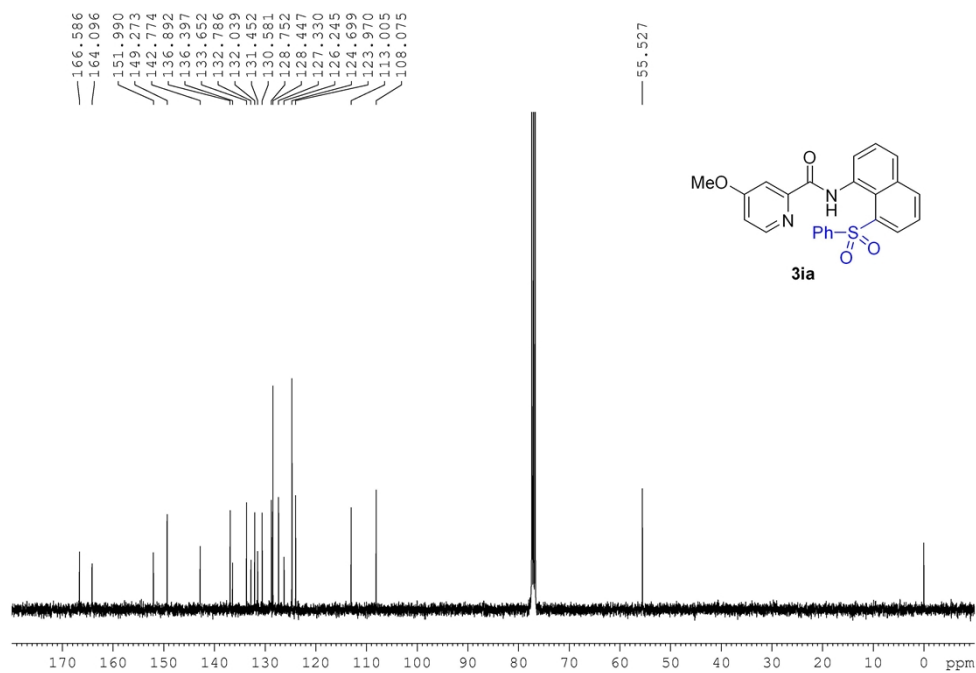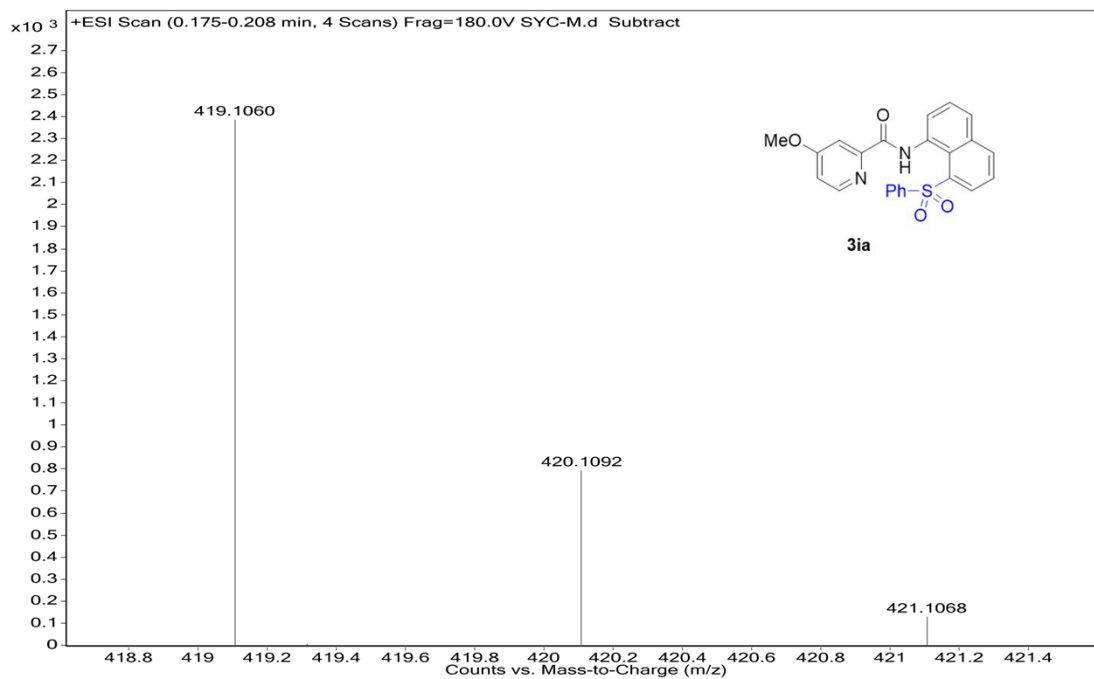

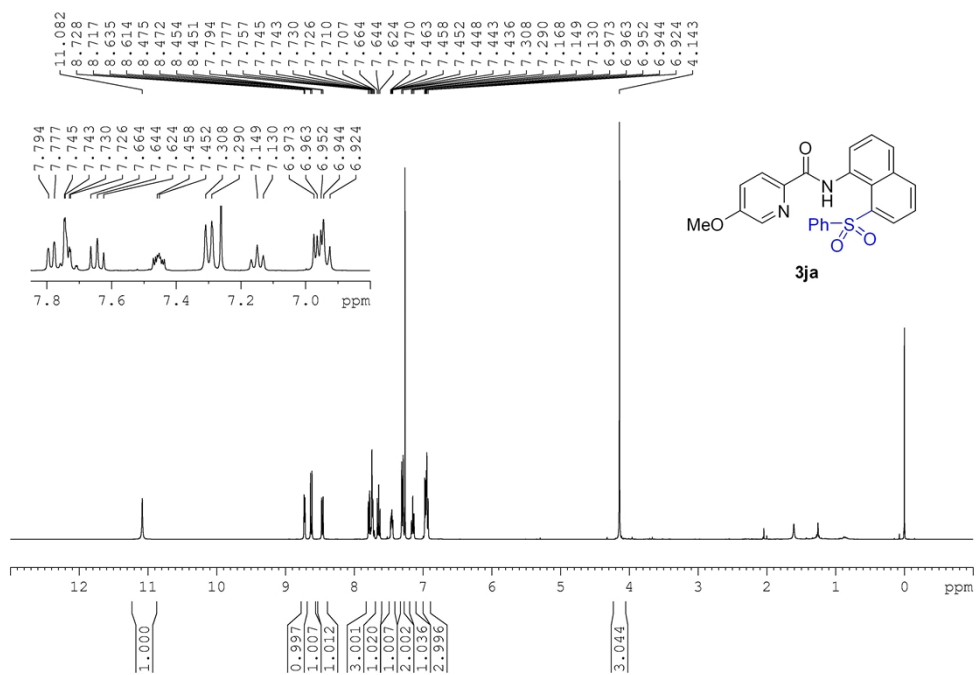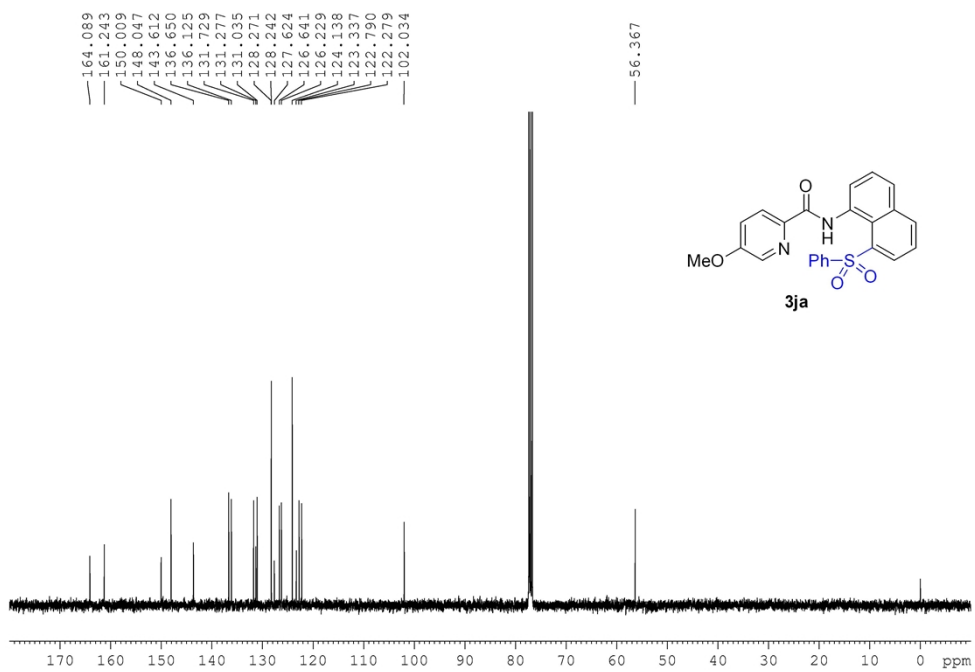

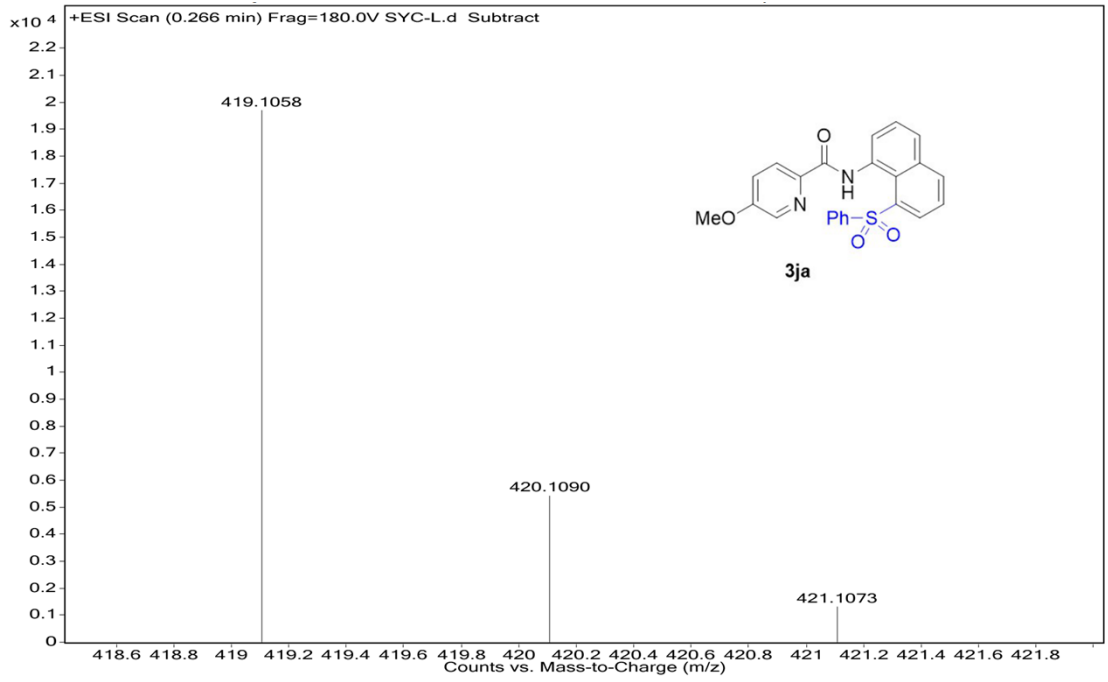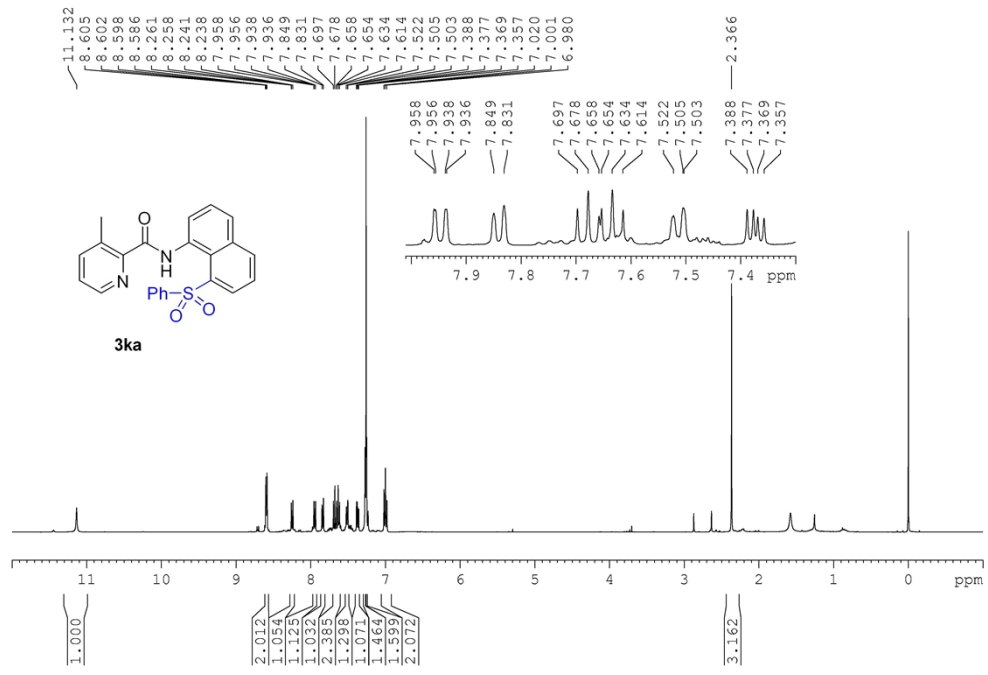



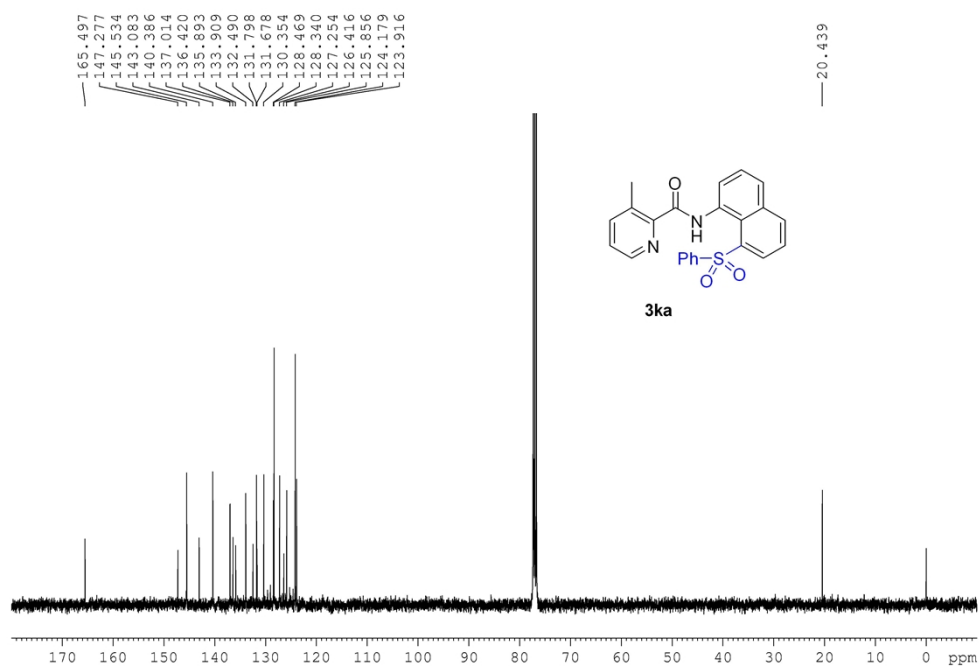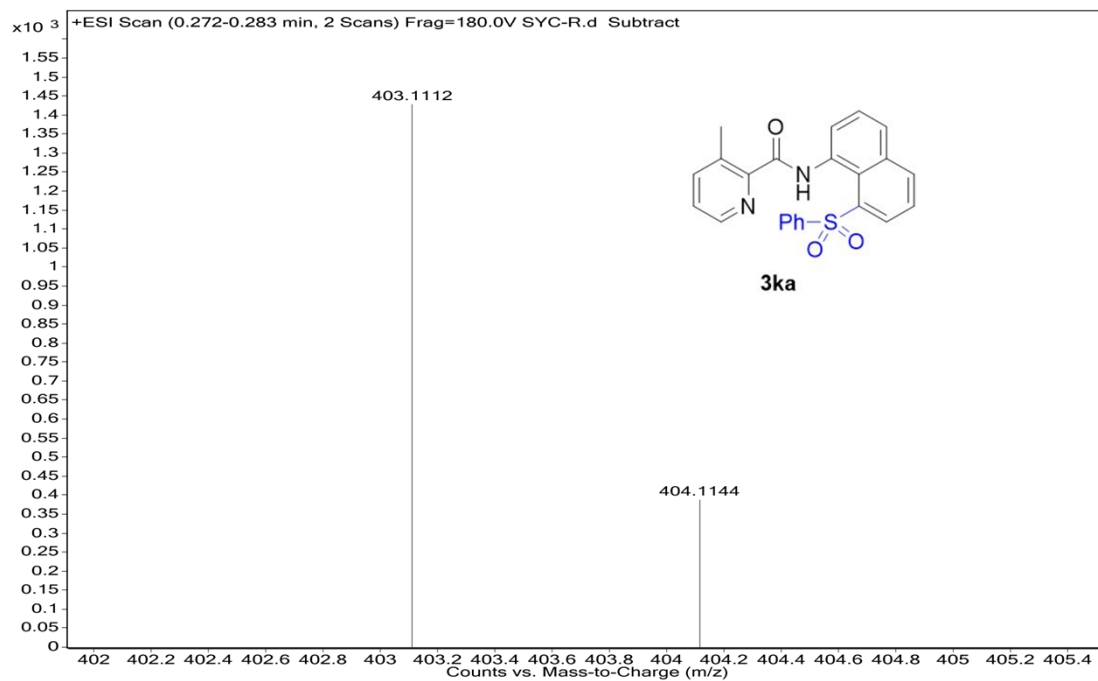



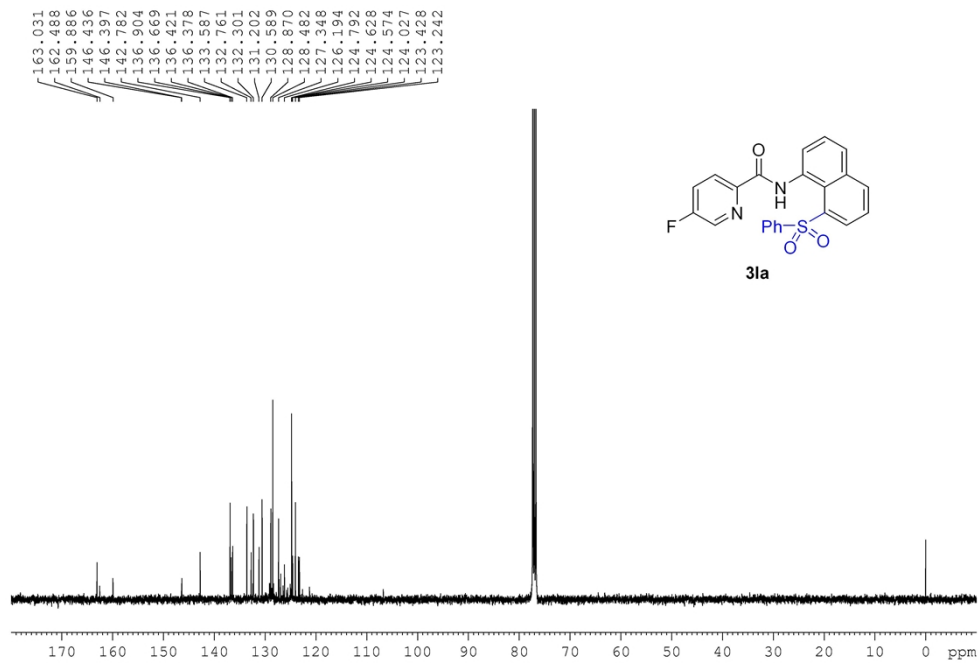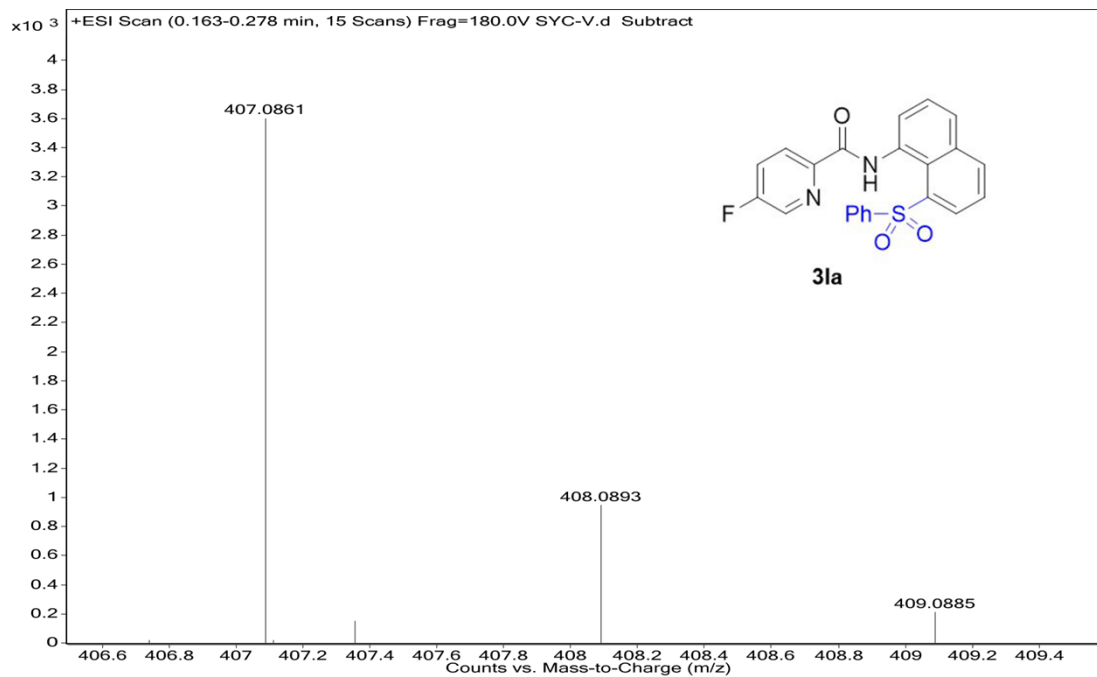

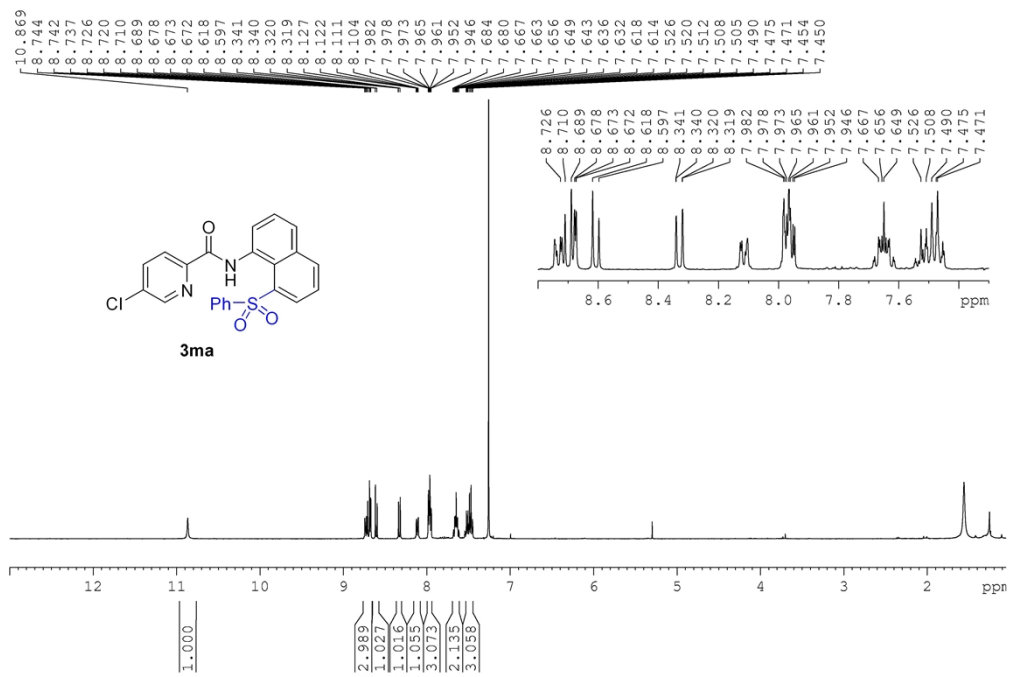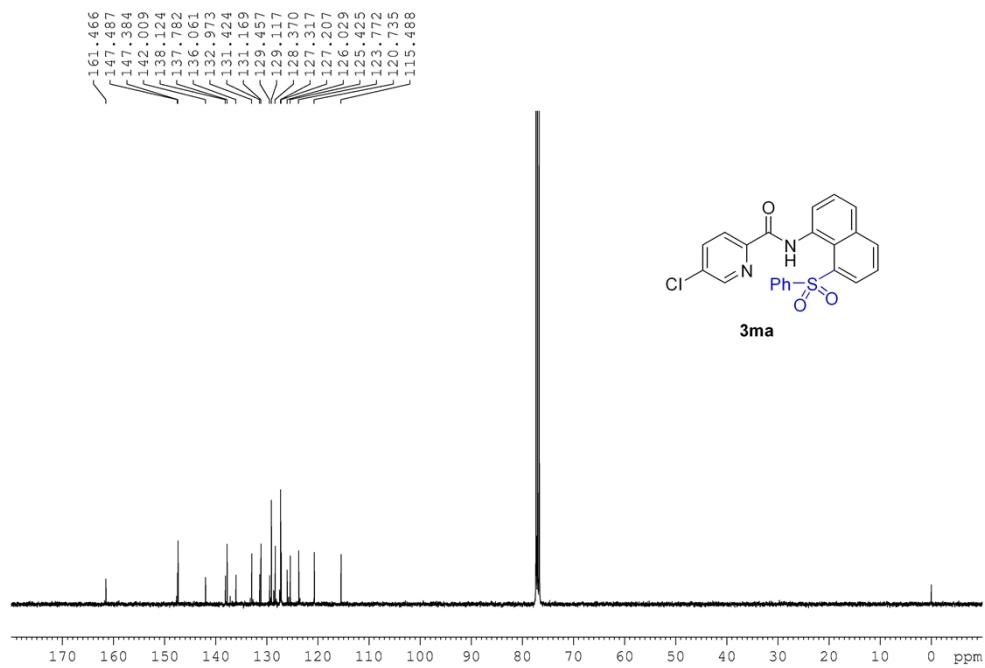

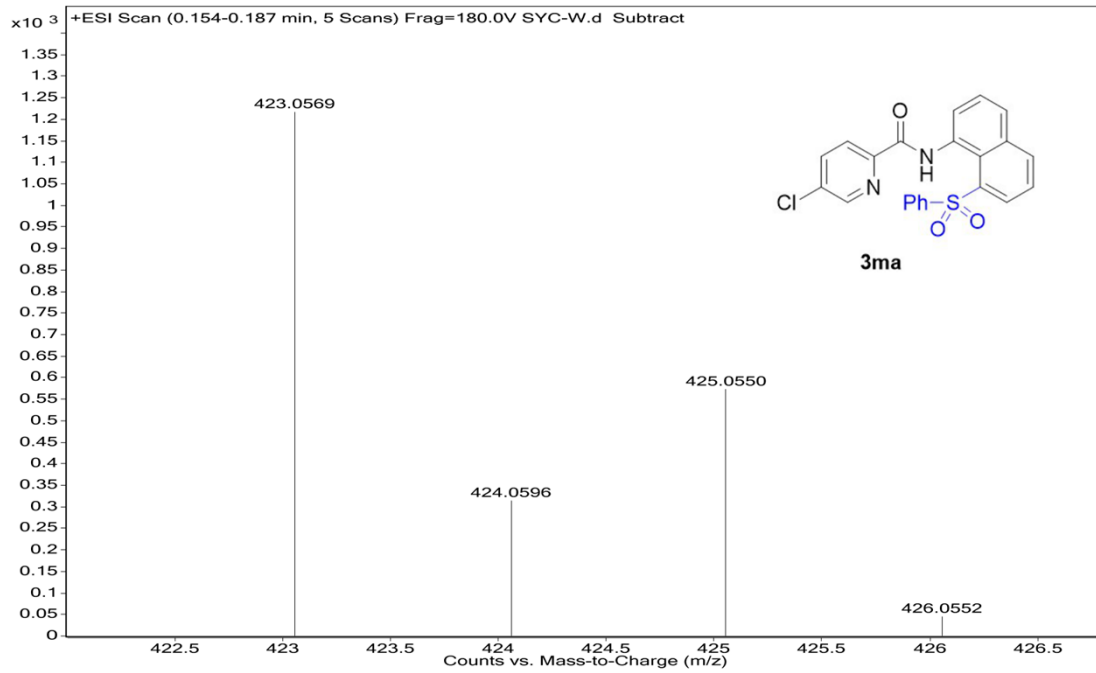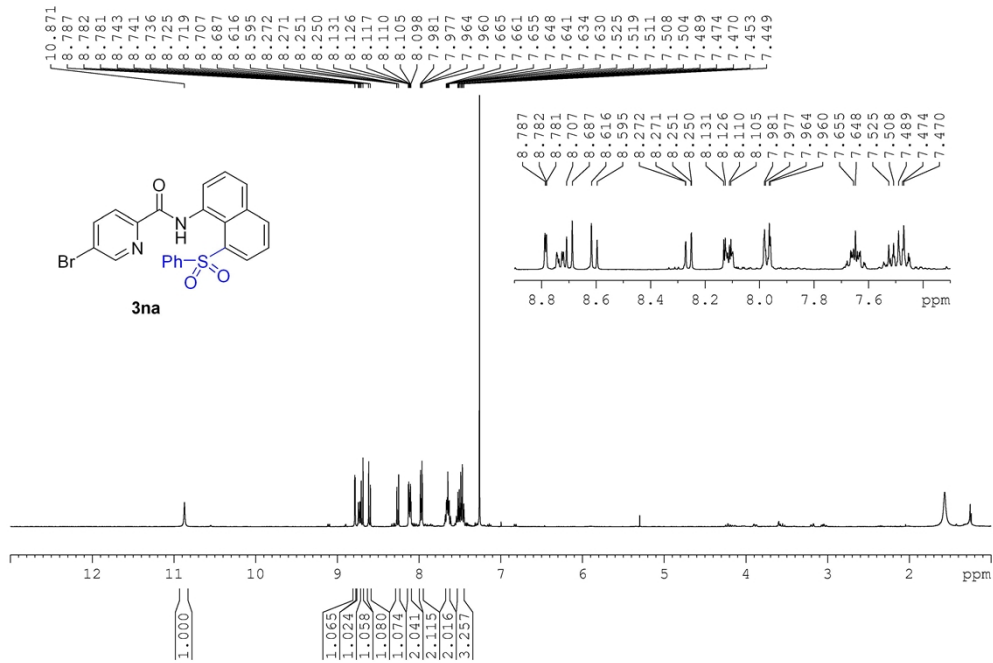

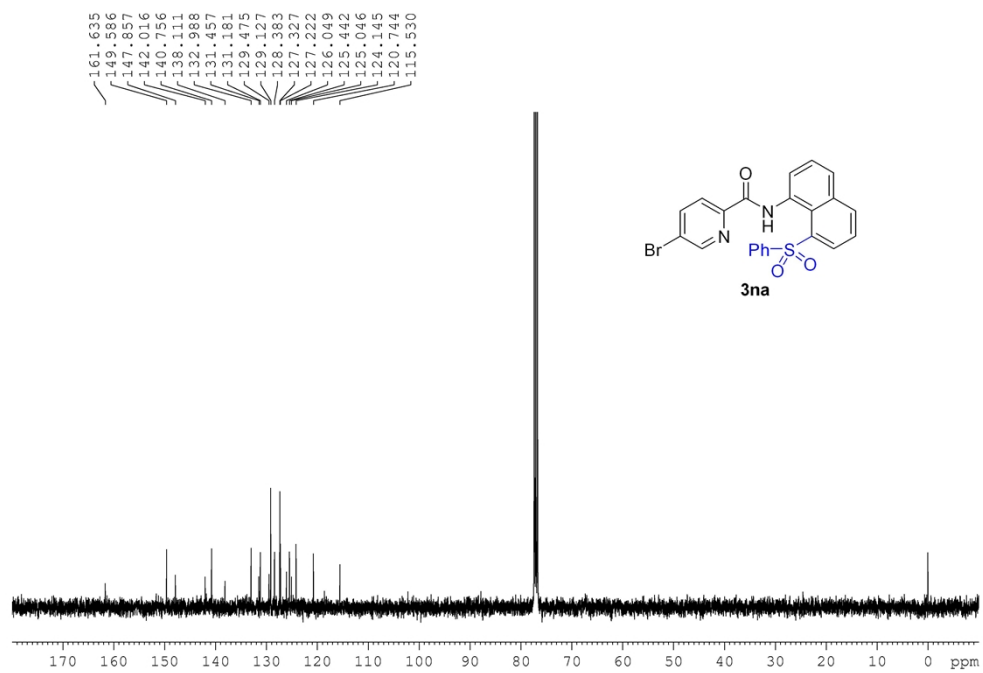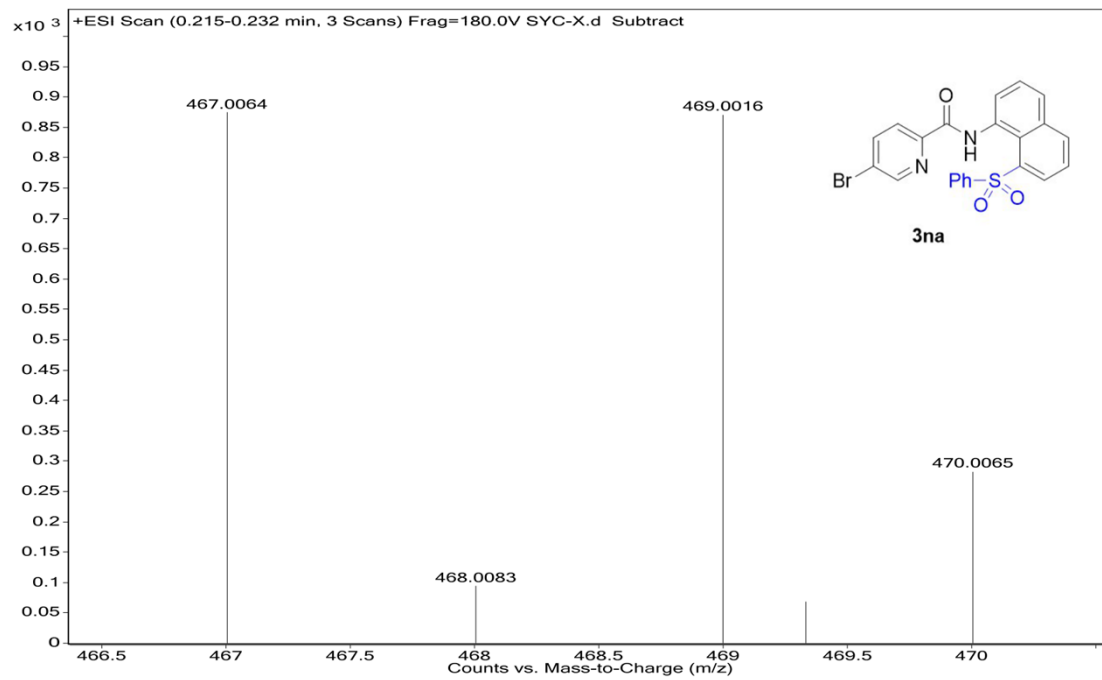

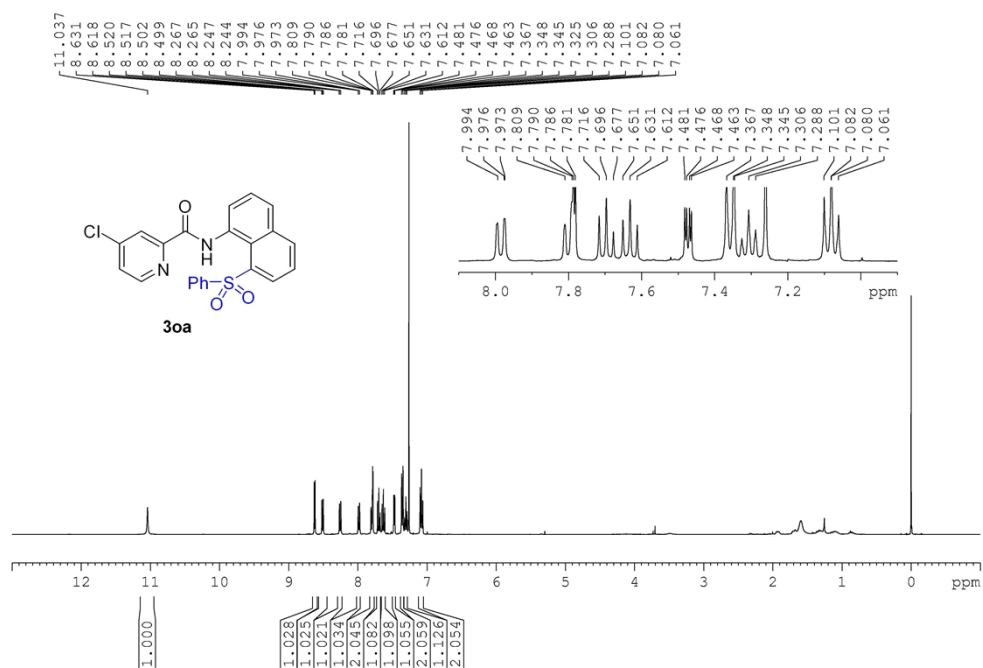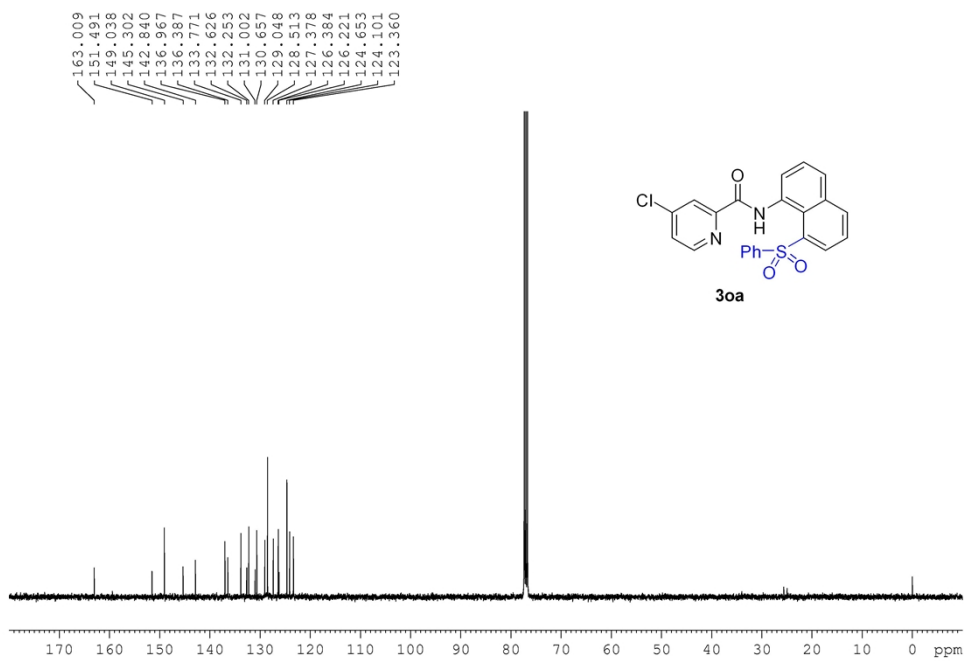

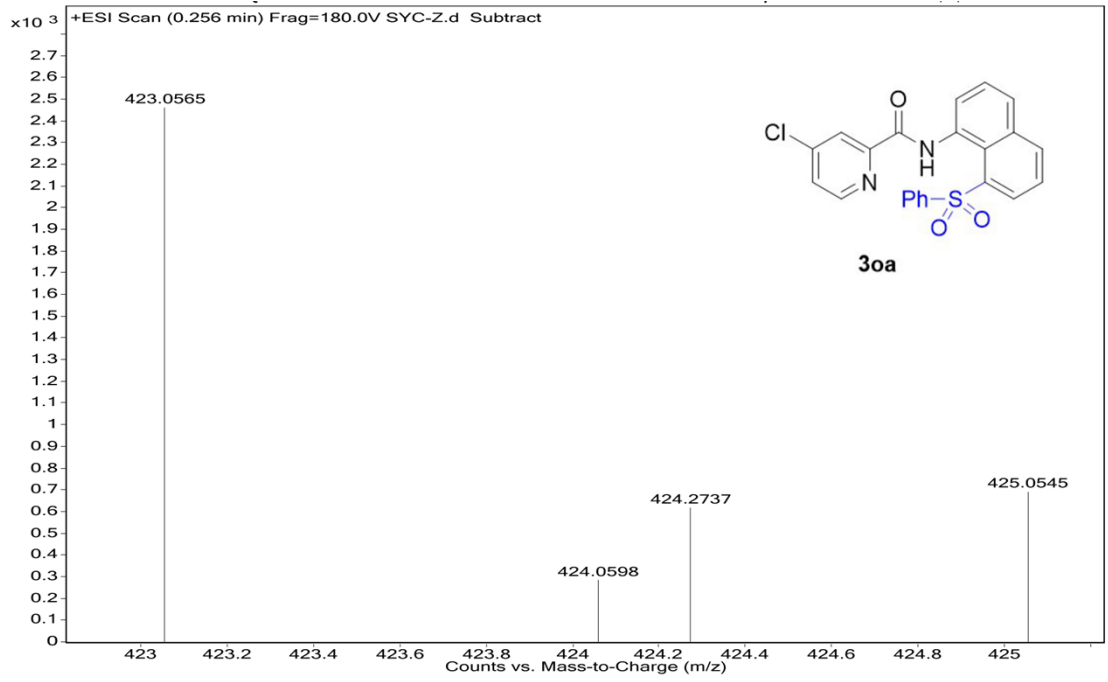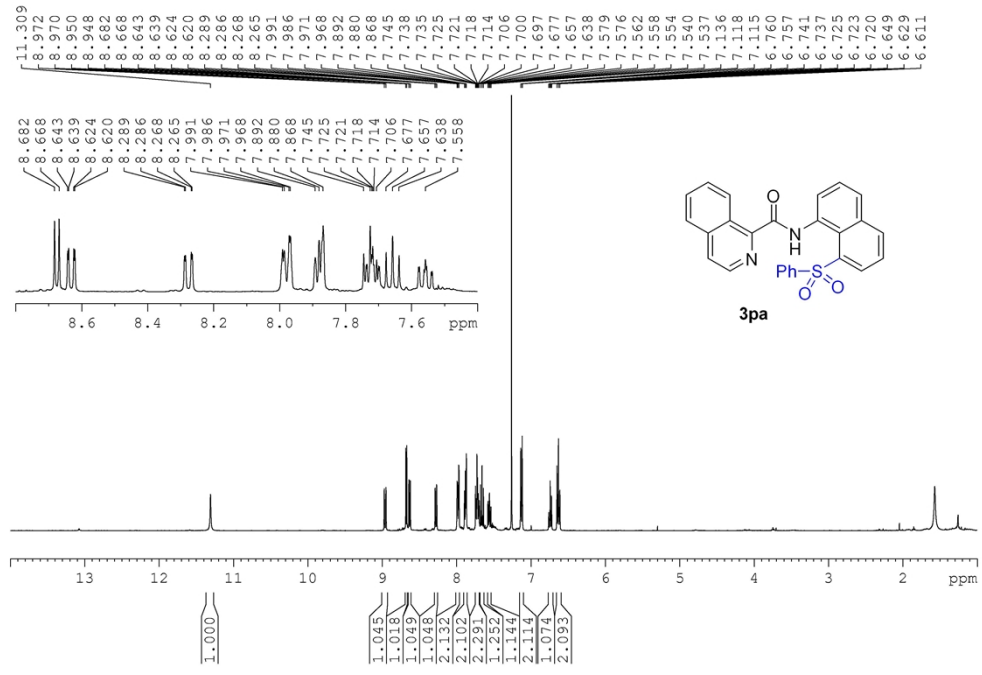



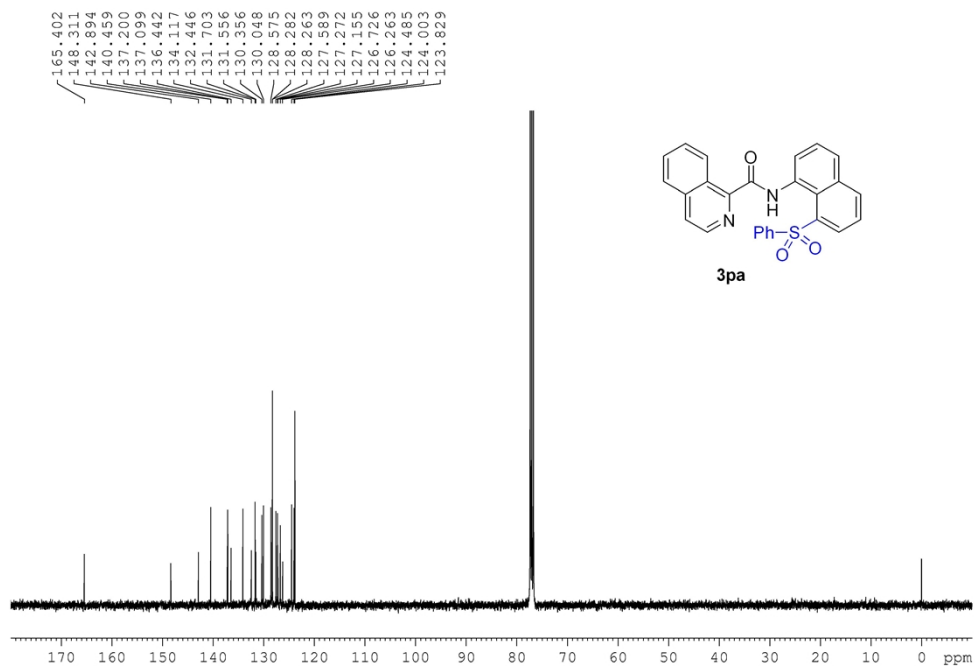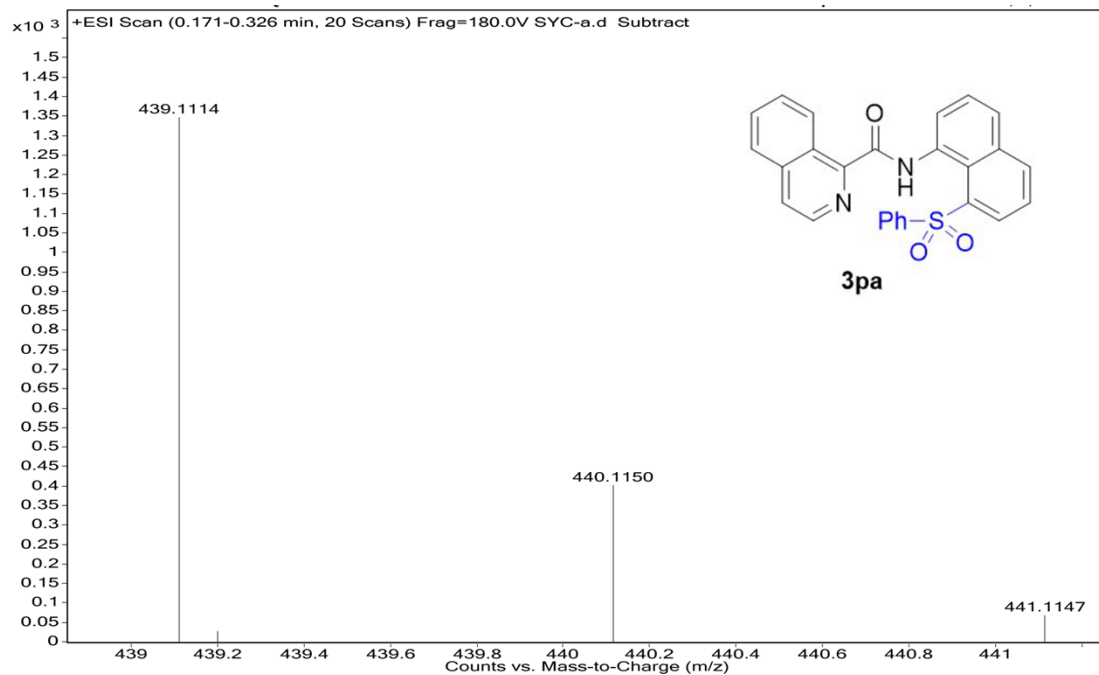

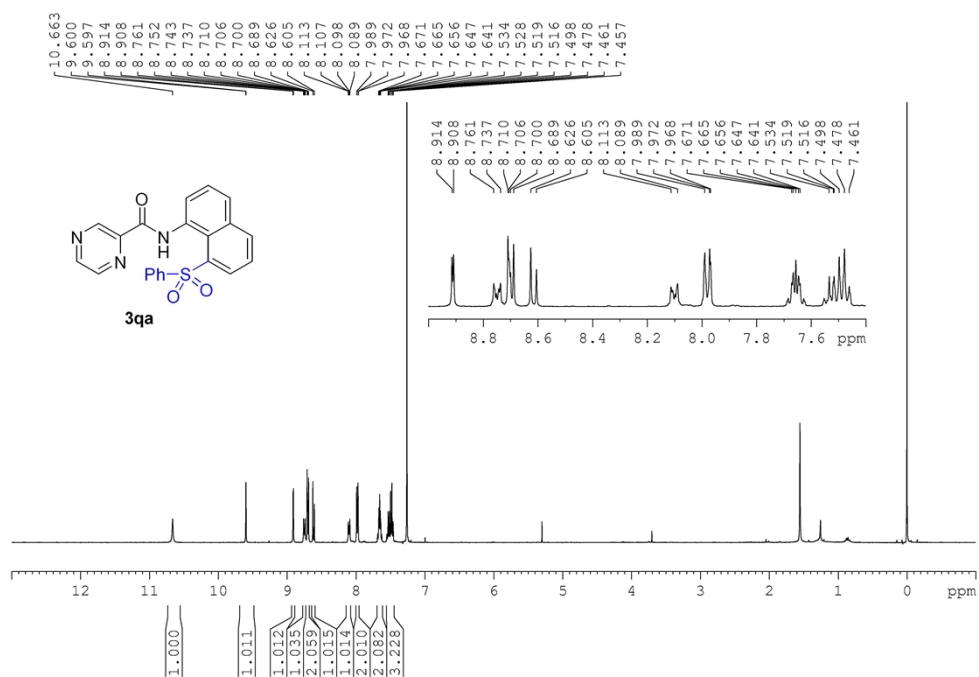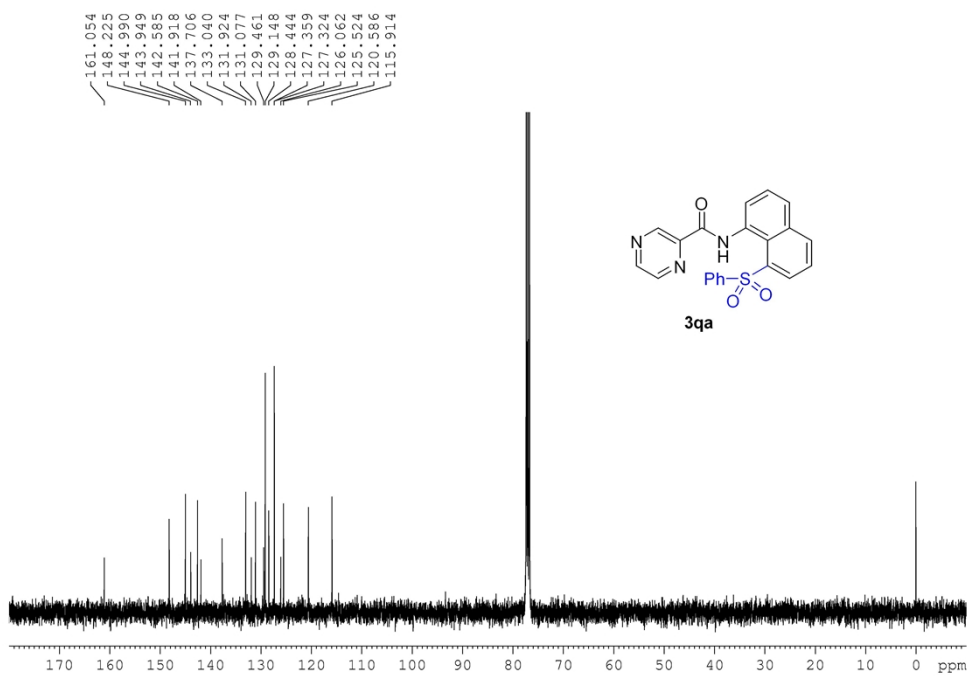

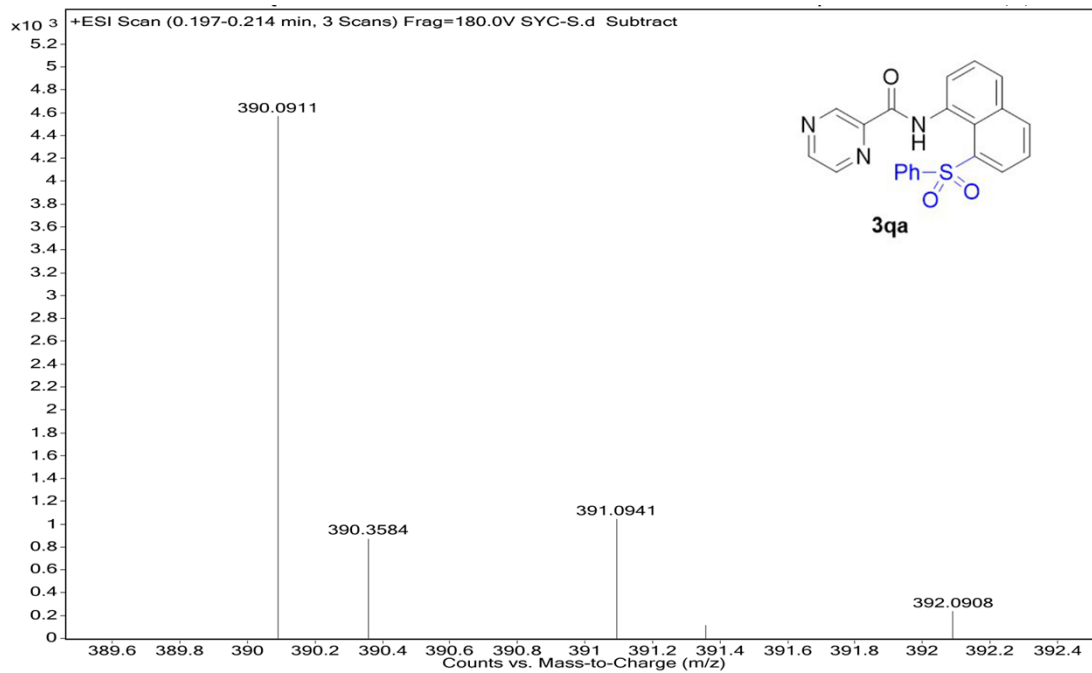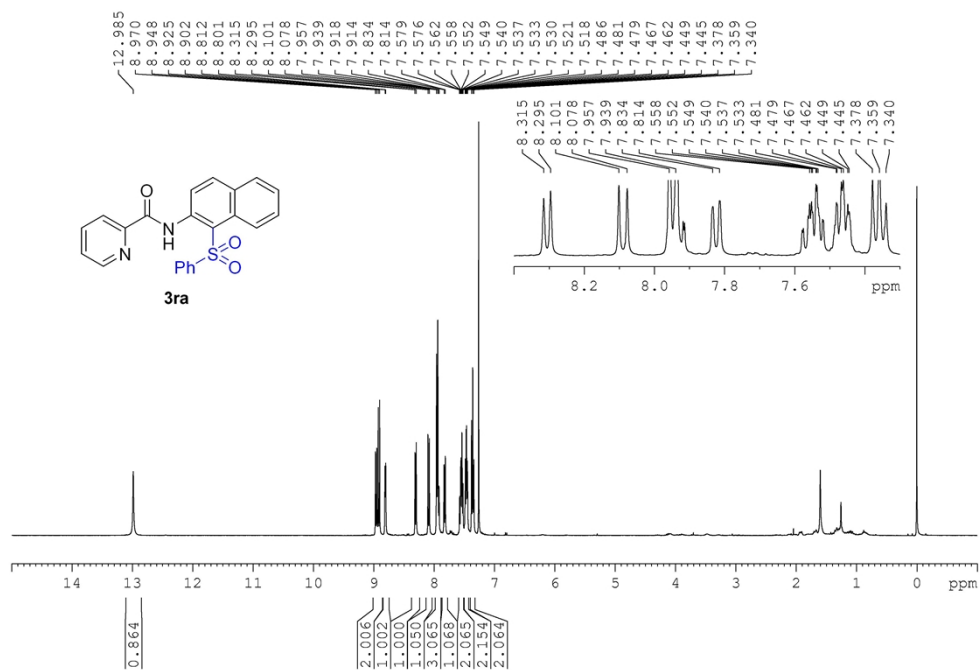

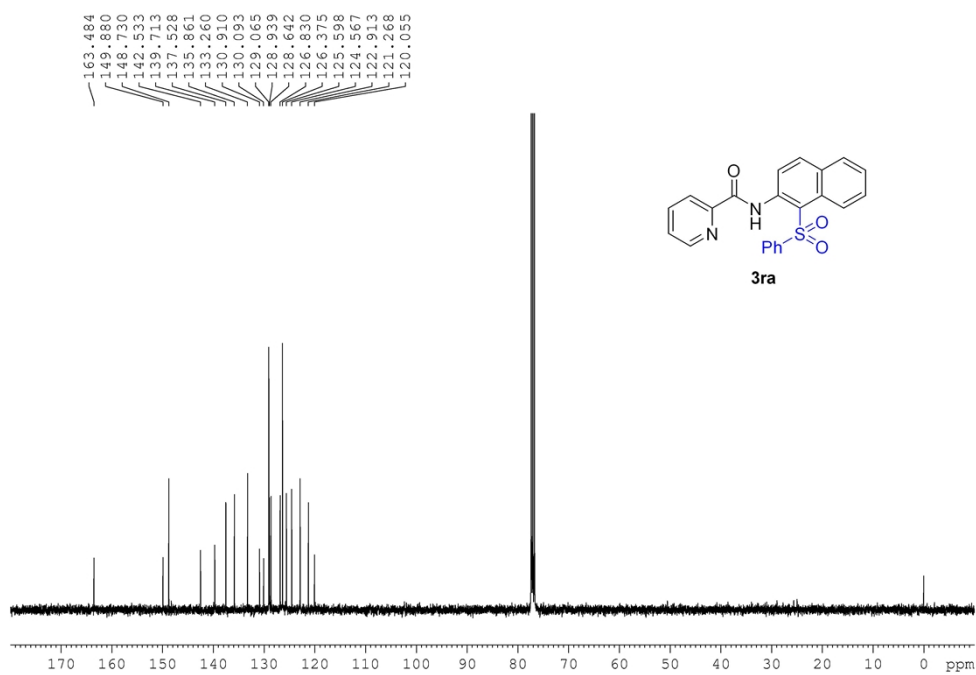

2021-WYJ-1 15 (0.278) AM (Cen,2, 80.00, Ht,5000.0,0.00,1.00); Sm (Mn, 2x3.00); Cm (2:15)

TOF MS ES+  
1.37e3

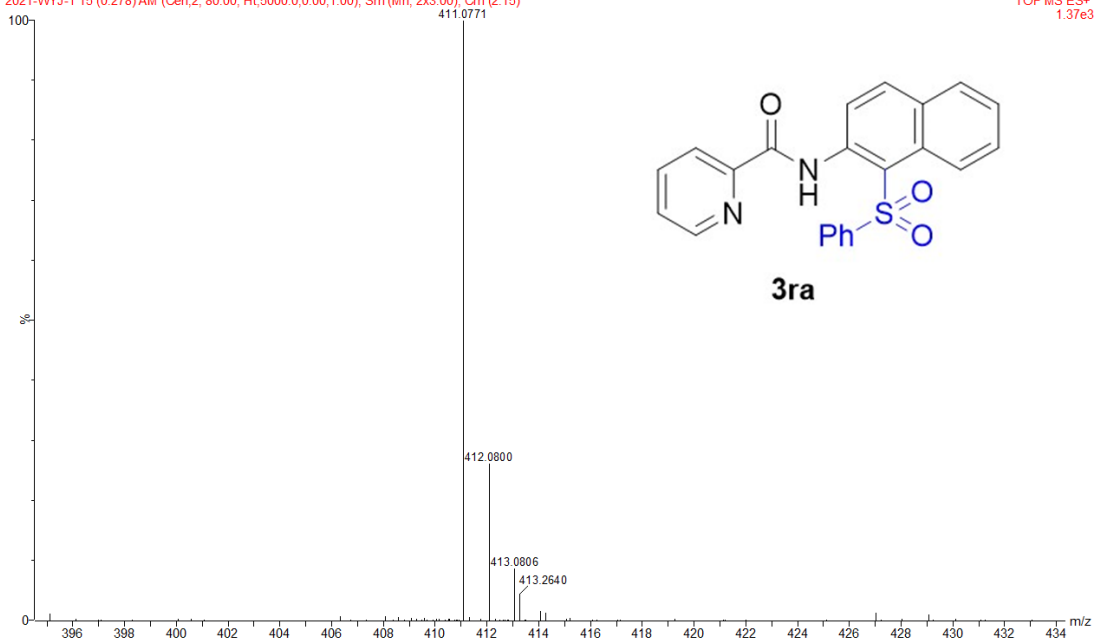

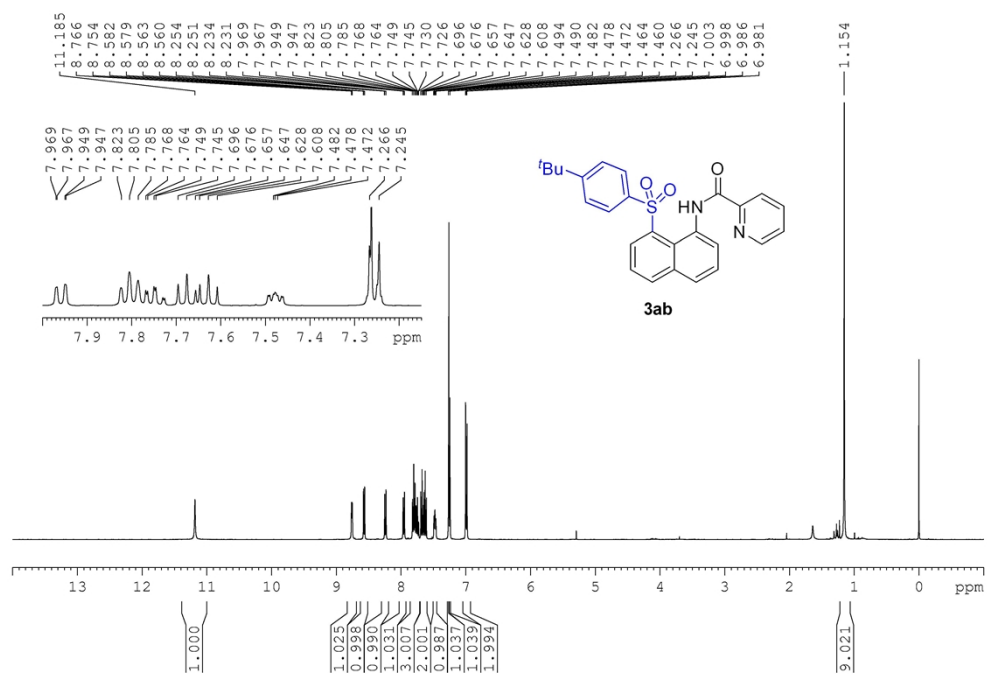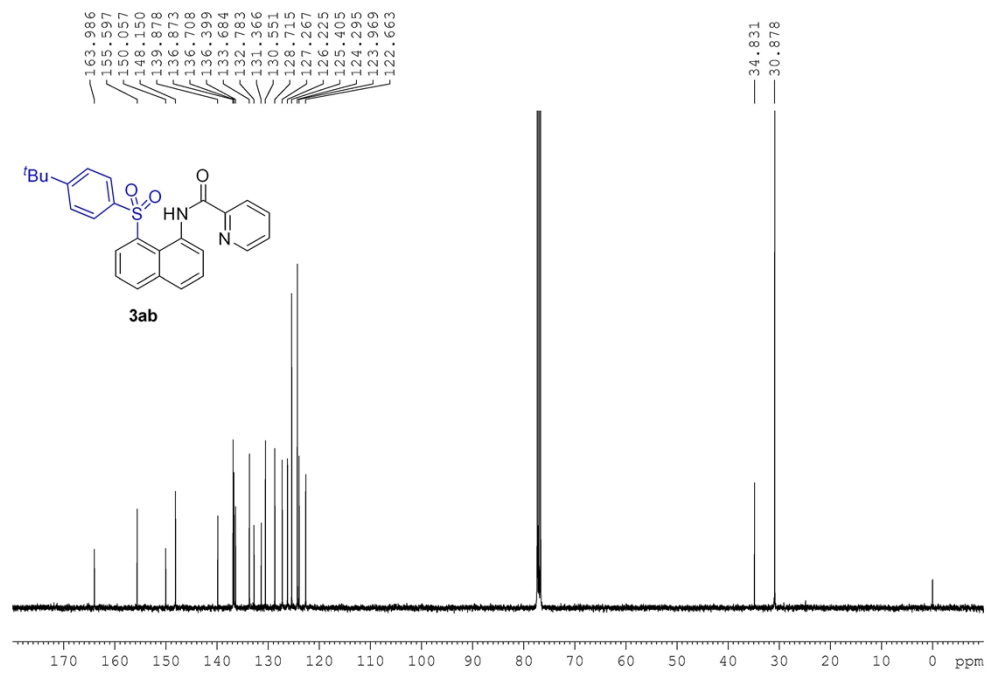

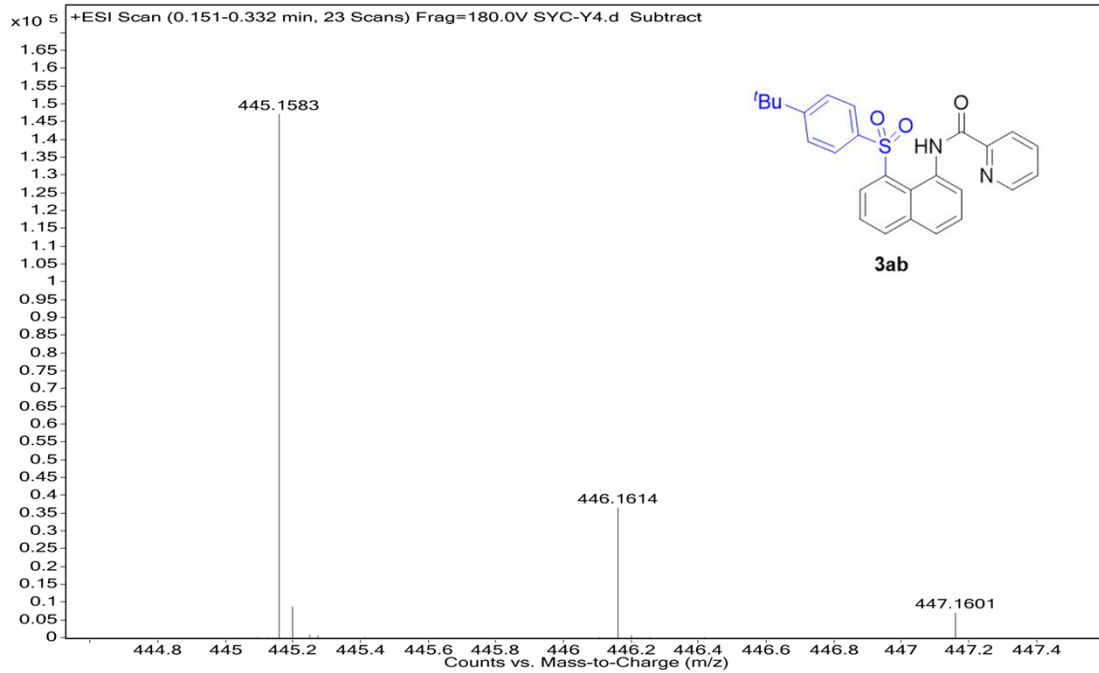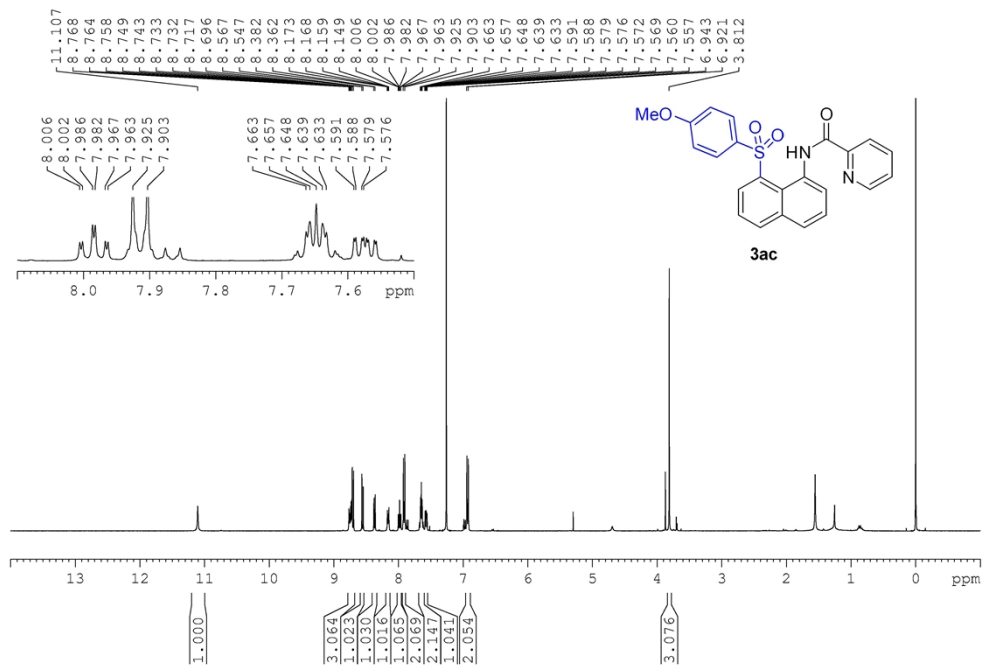

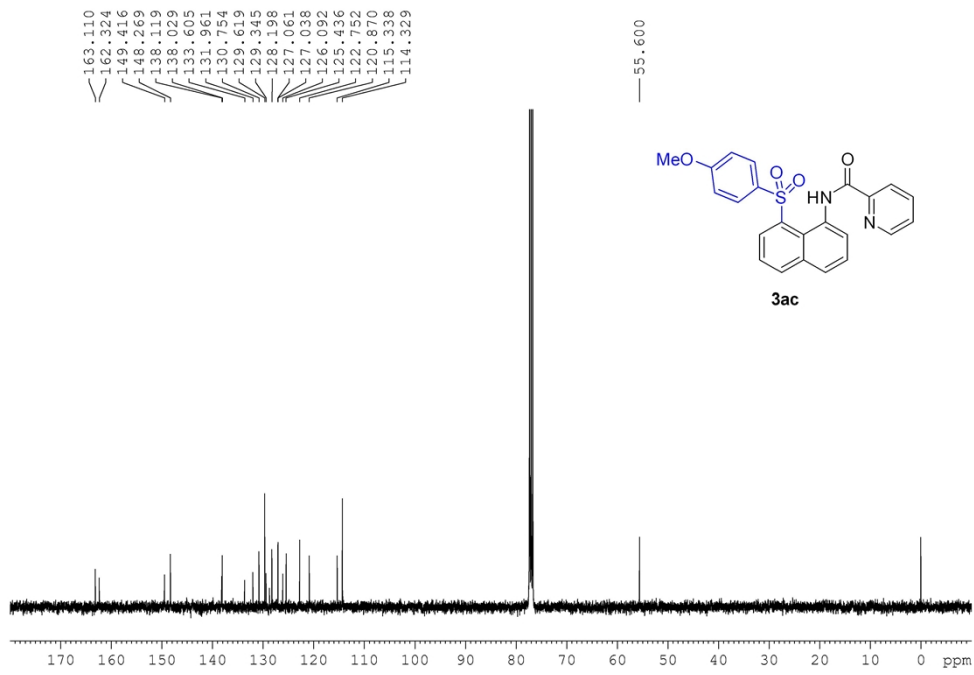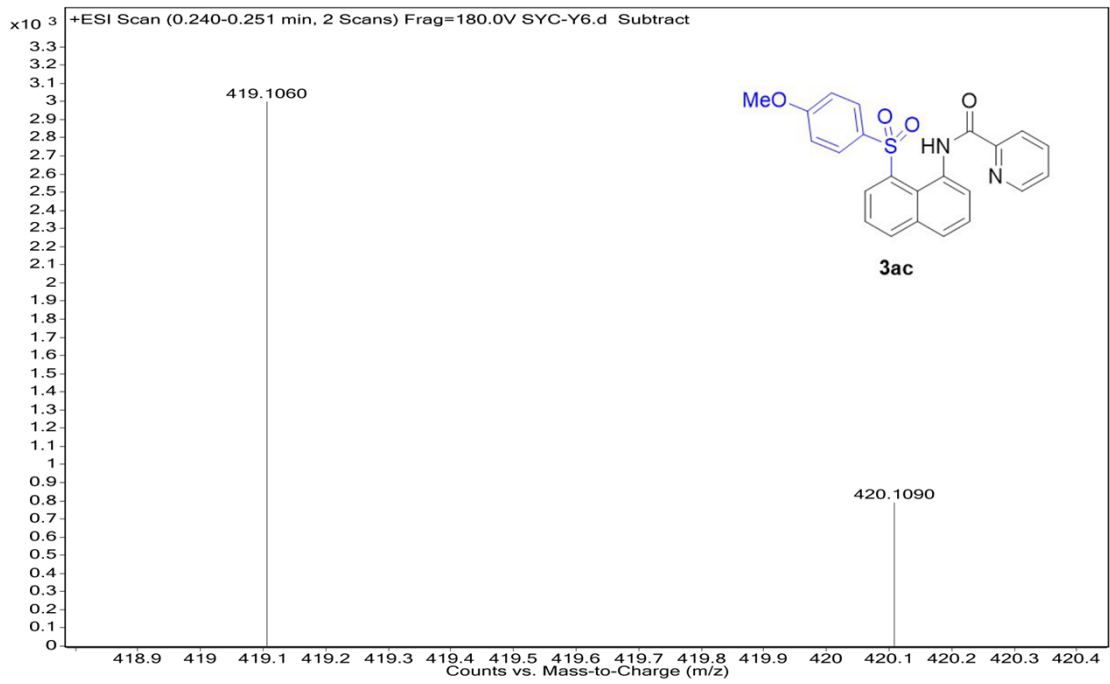

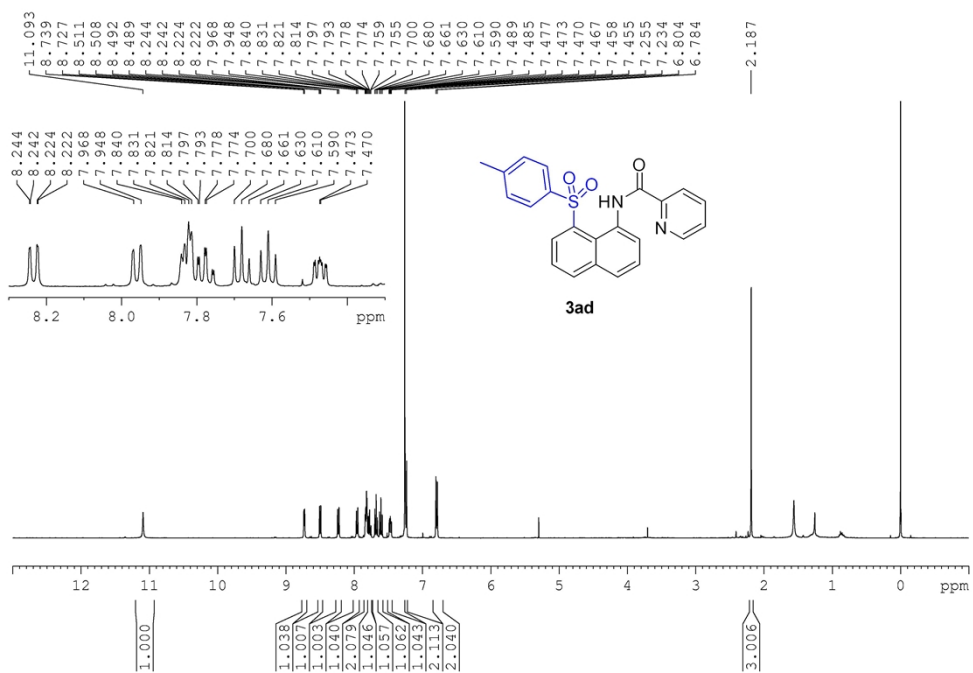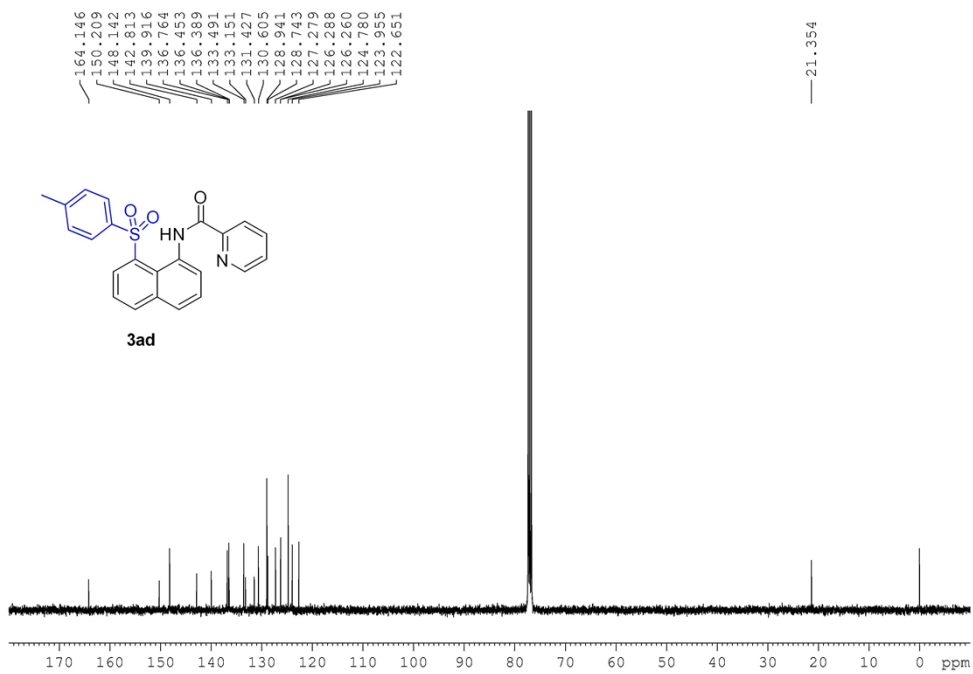



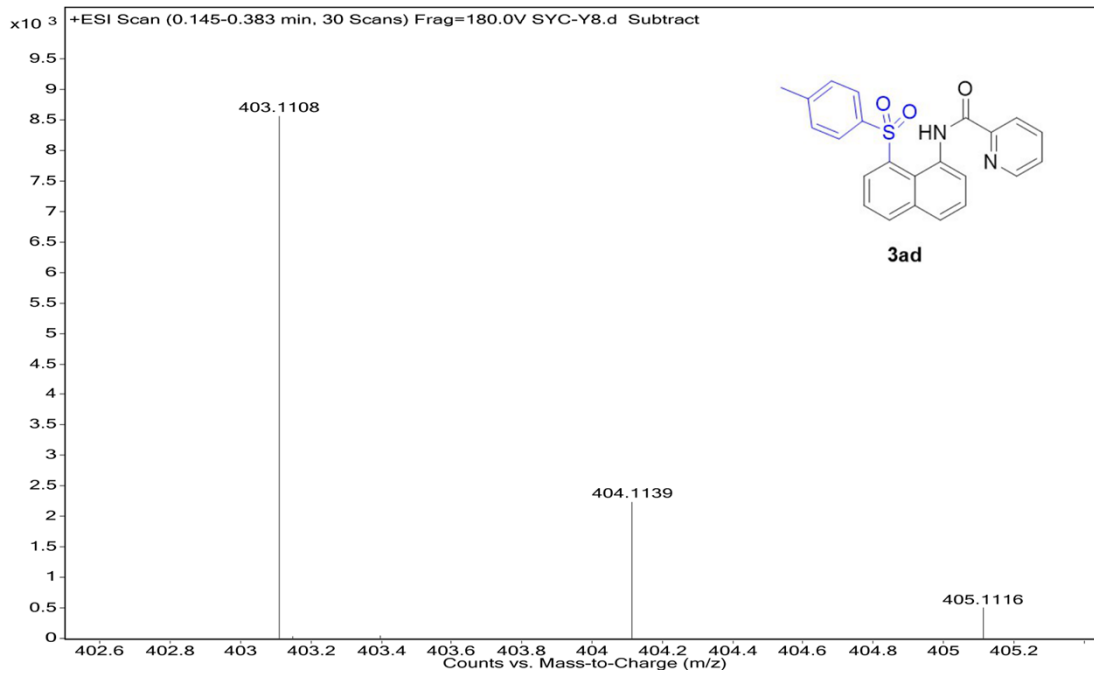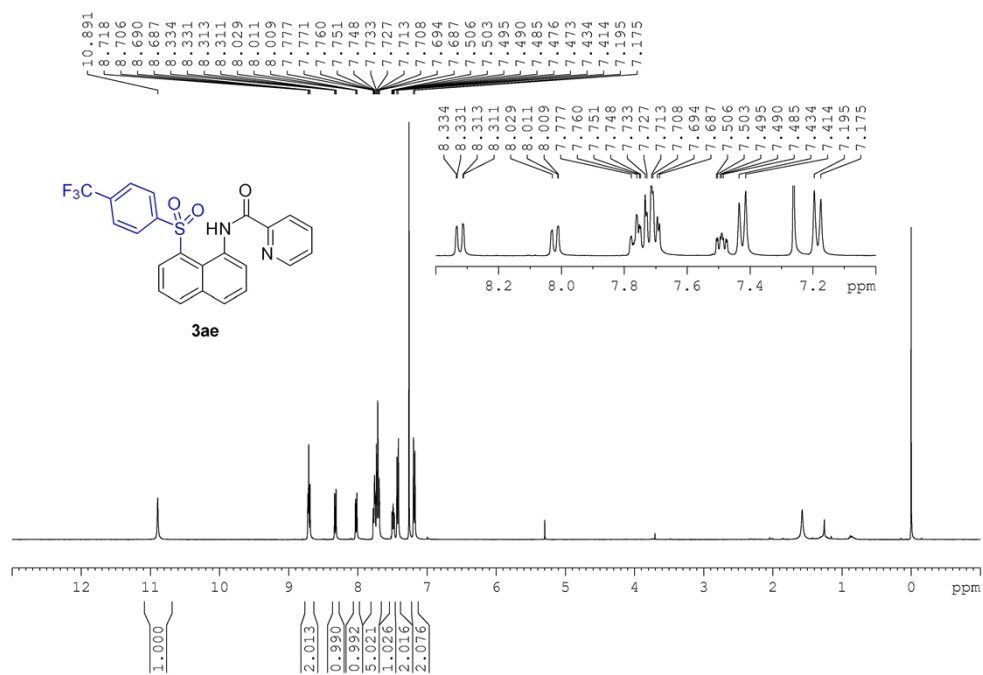

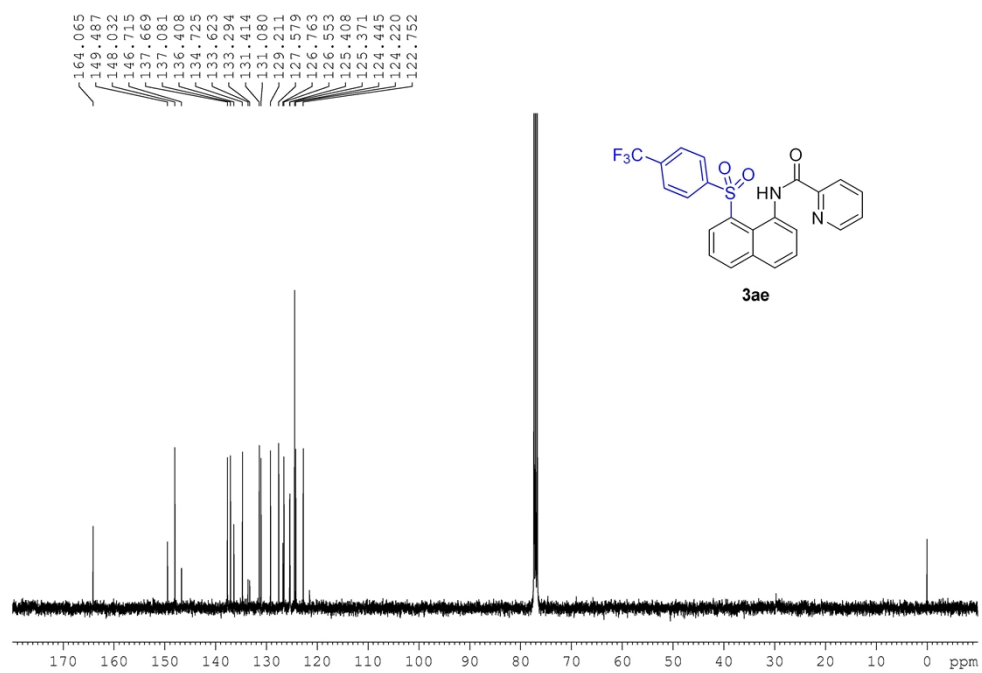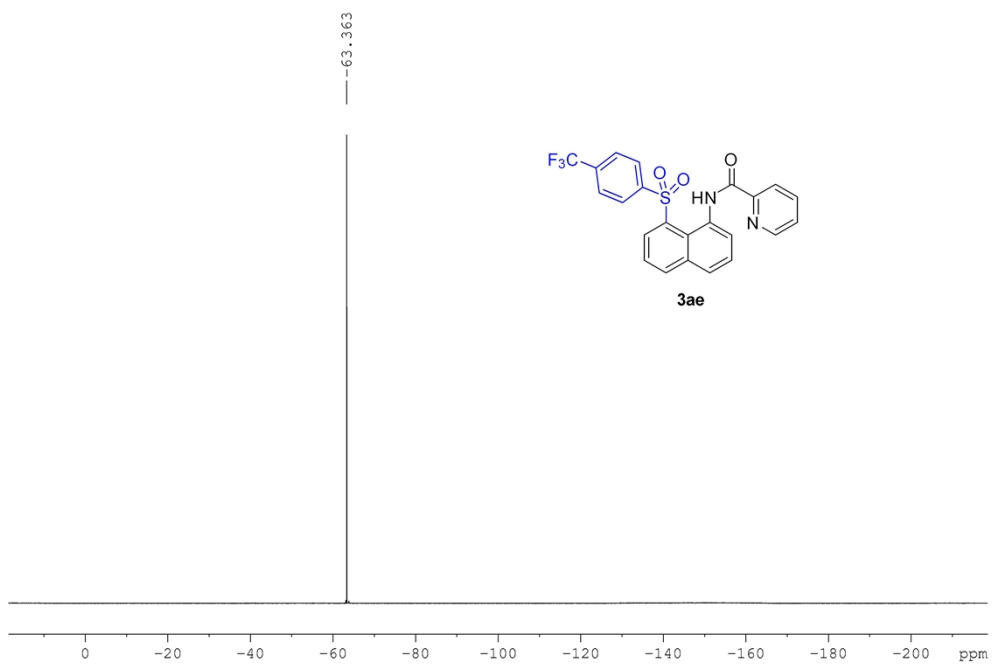

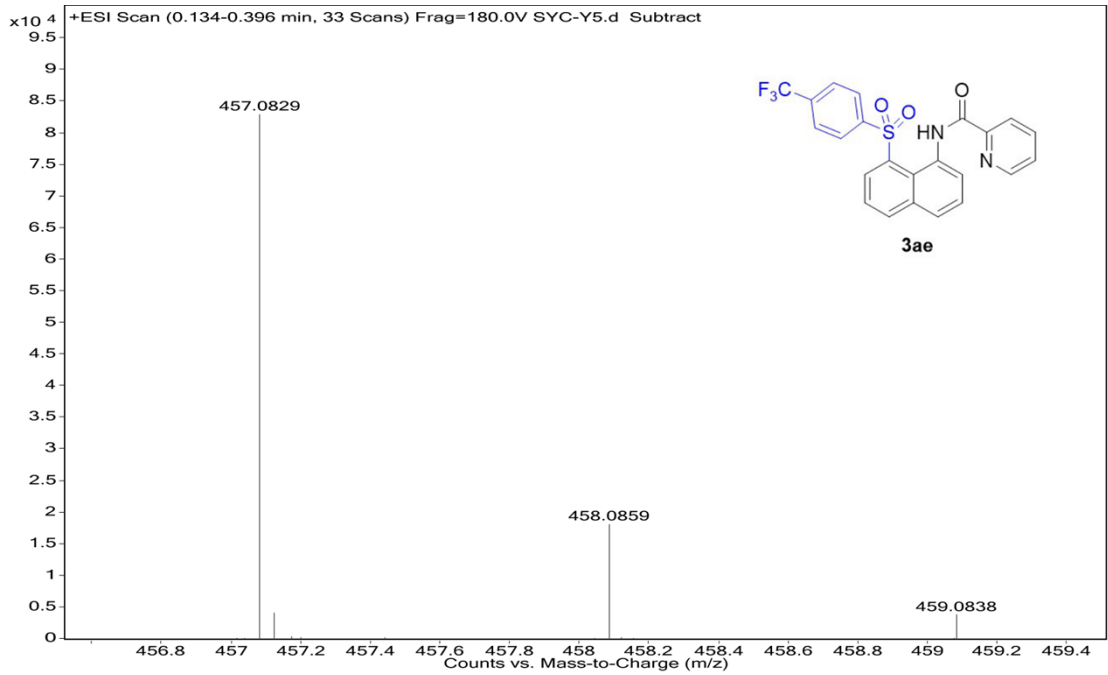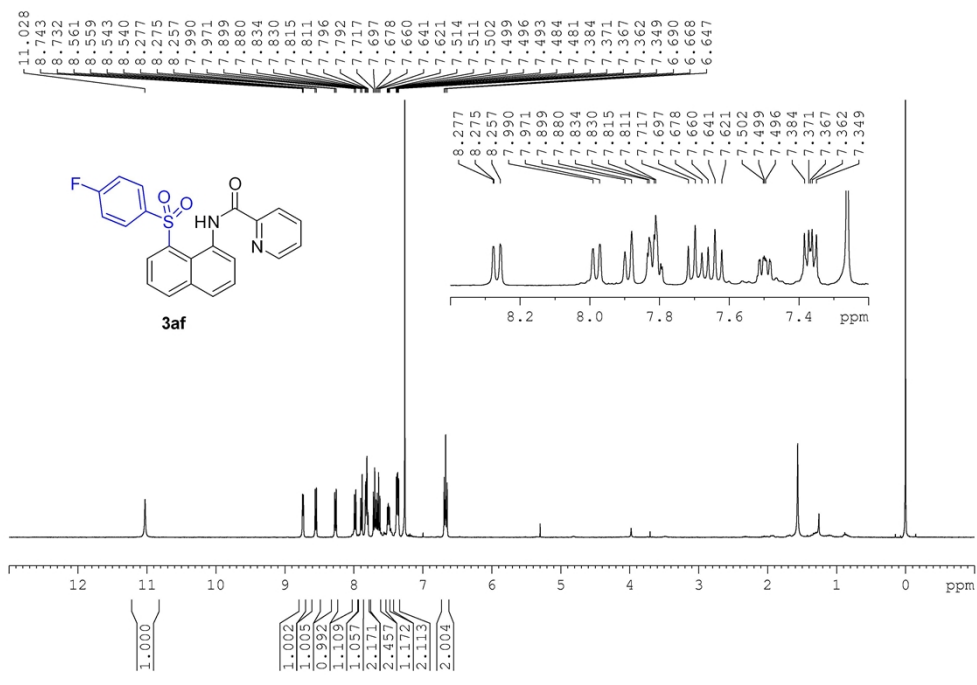

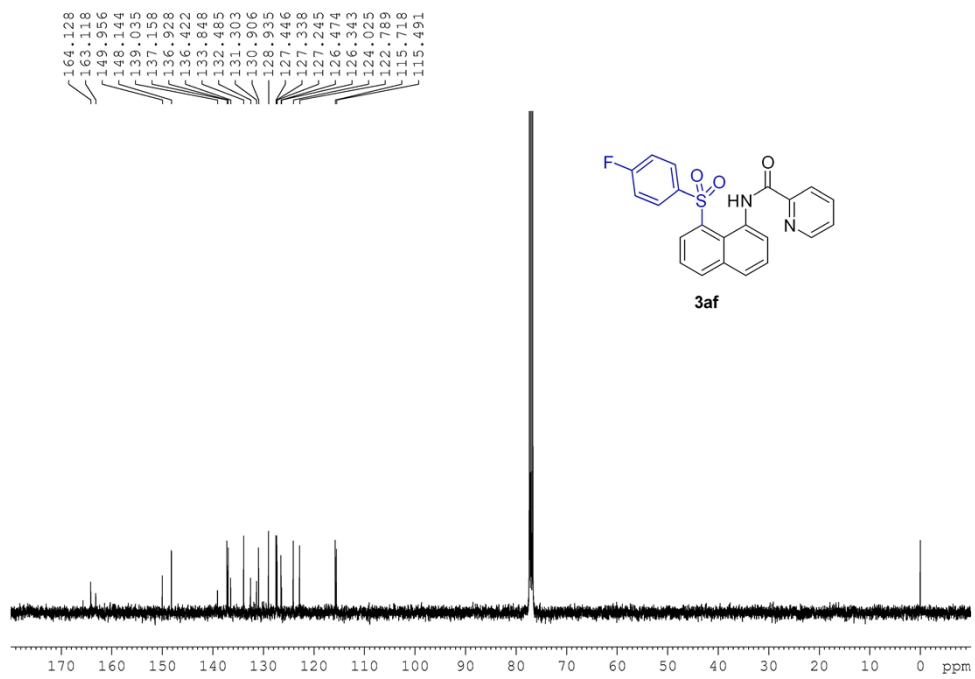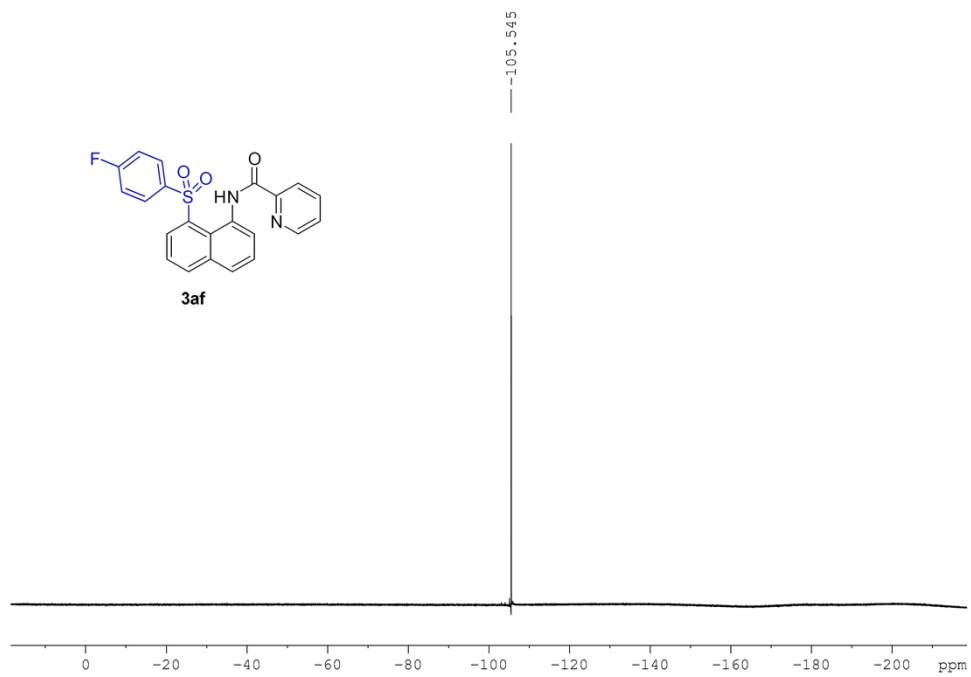

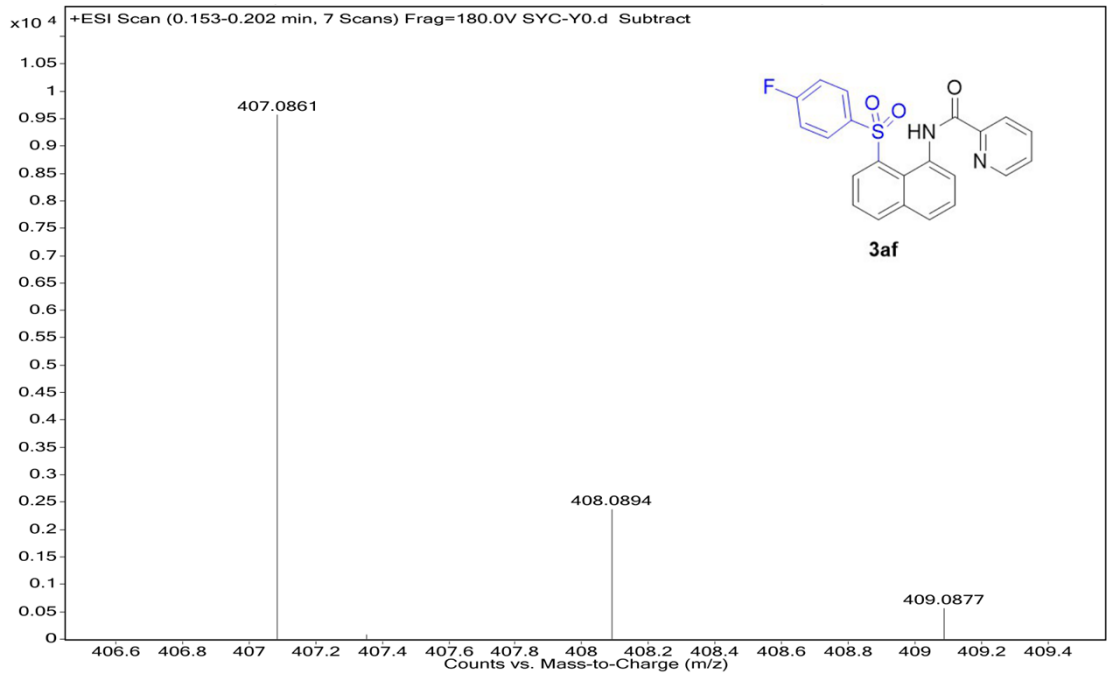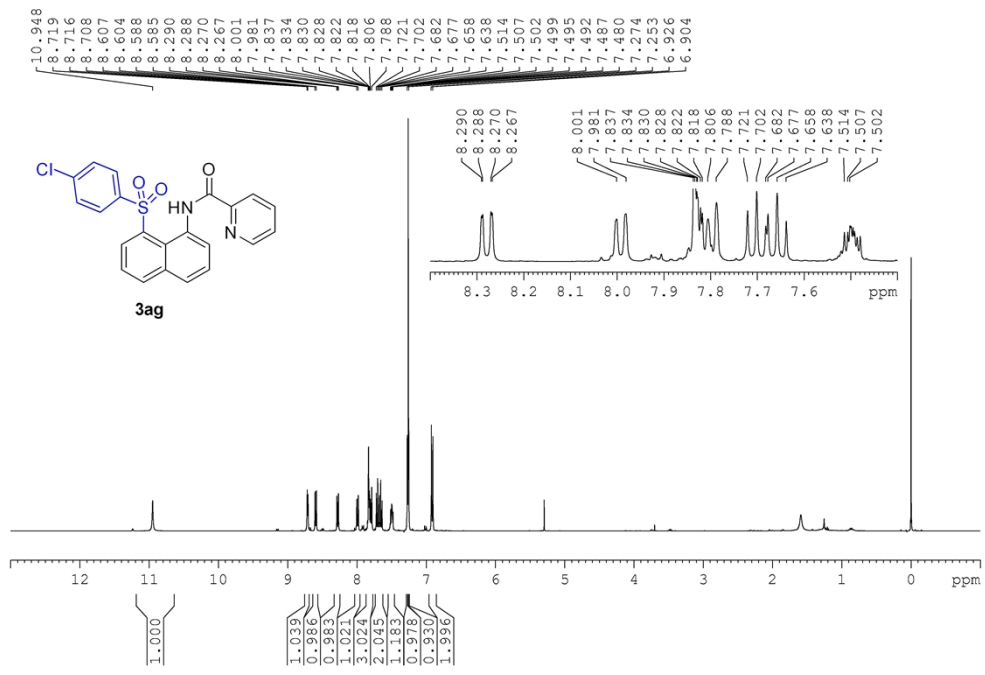

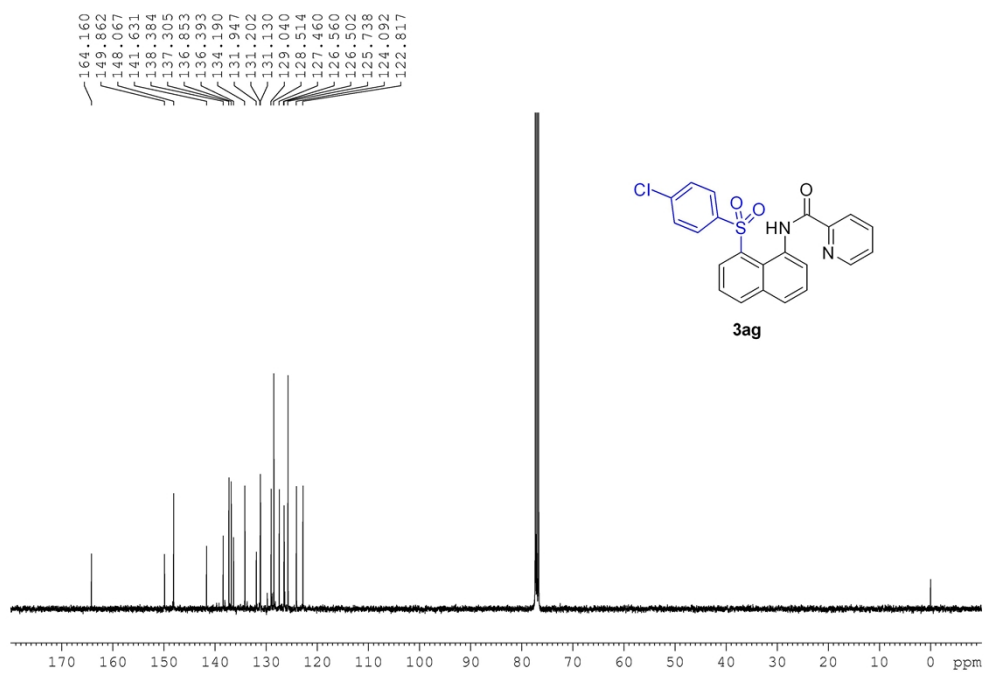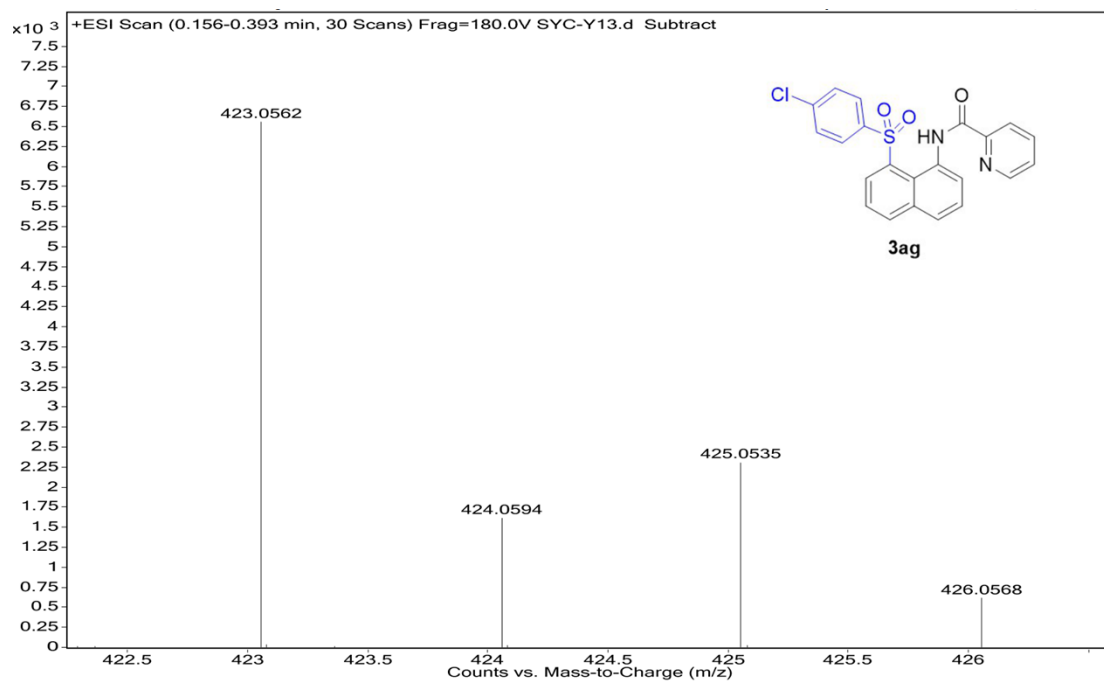

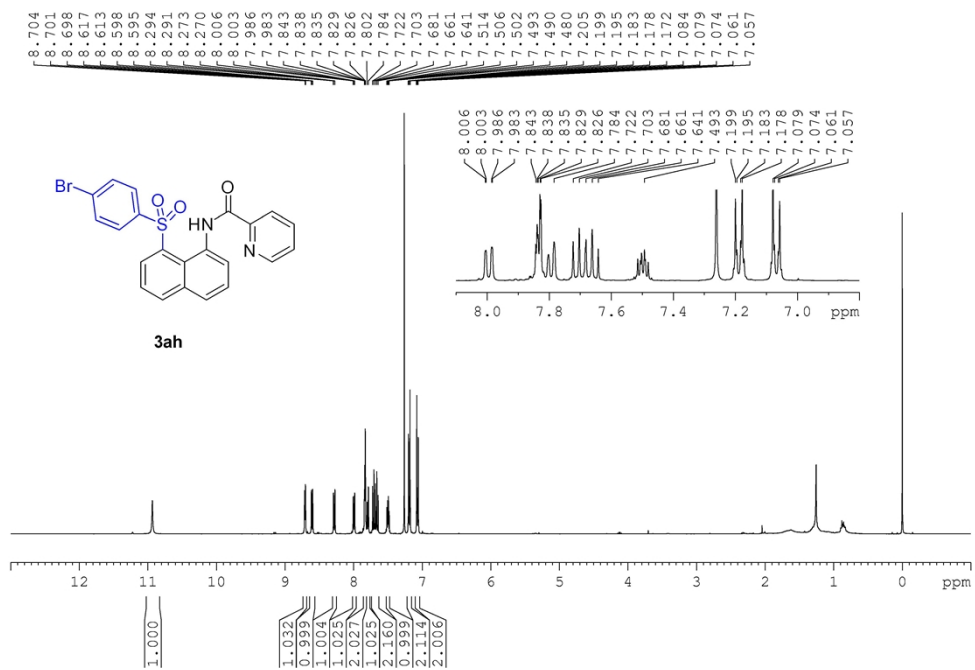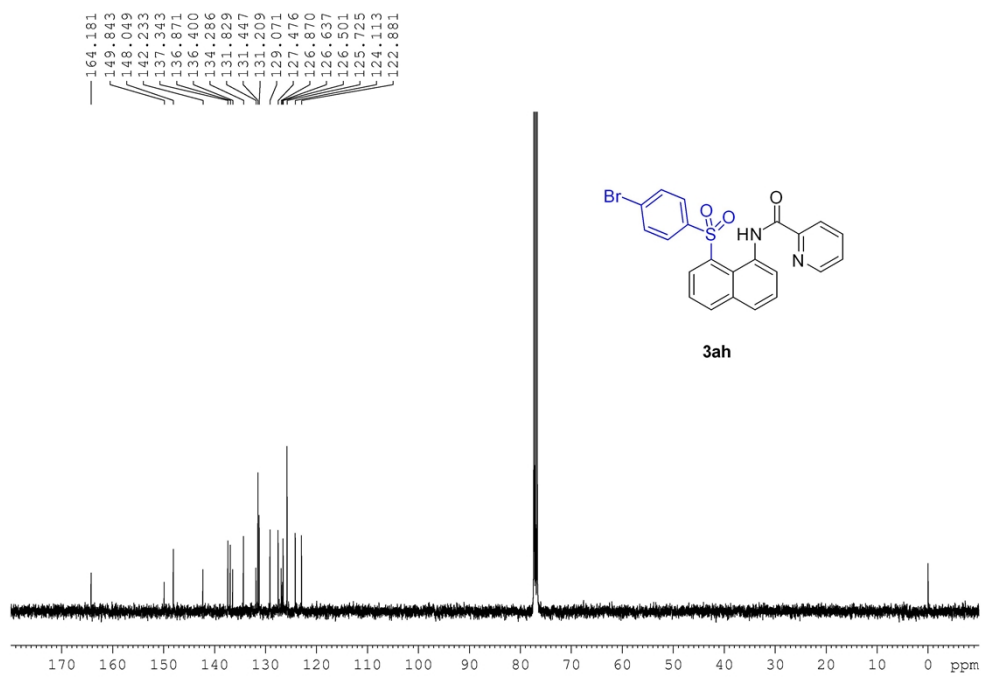

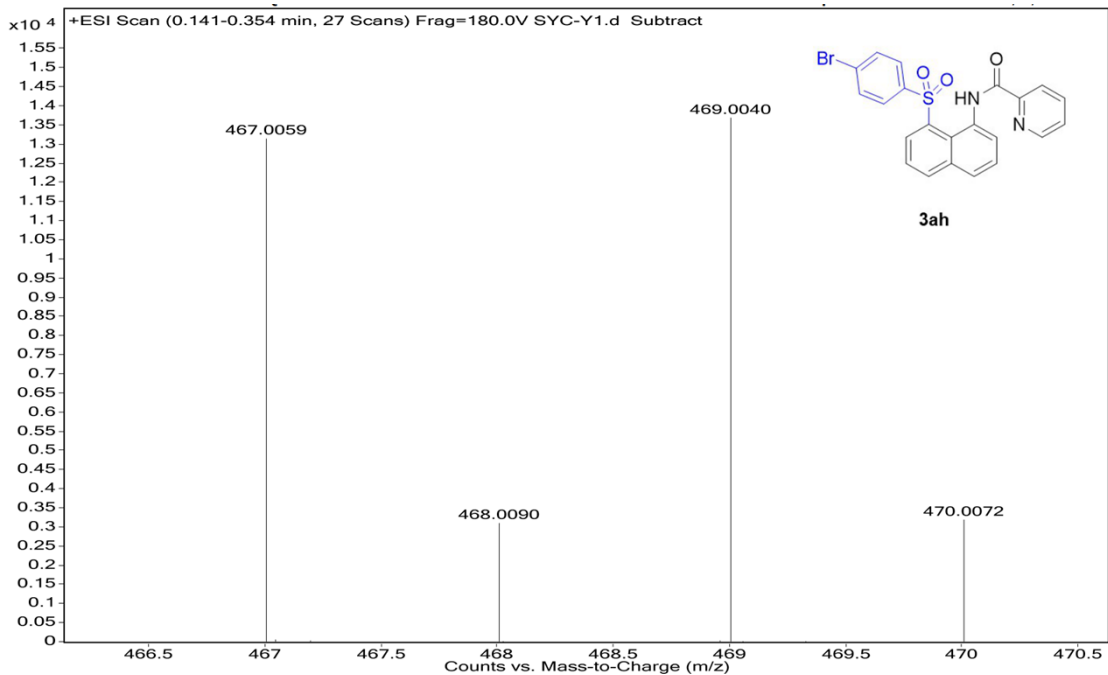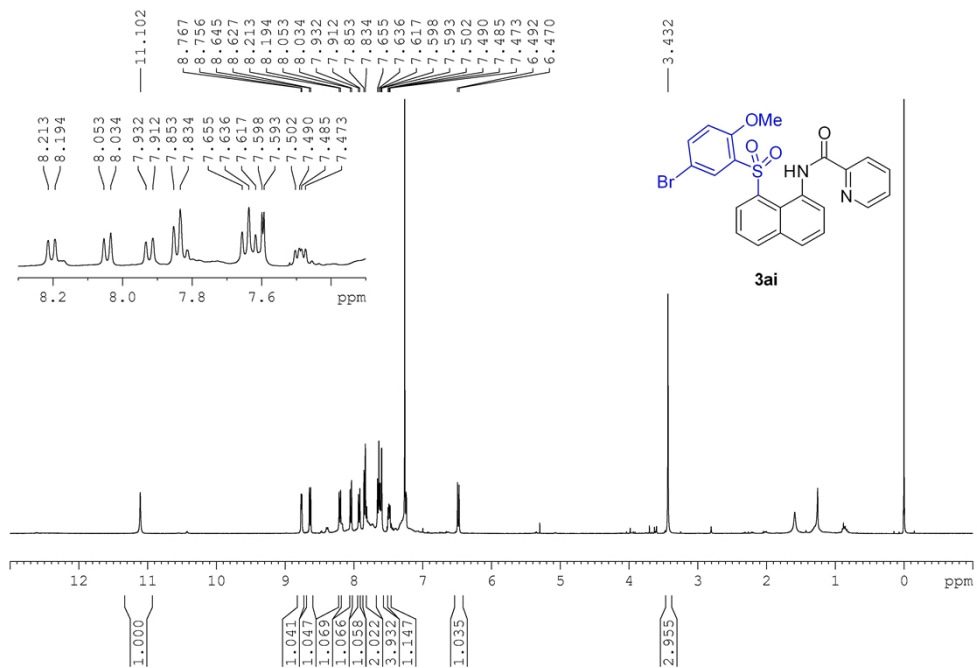



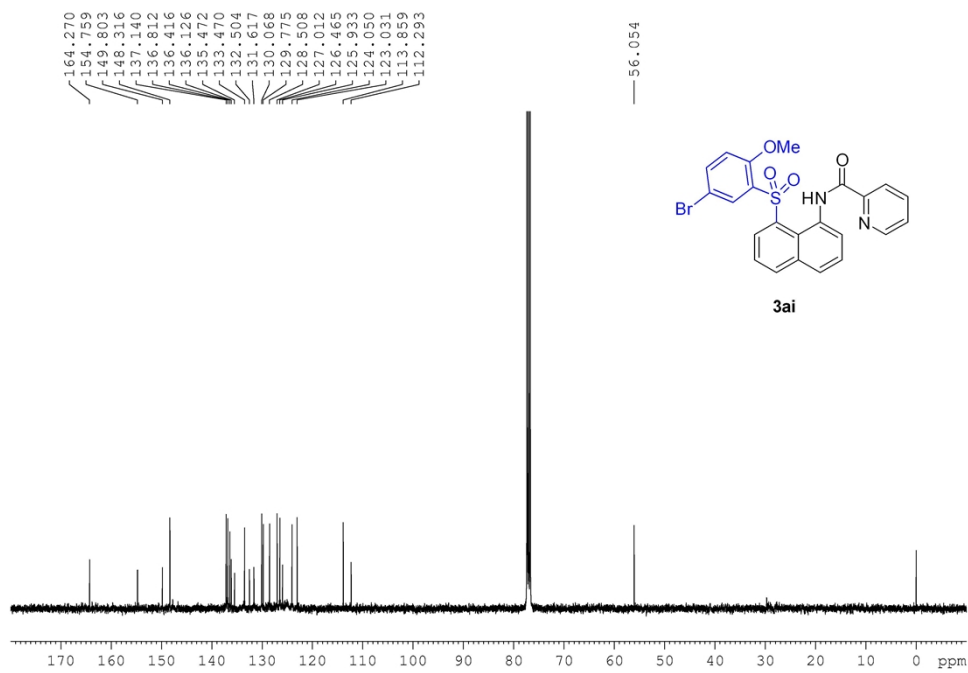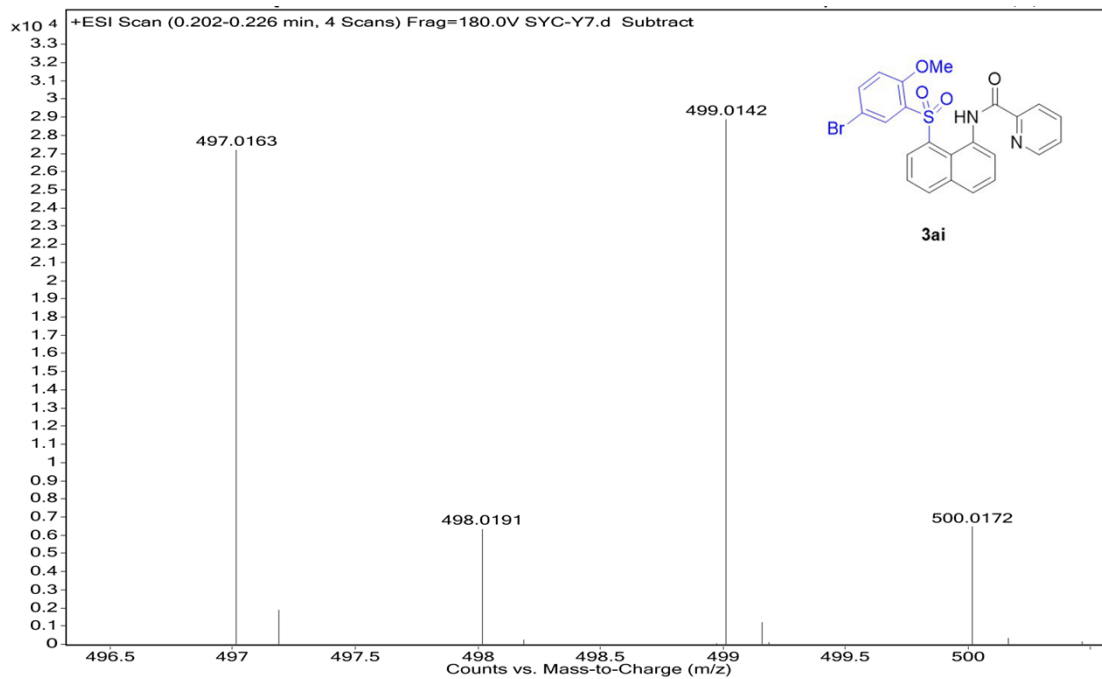

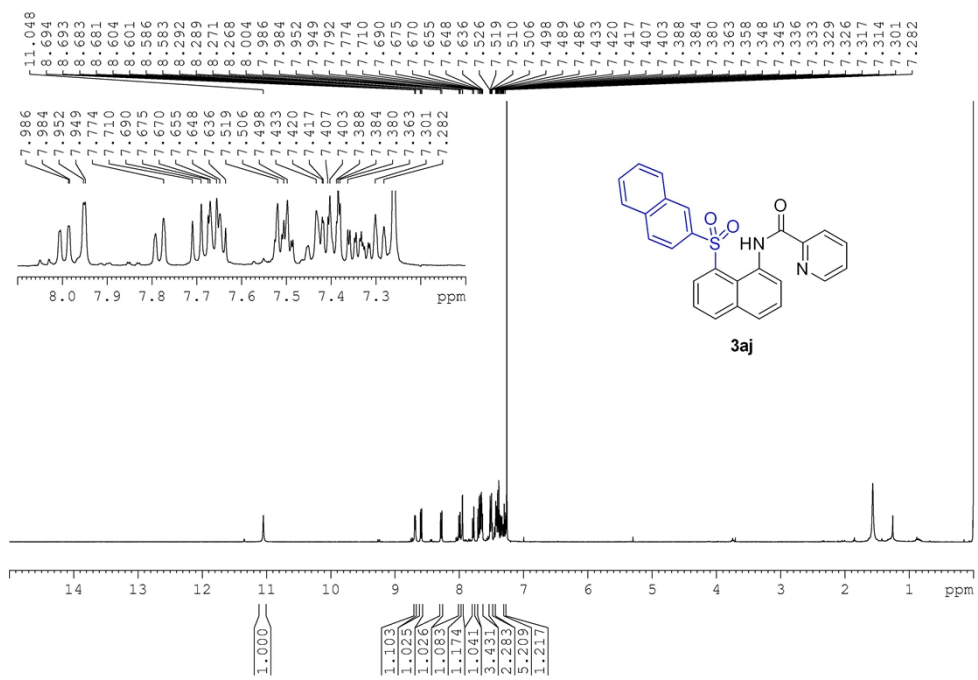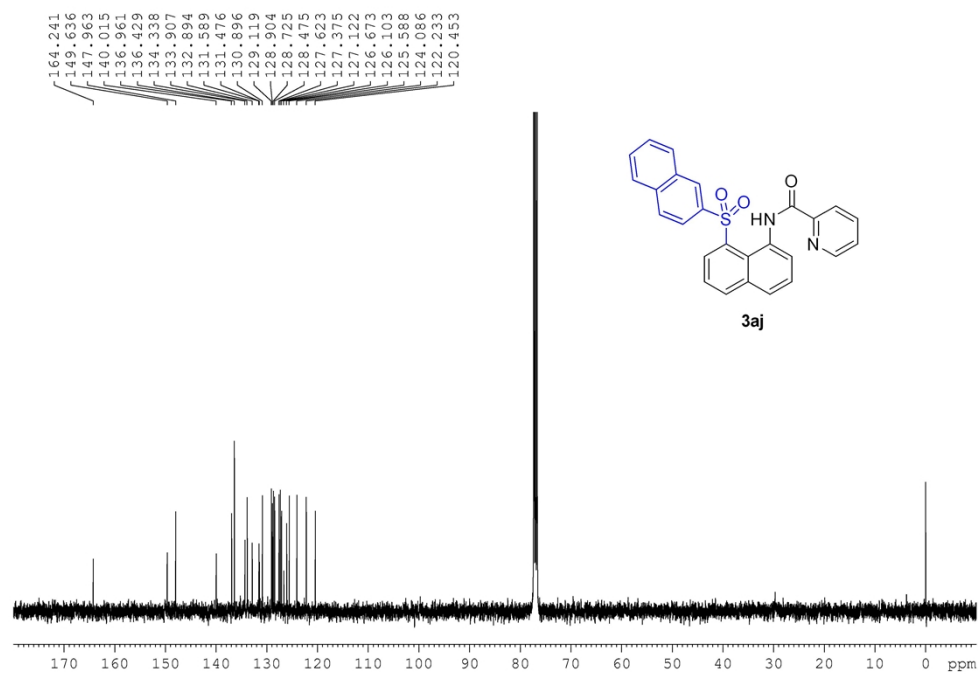

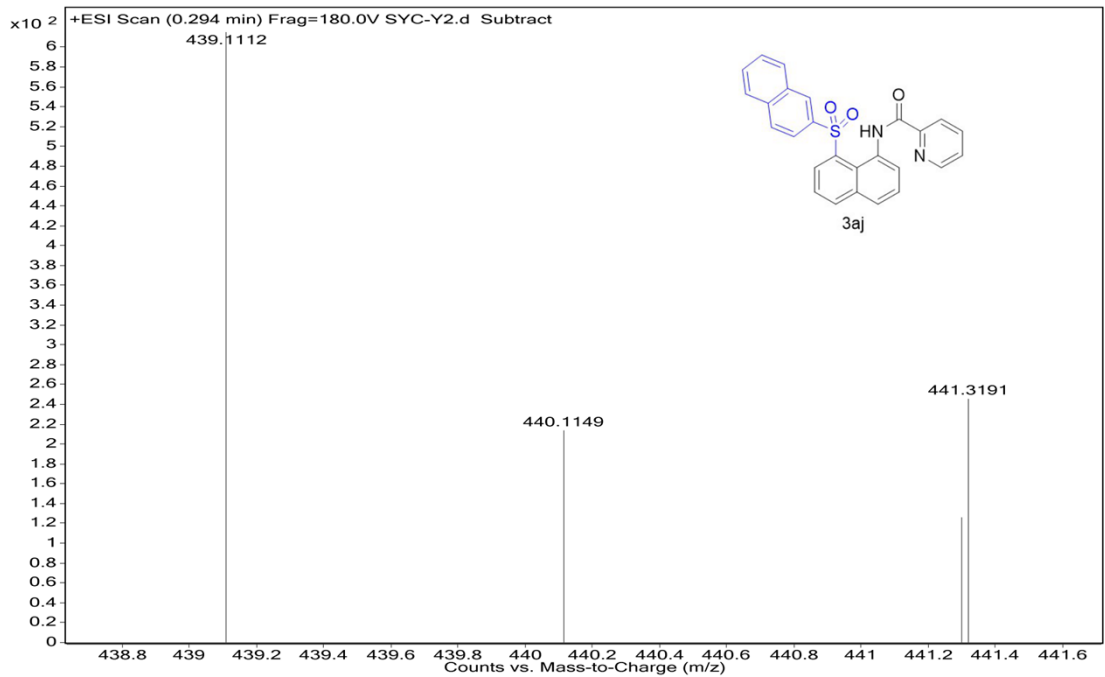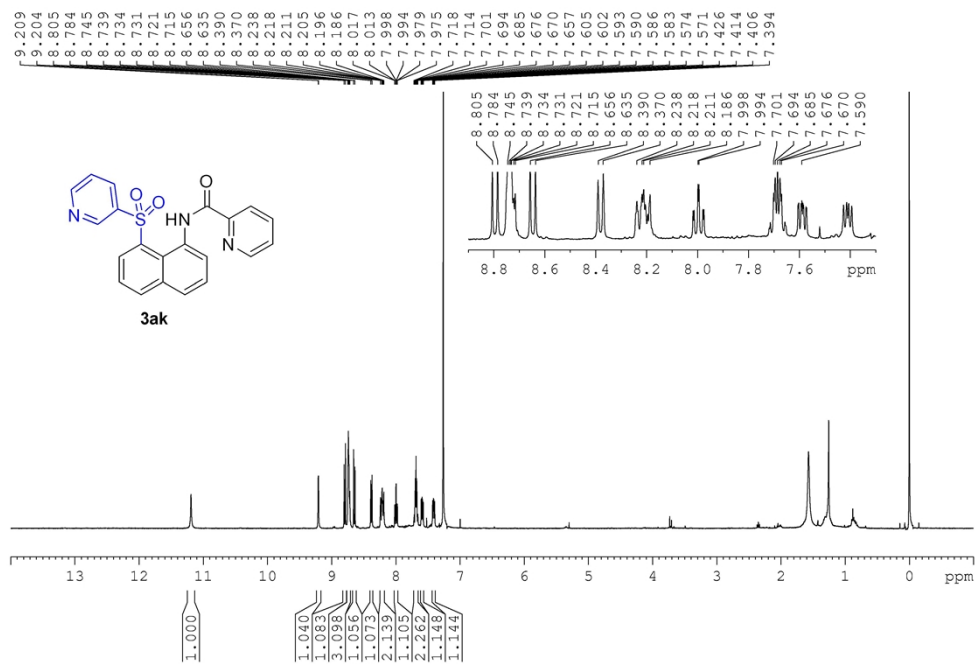

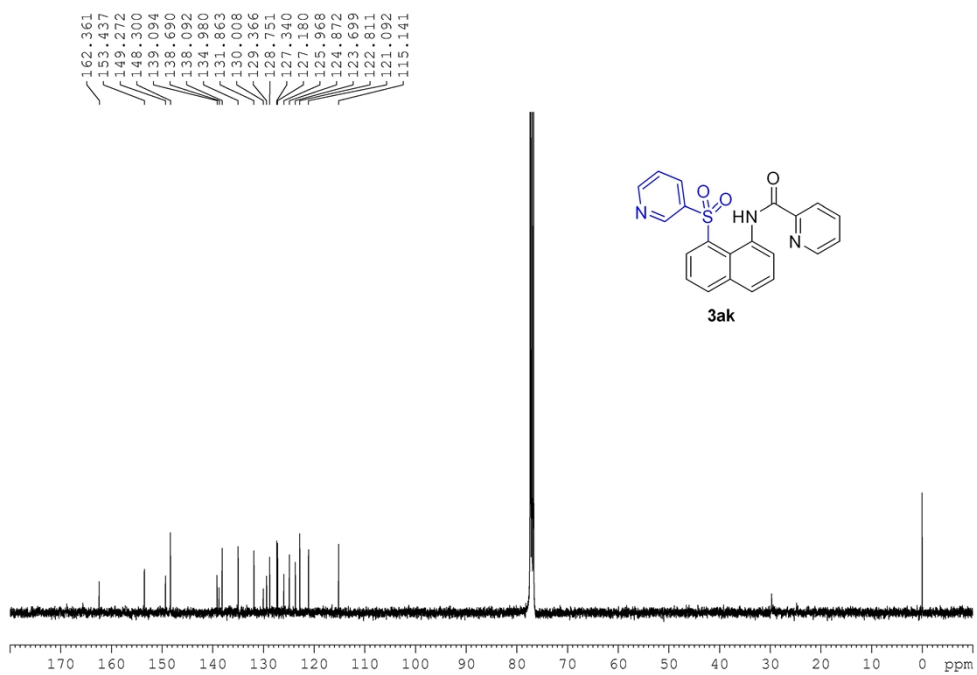

2021-WYJ-2 44 (0.815)AM (Cen,2, 80.00, Ht,5000.0,0.00,1.00); Sm (Mn, 2x3.00); Cm (2:51)

TOF MS ES+  
269

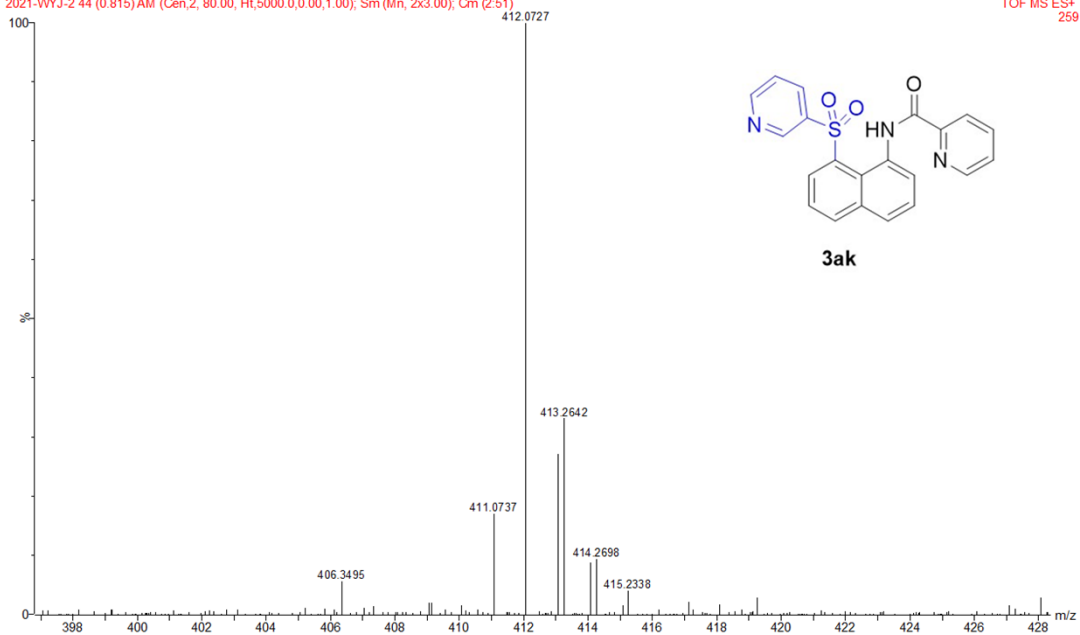



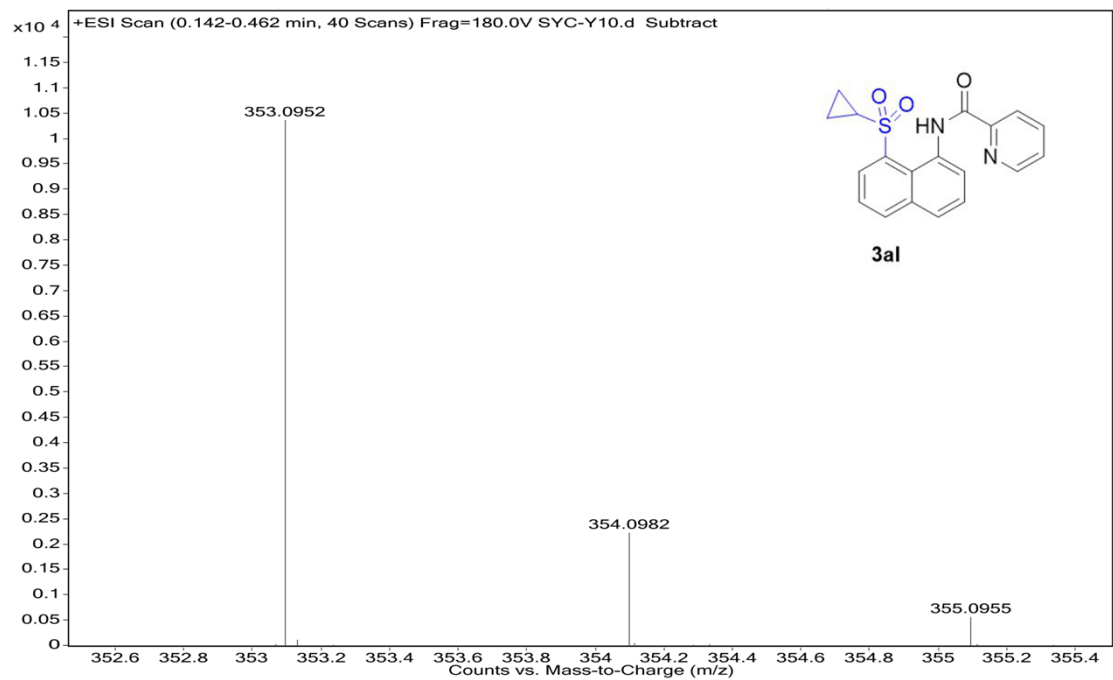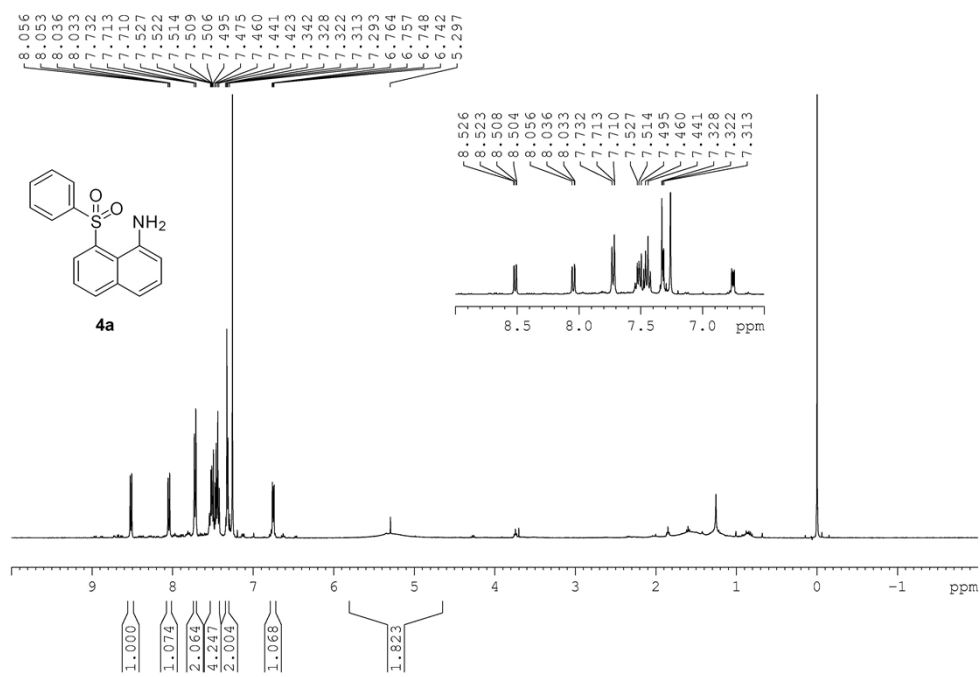

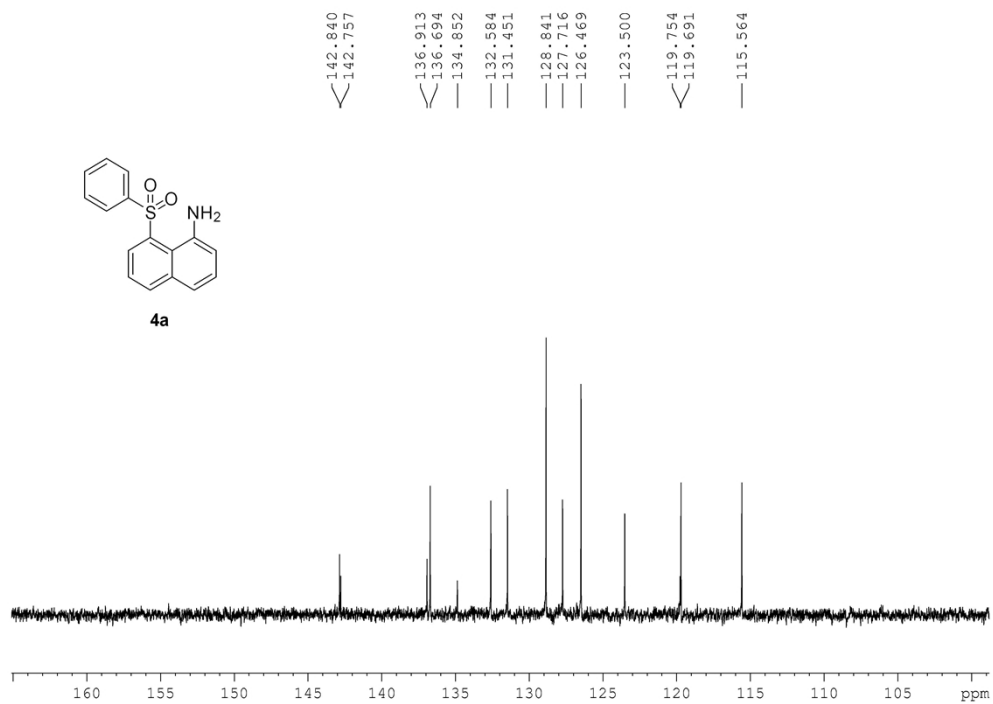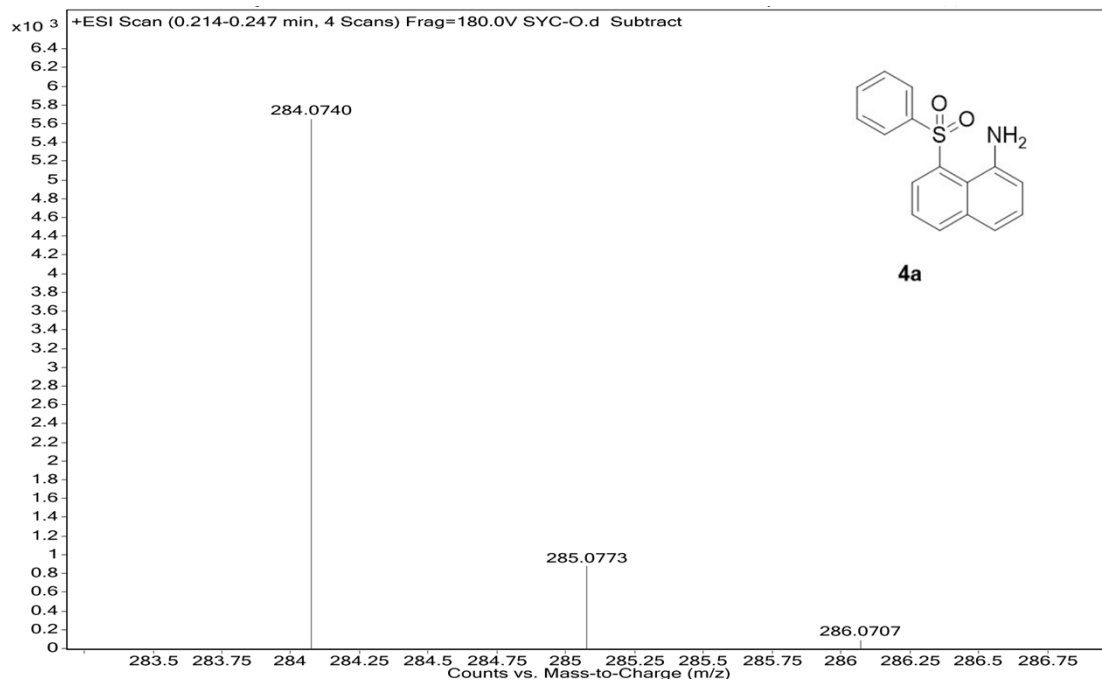

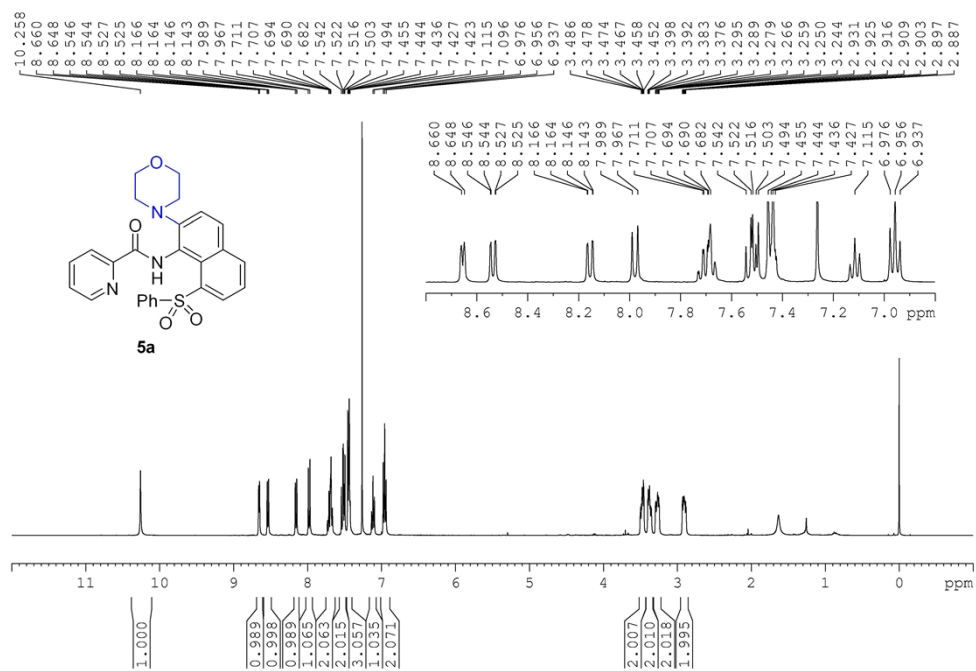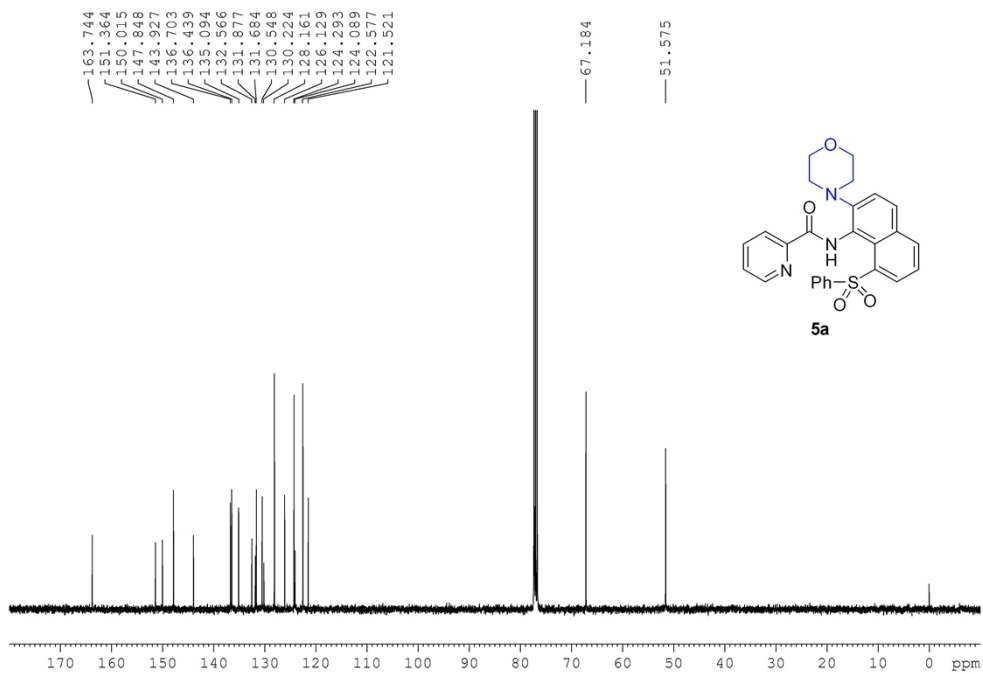



2021-WYJ-4 19 (0.352) AM (Cen,2, 80.00, Ht,5000.0,0.00,1.00); Sm (Mn, 2x3.00); Cm (2:19)

TOF MS ES+  
979

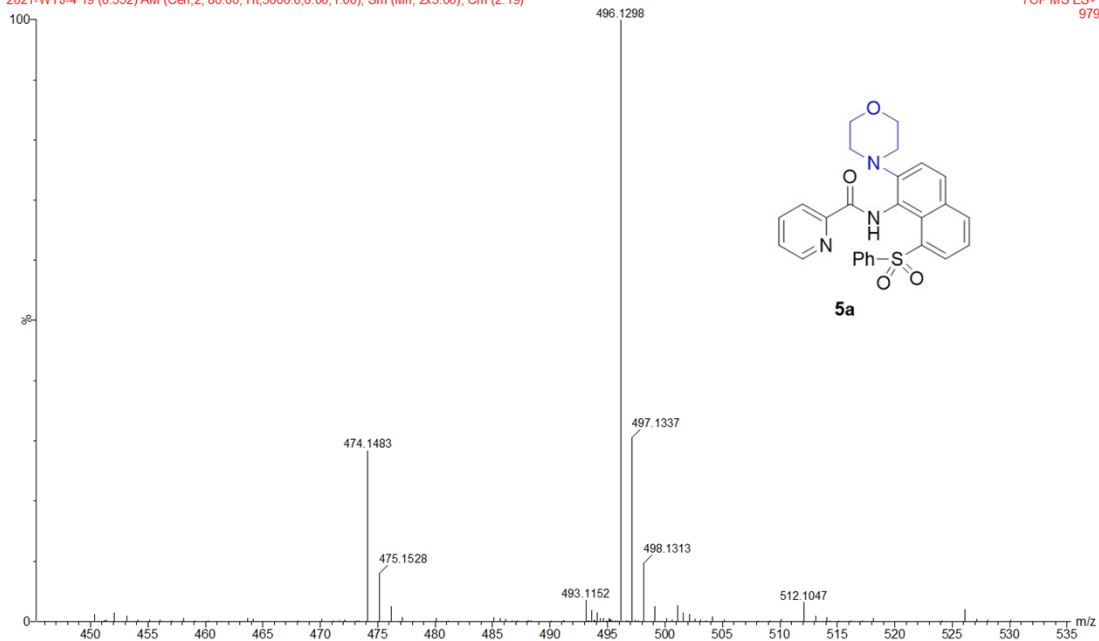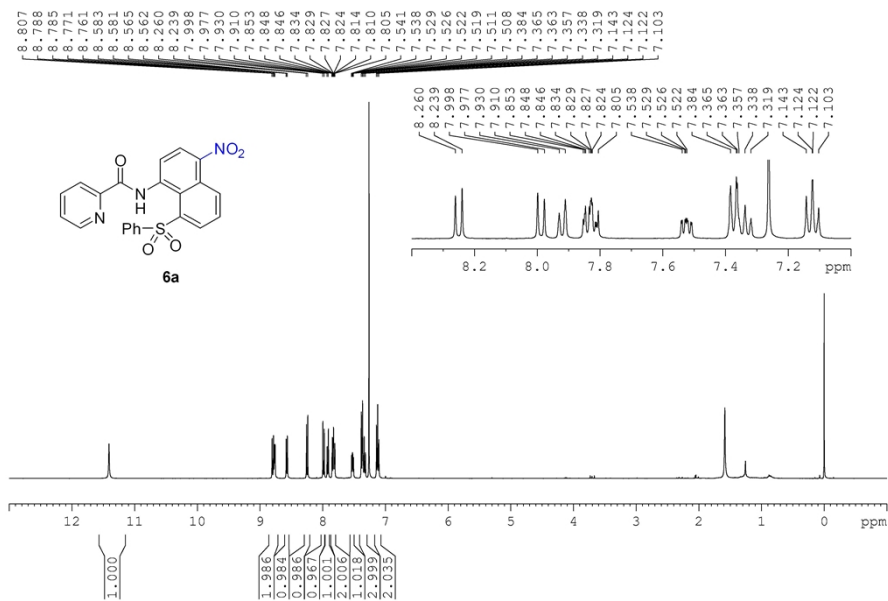

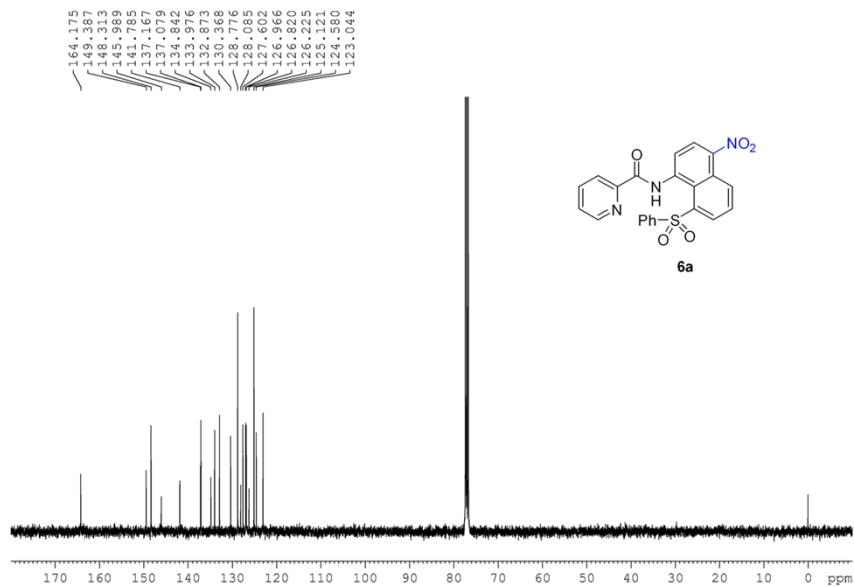

2021-WYJ-3 21 (0.389) AM (Cen,2, 80.00, Ht,5000.0 0.00,1.00); Sm (Mn, 2x3.00); Cm (2.21)

TOF MS ES+  
742

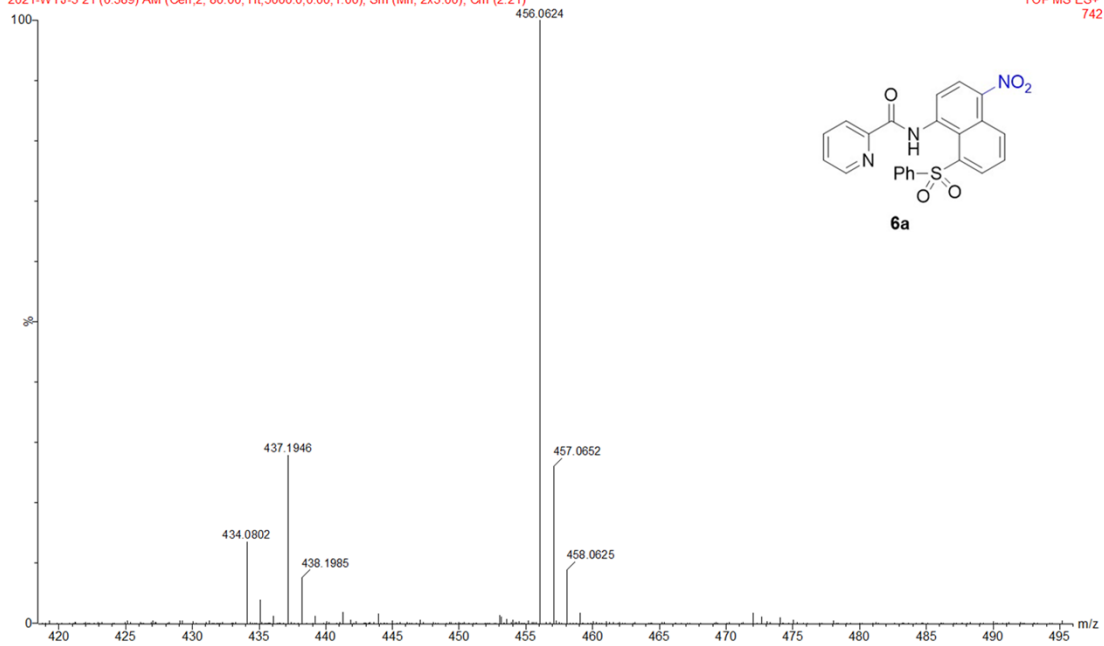

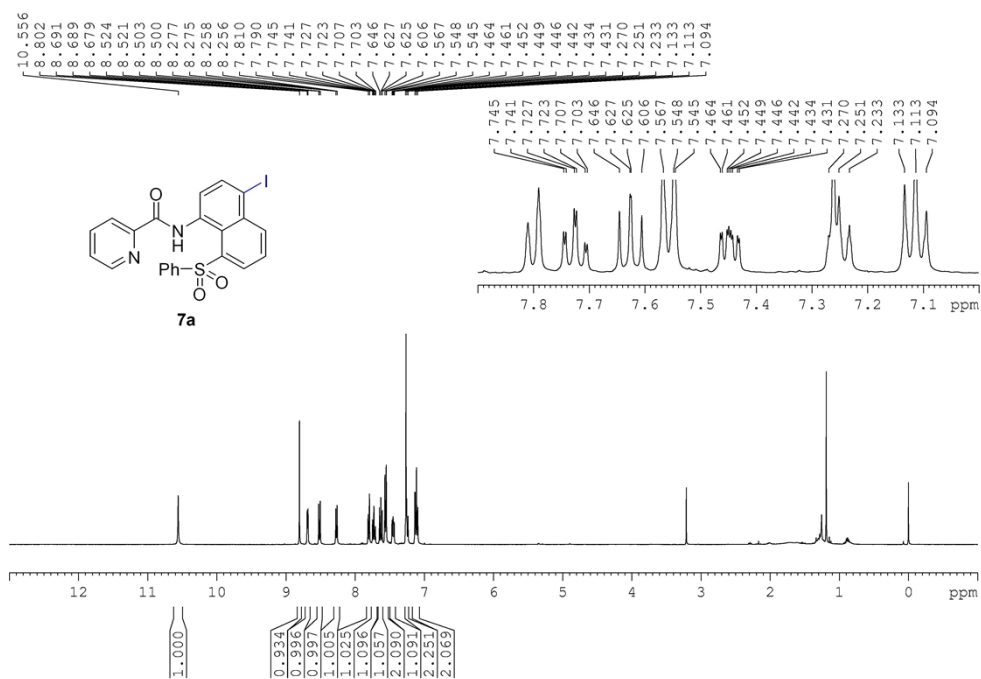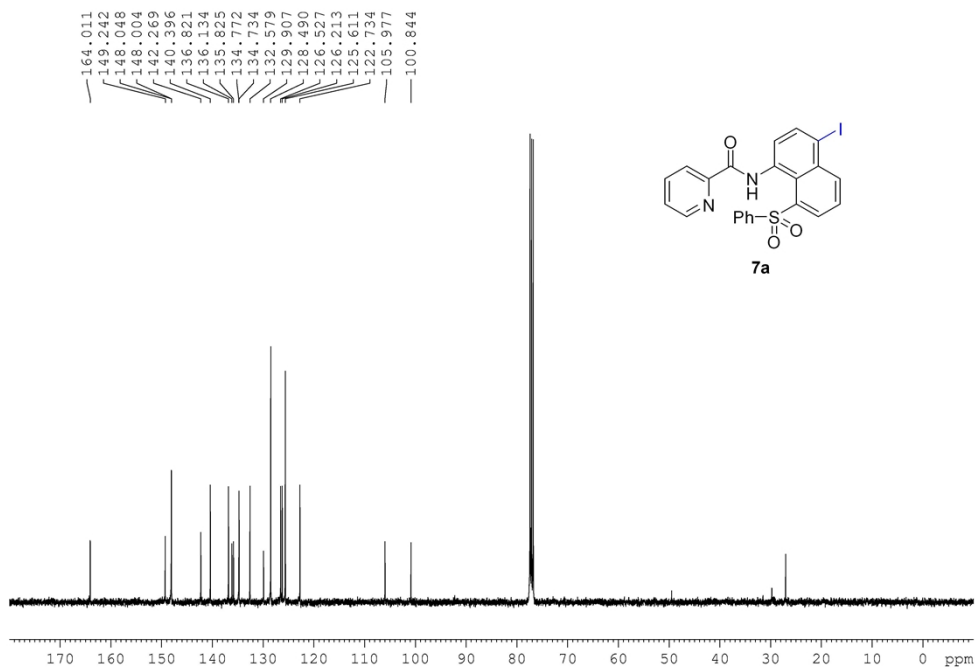

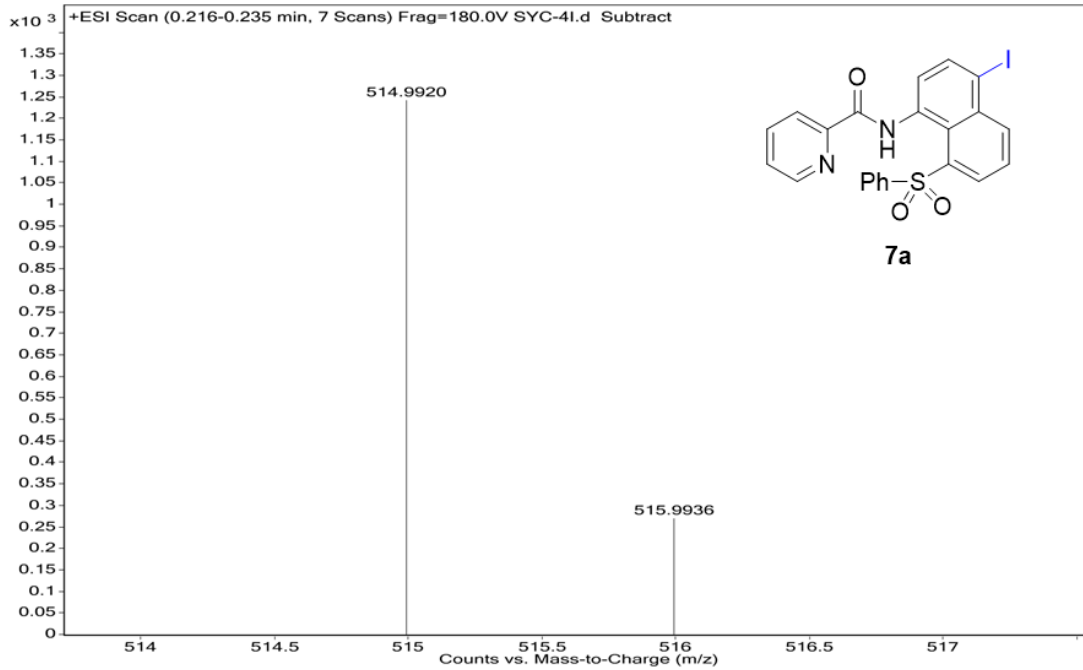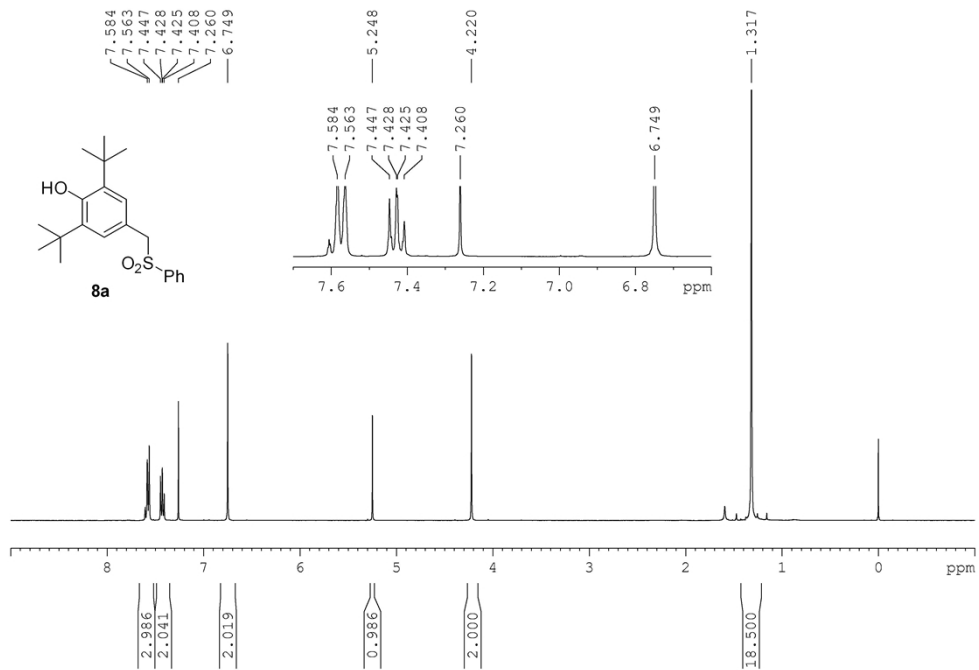

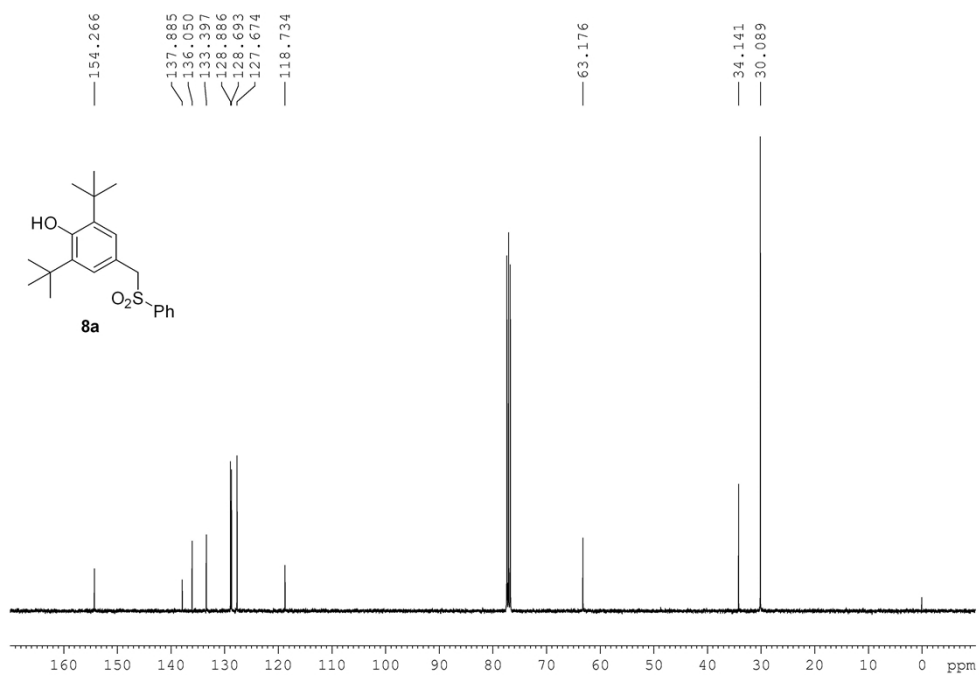

Supplement: d1qo00975c1.pdf [file d1qo00975c1.pdf]
